# Supplementary material for: Accuracy of Physicians Interpreting Photoplethysmography and Electrocardiography Tracings to Detect Atrial Fibrillation: INTERPRET-AF
Source: Frontiers journal article supplement (doi:10.3389/fcvm.2021.734737), 2021-09-20

## INTERPRET-AF\_12-lead\_ECG

\* 2. How would you classify the following measurement?

- ☐ Regular rhythm      ☐ One or more ectopic/missed heartbeats      ☐ Atrial flutter      ☐ Atrial fibrillation      ☐ Unreadable
- ☐ Other (please specify)

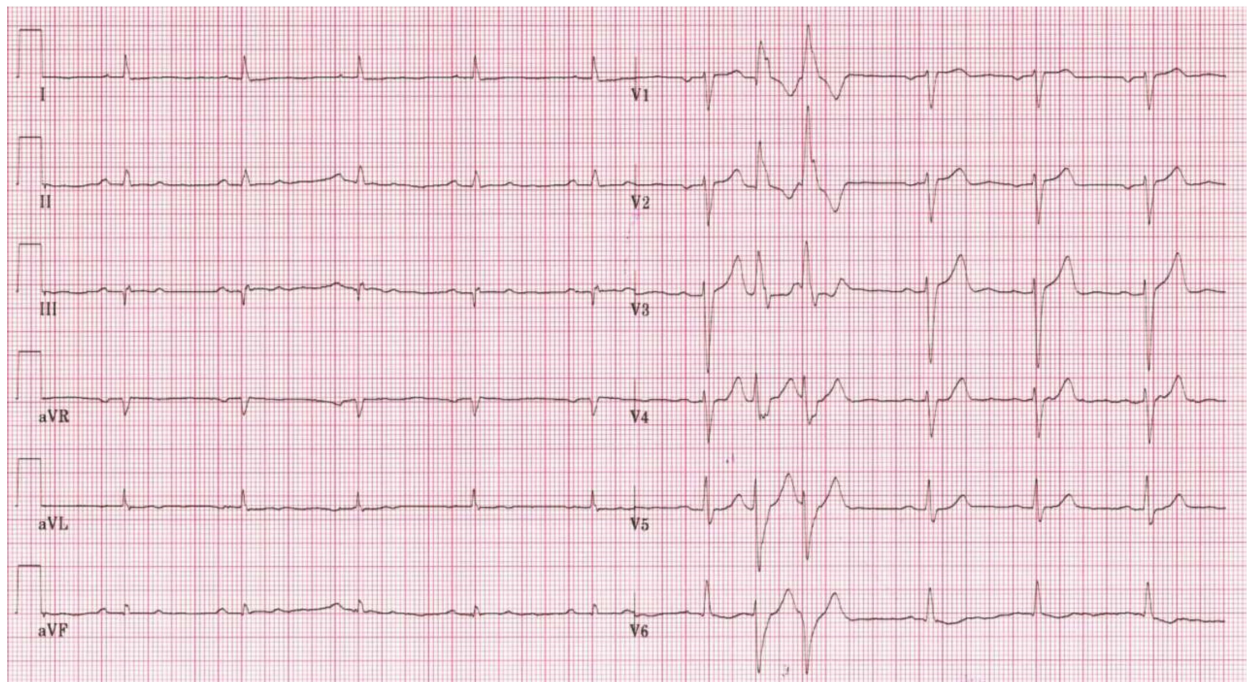

## INTERPRET-AF\_12-lead\_ECG

\* 3. How would you classify this measurement?

- ☐ Regular rhythm      ☐ One or more ectopic/missed heartbeats      ☐ Atrial flutter      ☐ Atrial fibrillation      ☐ Unreadable
- ☐ Other (please specify)

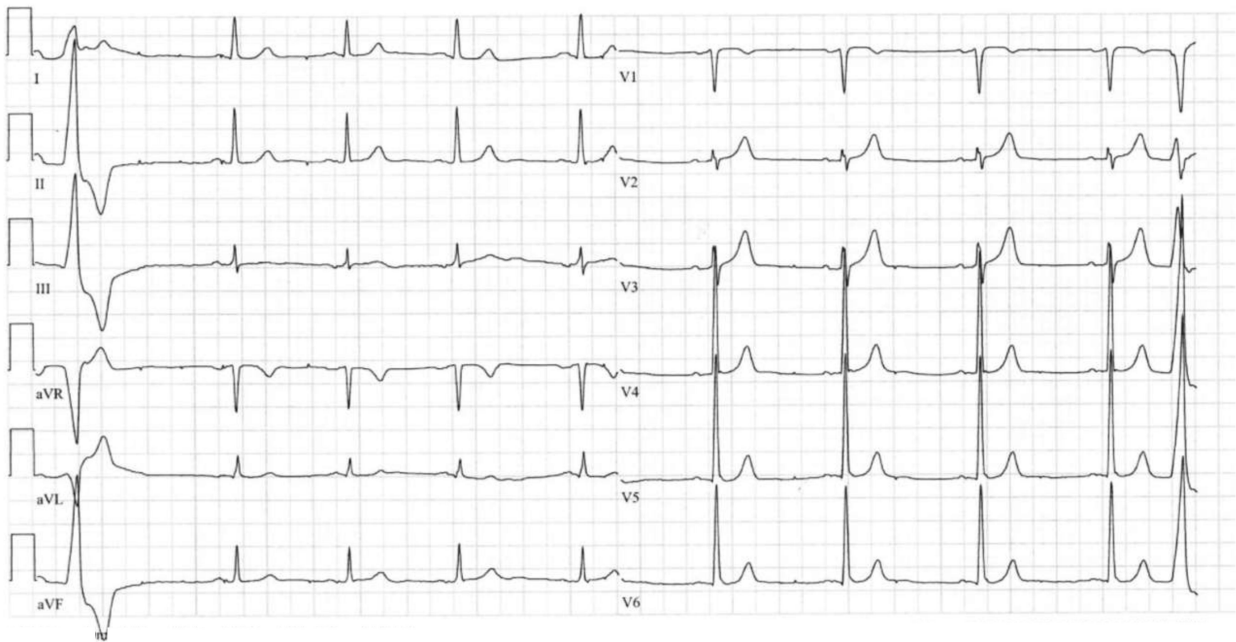

## INTERPRET-AF\_12-lead\_ECG

\* 4. How would you classify the following measurement?

- ☐ Regular rhythm      ☐ One or more ectopic/missed heartbeats      ☐ Atrial flutter      ☐ Atrial fibrillation      ☐ Unreadable
- ☐ Other (please specify)

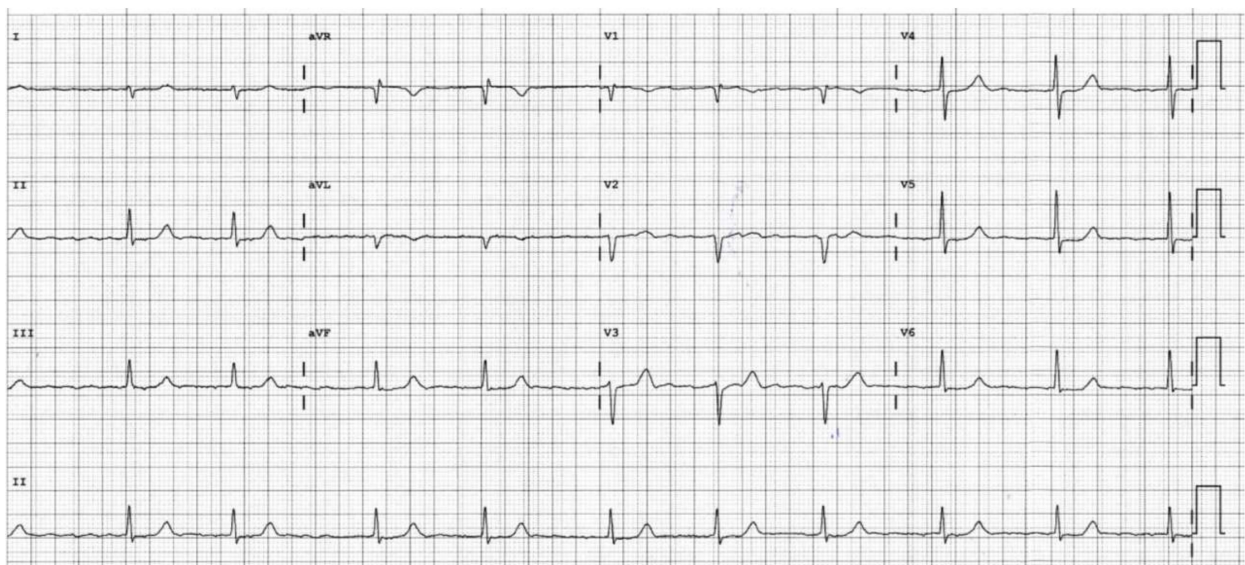

## INTERPRET-AF\_12-lead\_ECG

\* 5. How would you classify the following measurement?

- ☐ Regular rhythm      ☐ One or more ectopic/missed heartbeats      ☐ Atrial flutter      ☐ Atrial fibrillation      ☐ Unreadable
- ☐ Other (please specify)

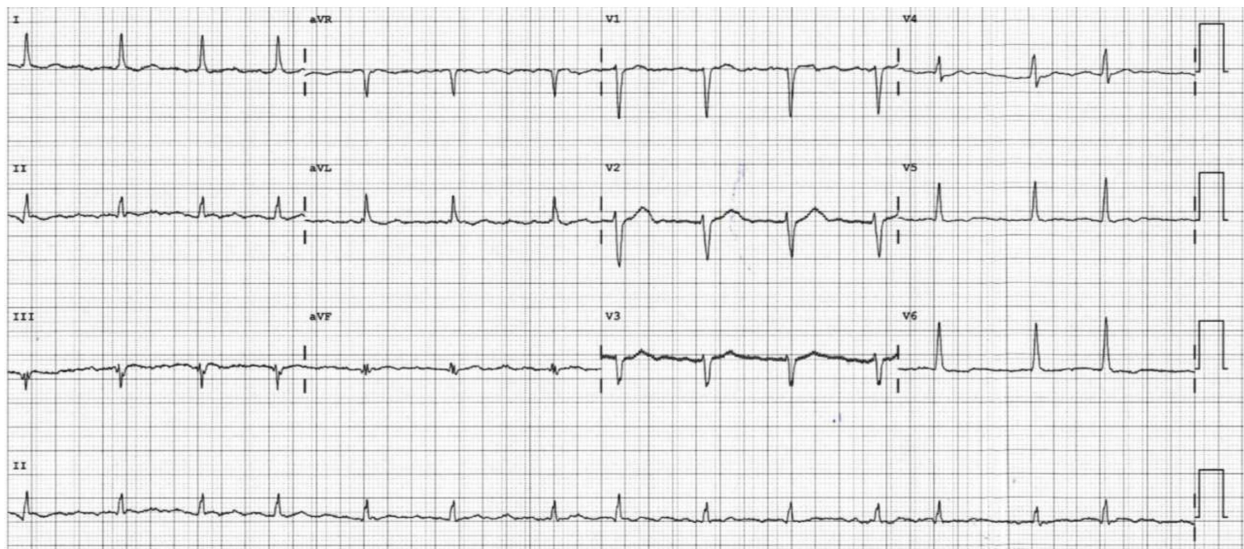



## INTERPRET-AF\_12-lead\_ECG

\* 6. How would you classify the following measurement?

- ☐ Regular rhythm      ☐ One or more ectopic/missed heartbeats      ☐ Atrial flutter      ☐ Atrial fibrillation      ☐ Unreadable
- ☐ Other (please specify)

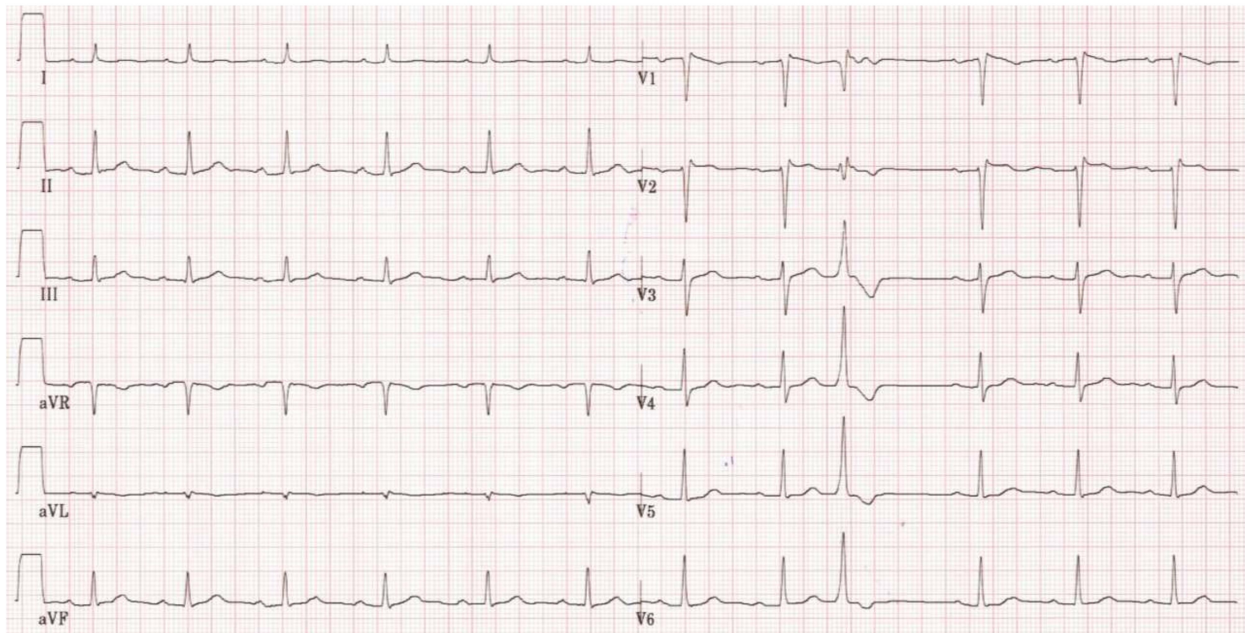

## INTERPRET-AF\_12-lead\_ECG

\* 7. How would you classify the following measurement?

- ☐ Regular rhythm      ☐ One or more ectopic/missed heartbeats      ☐ Atrial flutter      ☐ Atrial fibrillation      ☐ Unreadable
- ☐ Other (please specify)

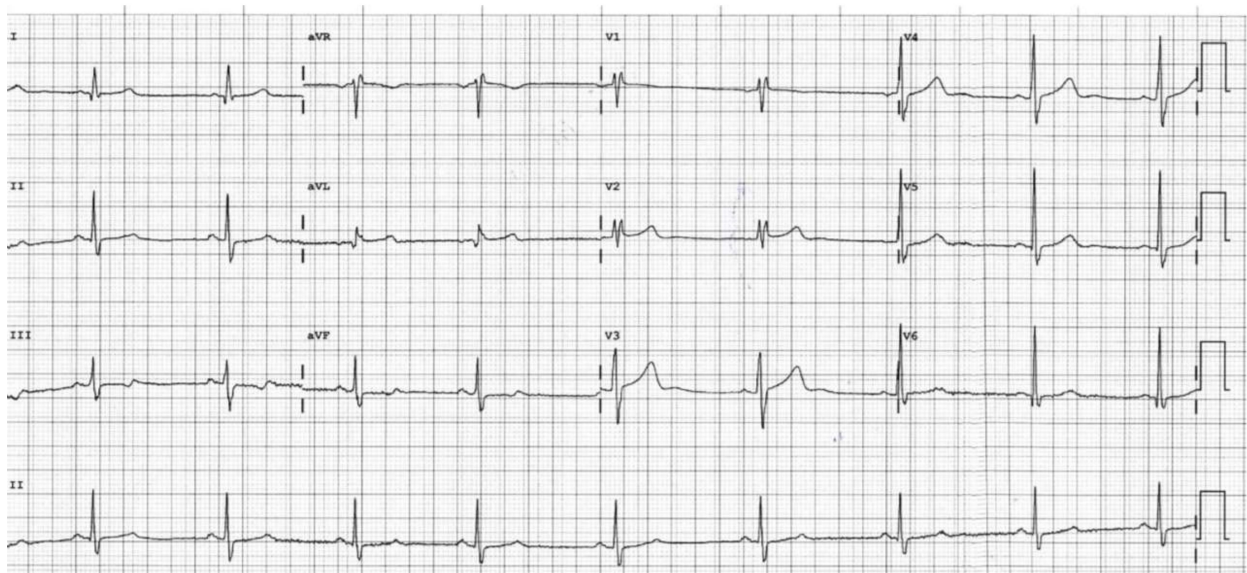

## INTERPRET-AF\_12-lead\_ECG

\* 8. How would you classify the following measurement?

- ☐ Regular rhythm      ☐ One or more ectopic/missed heartbeats      ☐ Atrial flutter      ☐ Atrial fibrillation      ☐ Unreadable
- ☐ Other (please specify)

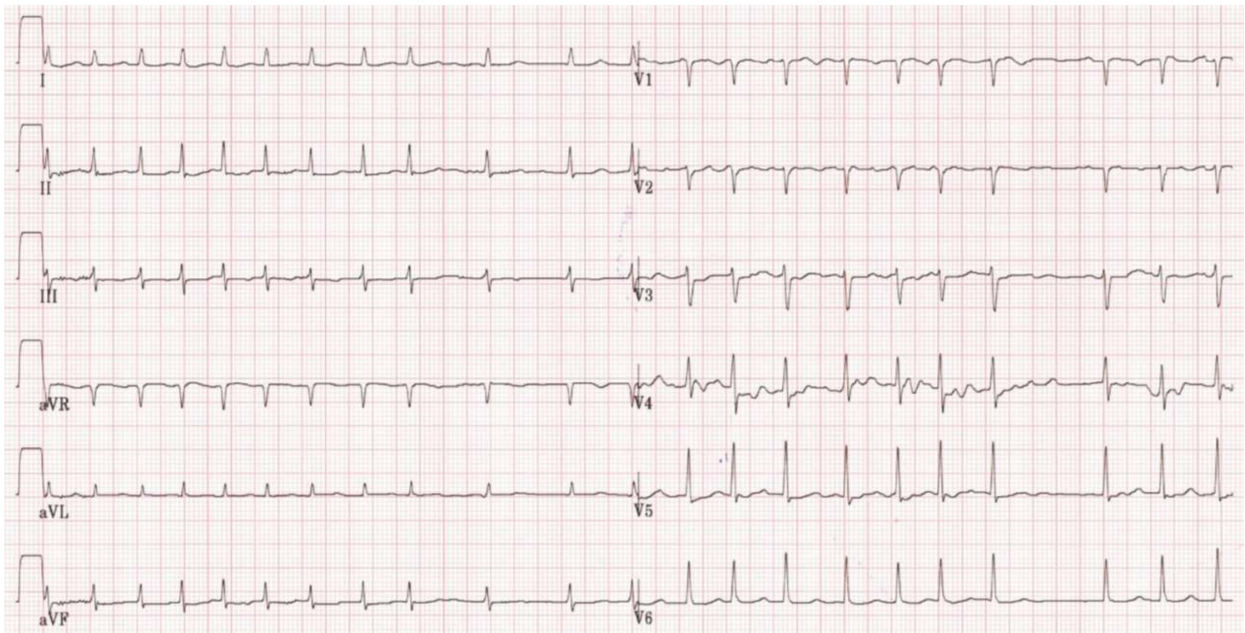

## INTERPRET-AF\_12-lead\_ECG

\* 9. How would you classify the following measurement?

- ☐ Regular rhythm      ☐ One or more ectopic/missed heartbeats      ☐ Atrial flutter      ☐ Atrial fibrillation      ☐ Unreadable
- ☐ Other (please specify)

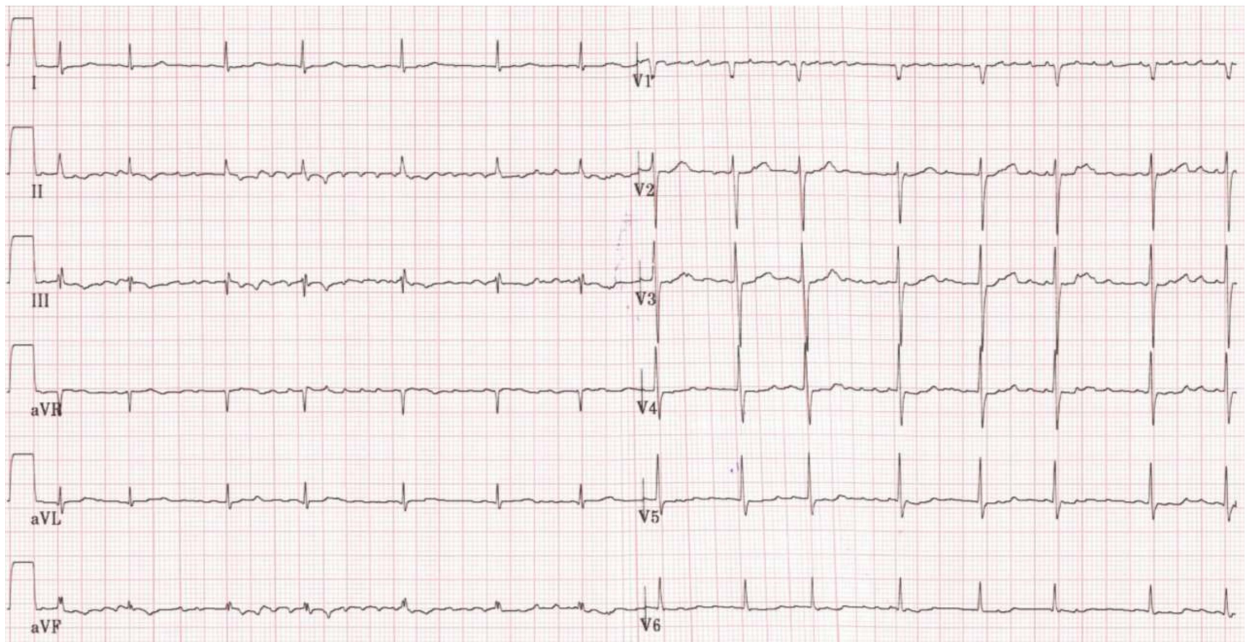



## INTERPRET-AF\_12-lead\_ECG

\* 10. How would you classify the following measurement?

- ☐ Regular rhythm      ☐ One or more ectopic/missed heartbeats      ☐ Atrial flutter      ☐ Atrial fibrillation      ☐ Unreadable
- ☐ Other (please specify)

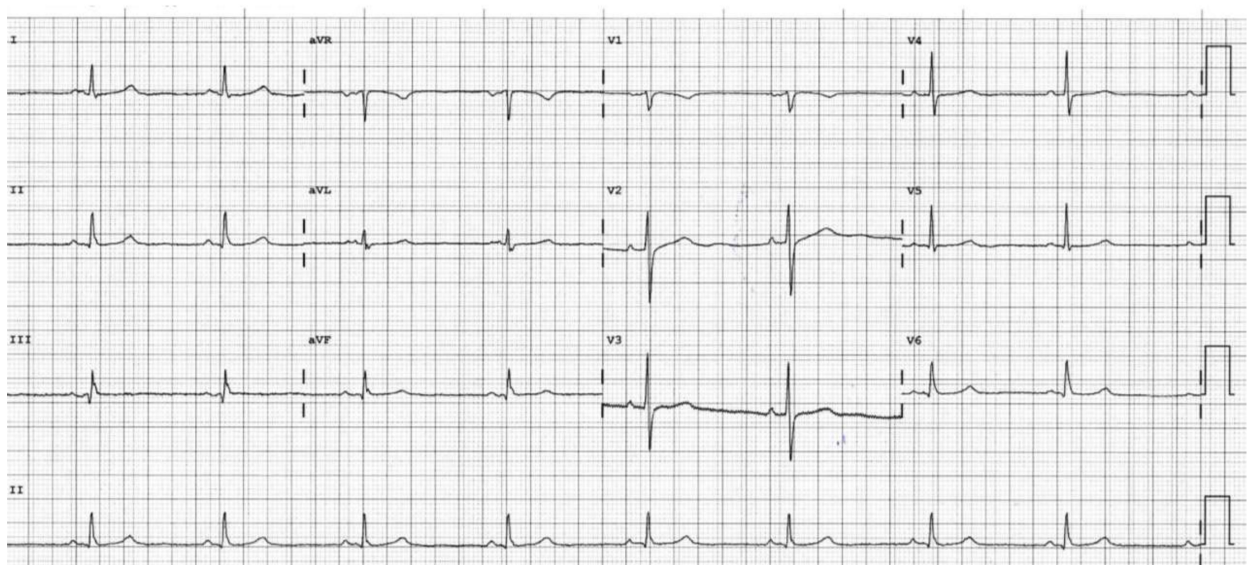

## INTERPRET-AF\_12-lead\_ECG

\* 11. How would you classify the following measurement?

- ☐ Regular rhythm      ☐ One or more ectopic/missed heartbeats      ☐ Atrial flutter      ☐ Atrial fibrillation      ☐ Unreadable
- ☐ Other (please specify)

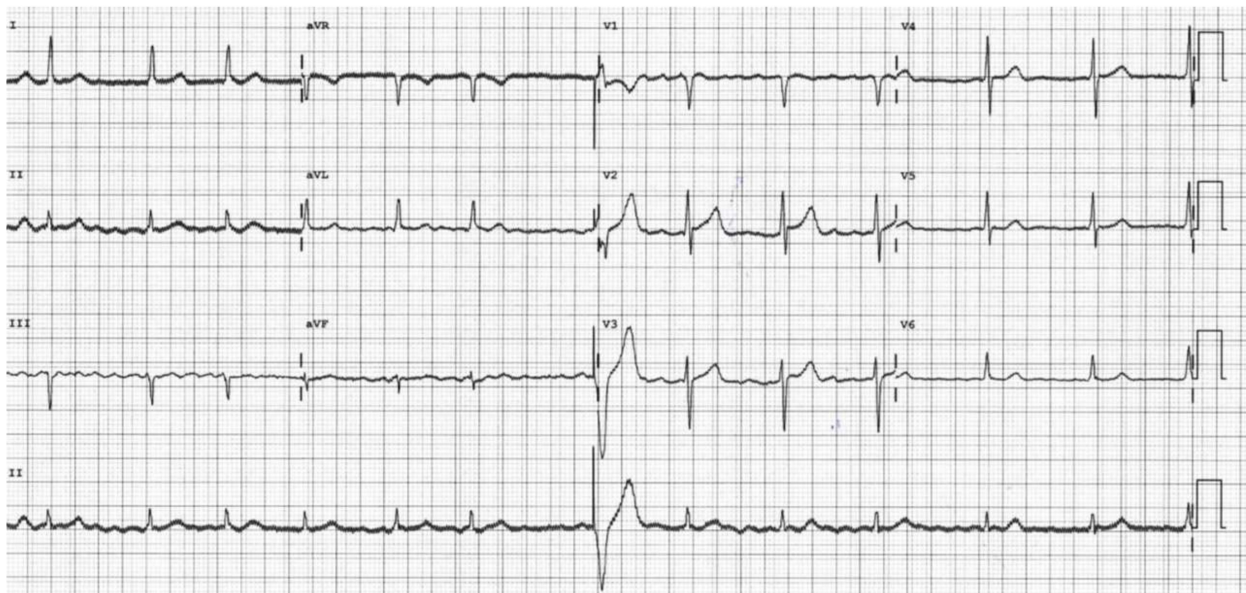

## INTERPRET-AF\_12-lead\_ECG

\* 12. How would you classify the following measurement?

- ☐ Regular rhythm      ☐ One or more ectopic/missed heartbeats      ☐ Atrial flutter      ☐ Atrial fibrillation      ☐ Unreadable
- ☐ Other (please specify)

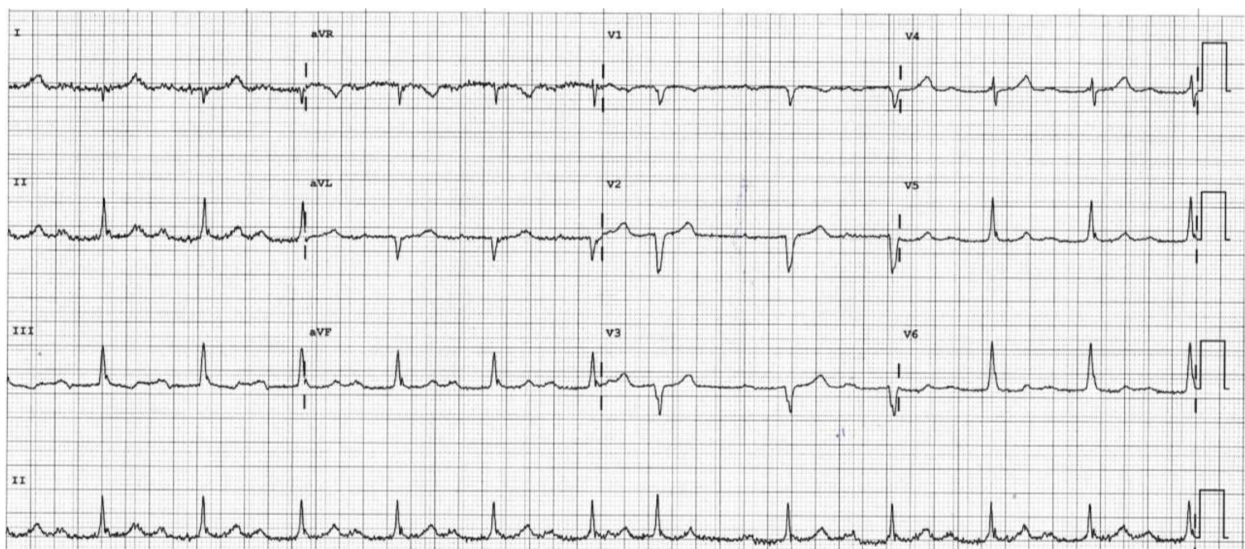

## INTERPRET-AF\_12-lead\_ECG

\* 13. How would you classify the following measurement?

- ☐ Regular rhythm      ☐ One or more ectopic/missed heartbeats      ☐ Atrial flutter      ☐ Atrial fibrillation      ☐ Unreadable
- ☐ Other (please specify)

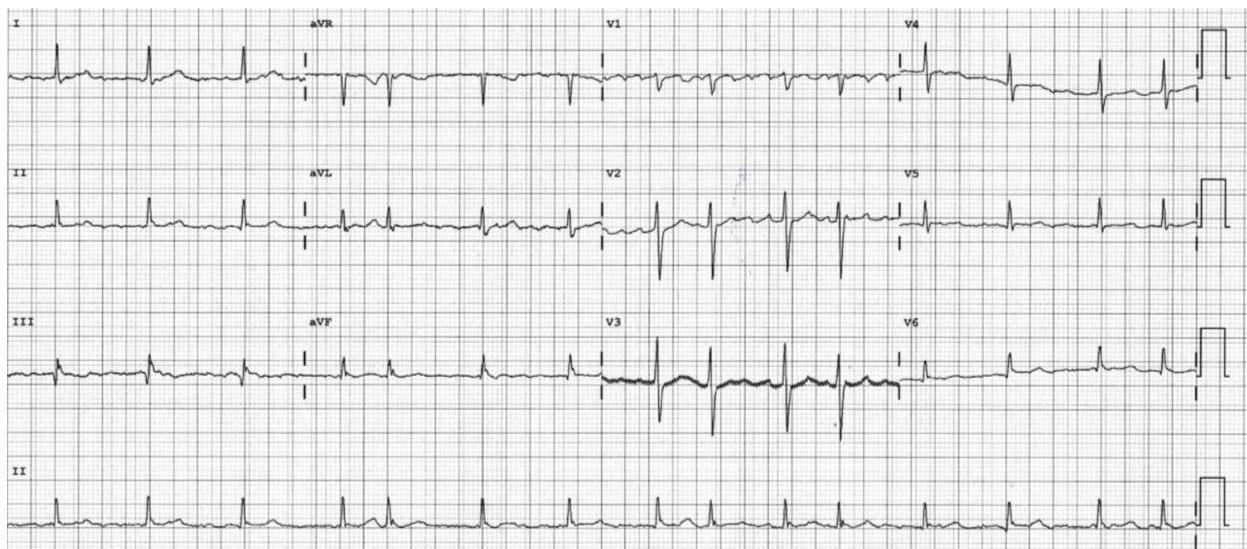



## INTERPRET-AF\_12-lead\_ECG

\* 14. How would you classify the following measurement?

- ☐ Regular rhythm      ☐ One or more ectopic/missed heartbeats      ☐ Atrial flutter      ☐ Atrial fibrillation      ☐ Unreadable
- ☐ Other (please specify)

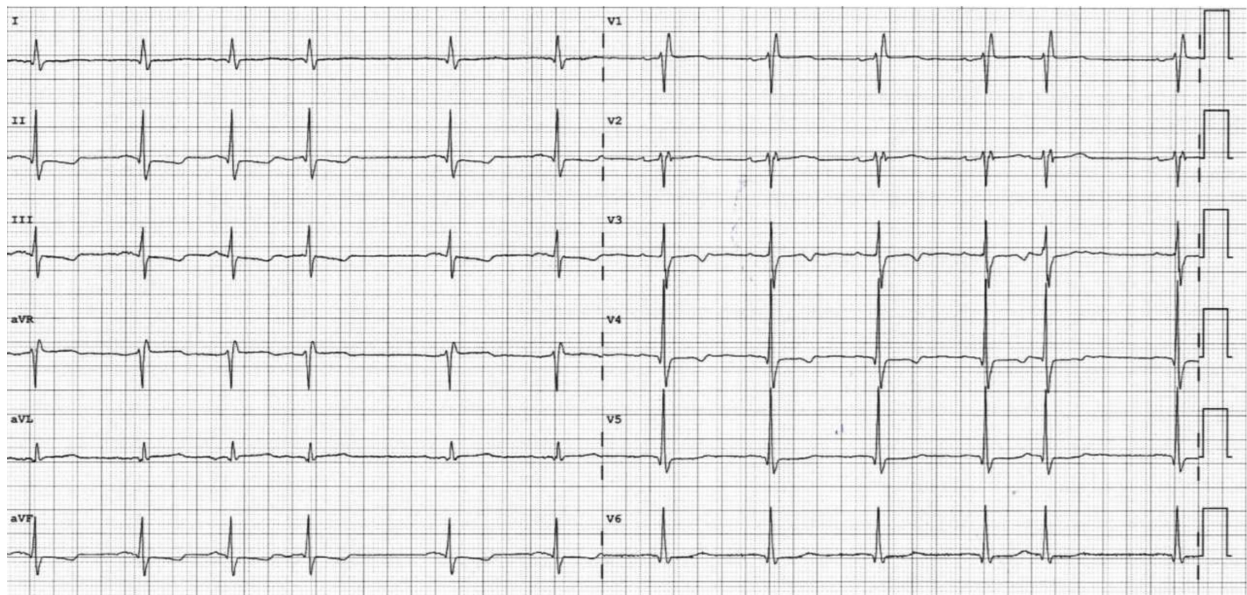

## INTERPRET-AF\_12-lead\_ECG

\* 15. How would you classify the following measurement?

- ☐ Regular rhythm      ☐ One or more ectopic/missed heartbeats      ☐ Atrial flutter      ☐ Atrial fibrillation      ☐ Unreadable
- ☐ Other (please specify)

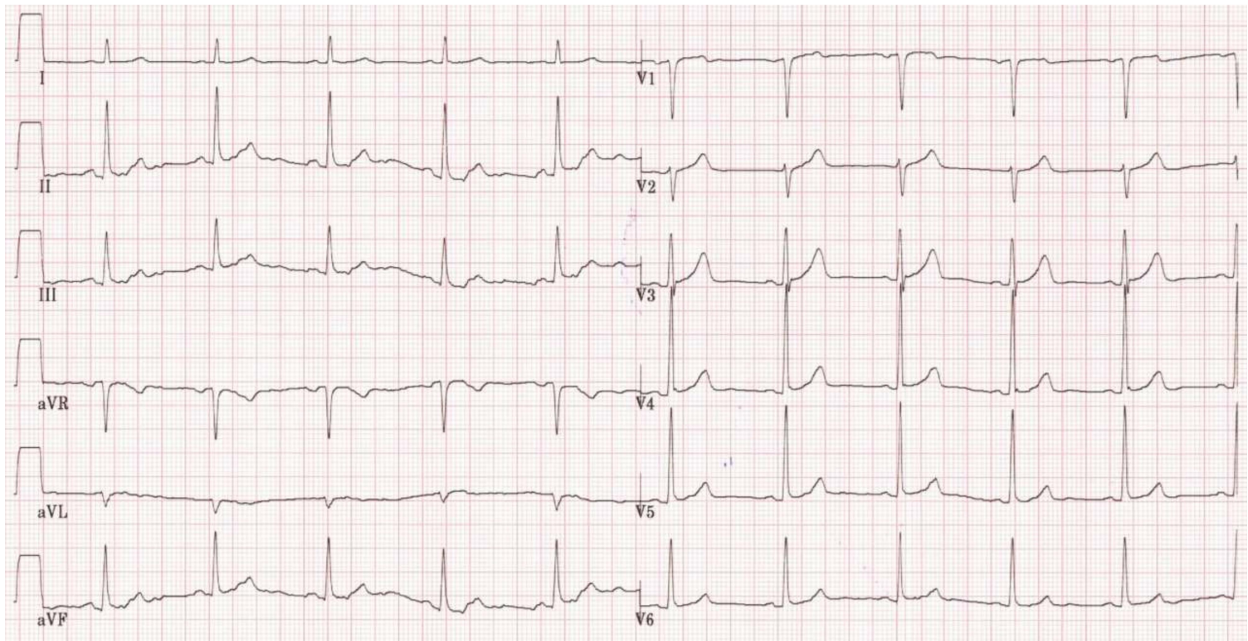

## INTERPRET-AF\_12-lead\_ECG

\* 16. How would you classify the following measurement?

- ☐ Regular rhythm      ☐ One or more ectopic/missed heartbeats      ☐ Atrial flutter      ☐ Atrial fibrillation      ☐ Unreadable
- ☐ Other (please specify)

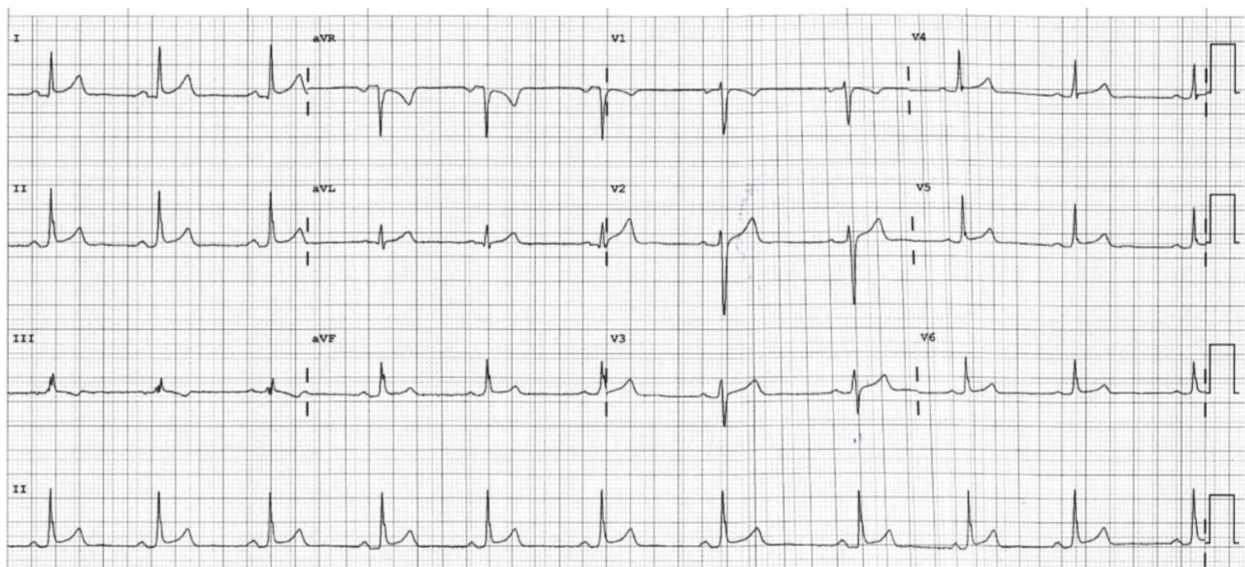

## INTERPRET-AF\_12-lead\_ECG

\* 17. How would you classify the following measurement?

- ☐ Regular rhythm      ☐ One or more ectopic/missed heartbeats      ☐ Atrial flutter      ☐ Atrial fibrillation      ☐ Unreadable
- ☐ Other (please specify)

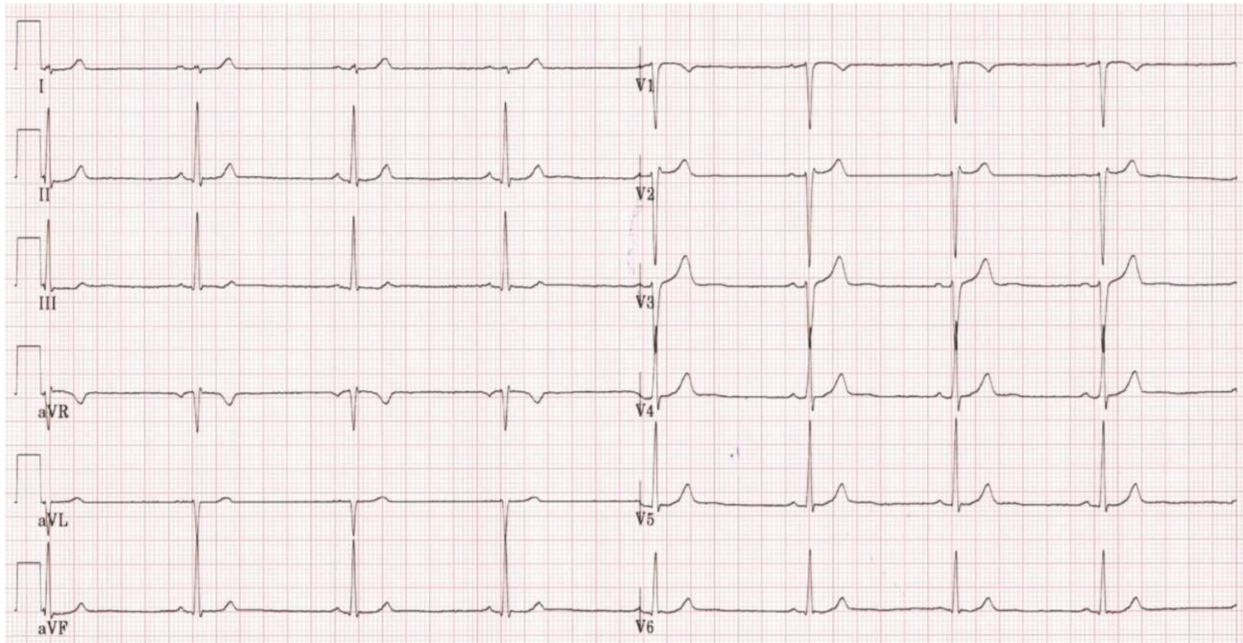



## INTERPRET-AF\_12-lead\_ECG

\* 18. How would you classify the following measurement?

- ☐ Regular rhythm      ☐ One or more ectopic/missed heartbeats      ☐ Atrial flutter      ☐ Atrial fibrillation      ☐ Unreadable
- ☐ Other (please specify)

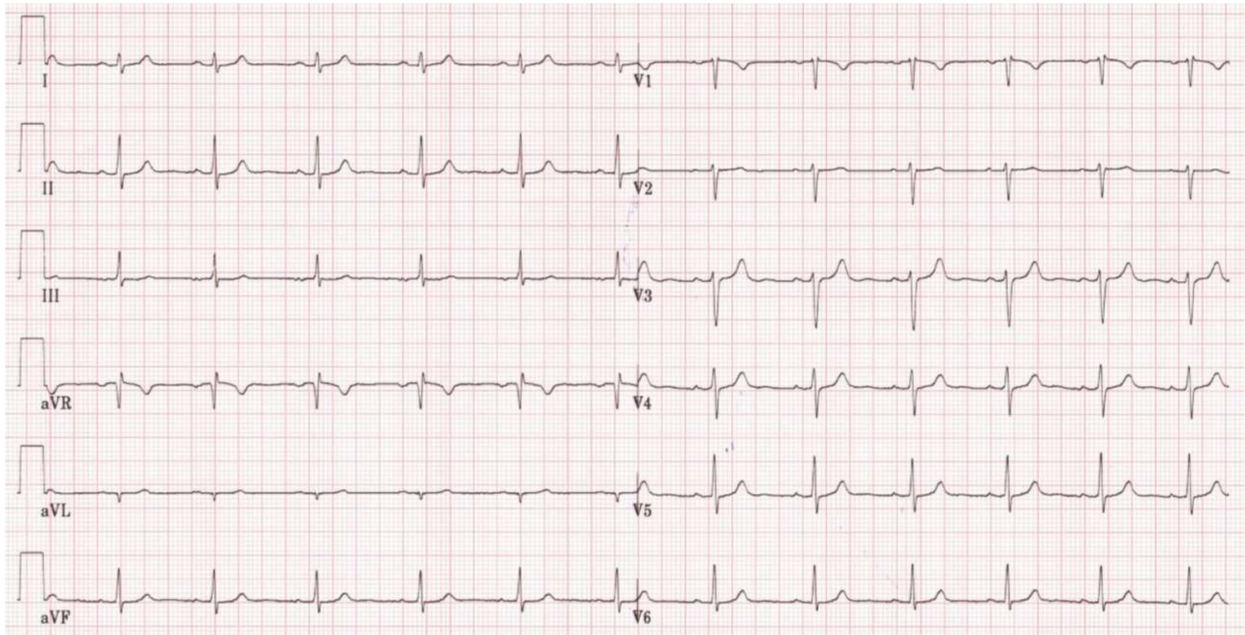

## INTERPRET-AF\_12-lead\_ECG

\* 19. How would you classify the following measurement?

- ☐ Regular rhythm      ☐ One or more ectopic/missed heartbeats      ☐ Atrial flutter      ☐ Atrial fibrillation      ☐ Unreadable
- ☐ Other (please specify)

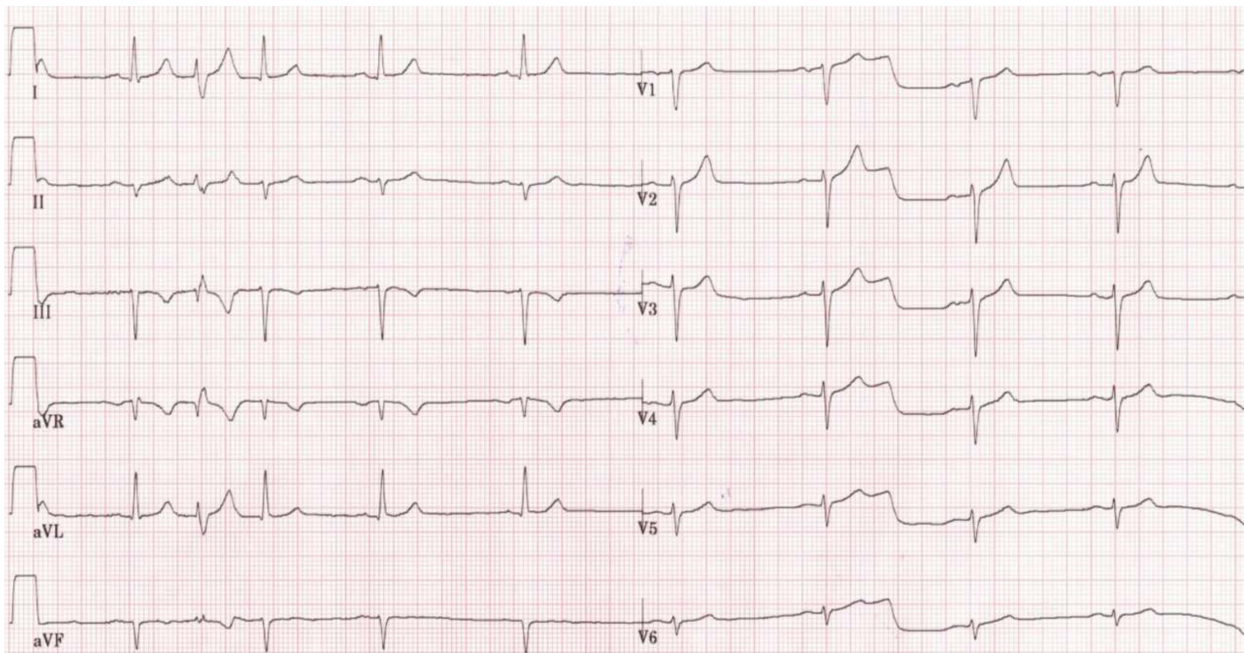

## INTERPRET-AF\_12-lead\_ECG

\* 20. How would you classify the following measurement?

- ☐ Regular rhythm      ☐ One or more ectopic/missed heartbeats      ☐ Atrial flutter      ☐ Atrial fibrillation      ☐ Unreadable
- ☐ Other (please specify)

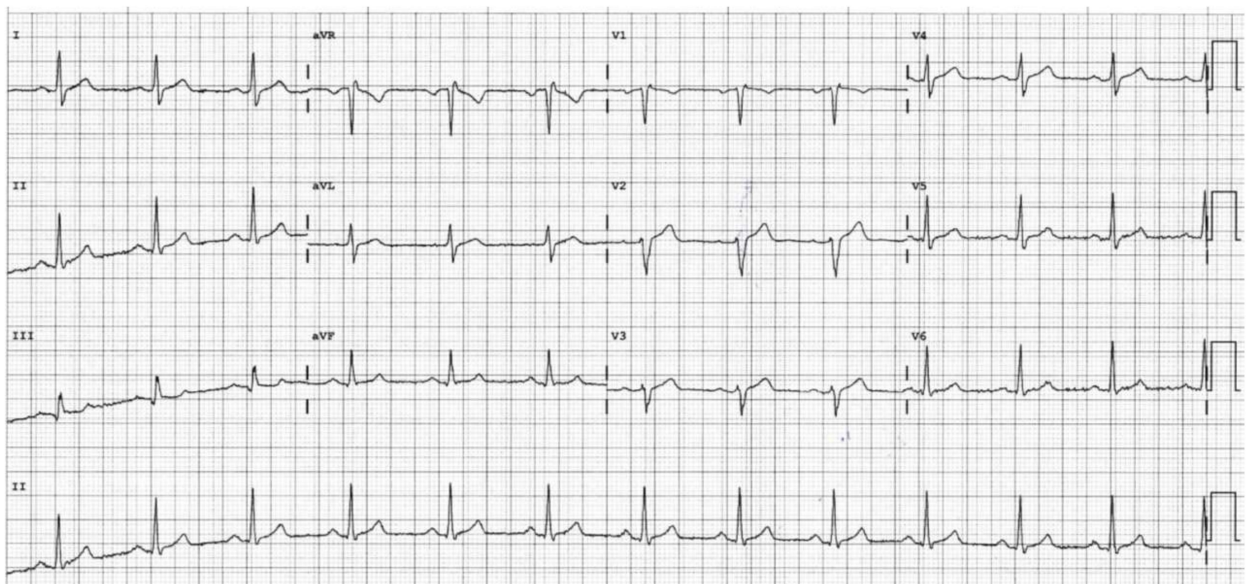

## INTERPRET-AF\_12-lead\_ECG

\* 21. How would you classify the following measurement?

- ☐ Regular rhythm      ☐ One or more ectopic/missed heartbeats      ☐ Atrial flutter      ☐ Atrial fibrillation      ☐ Unreadable
- ☐ Other (please specify)

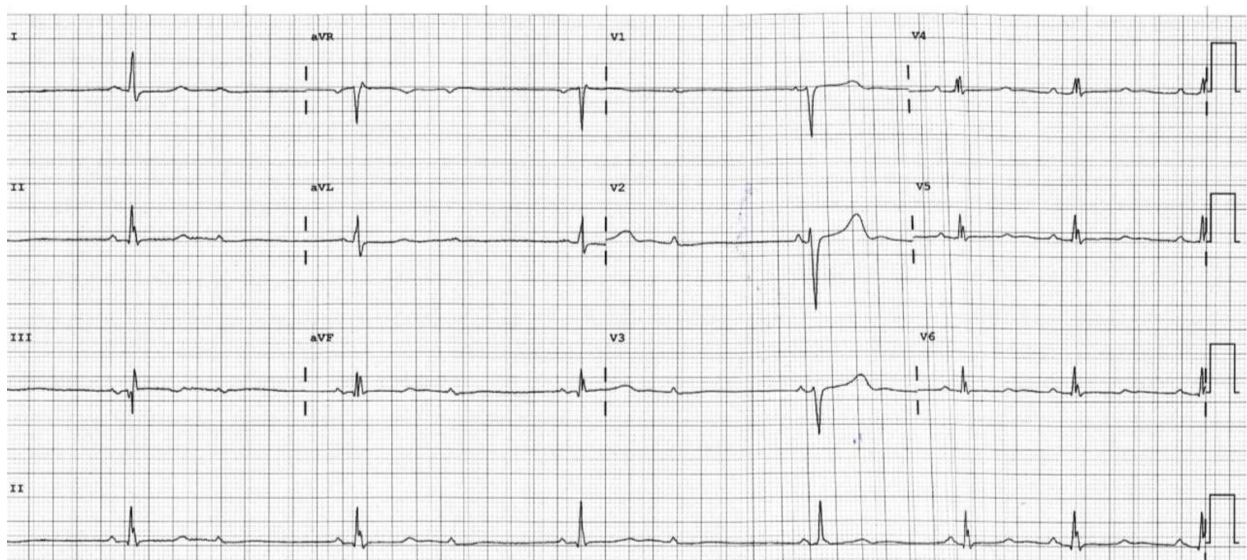



## INTERPRET-AF\_12-lead\_ECG

\* 22. How would you classify the following measurement?

- ☐ Regular rhythm      ☐ One or more ectopic/missed heartbeats      ☐ Atrial flutter      ☐ Atrial fibrillation      ☐ Unreadable
- ☐ Other (please specify)

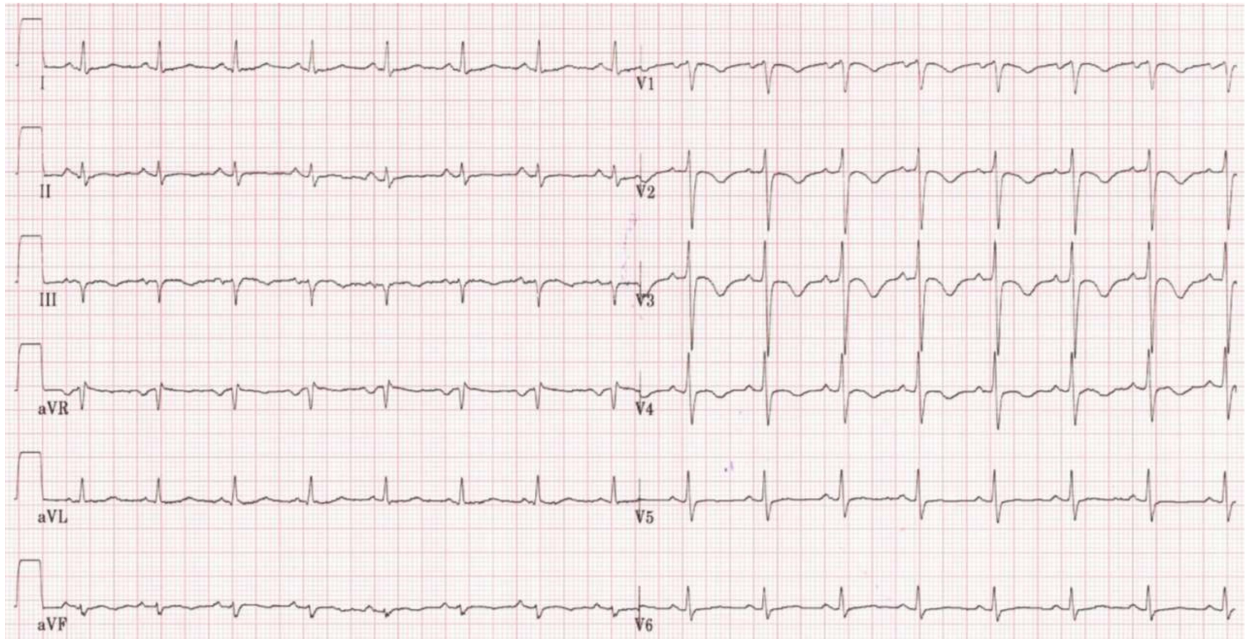

## INTERPRET-AF\_12-lead\_ECG

\* 23. How would you classify the following measurement?

- ☐ Regular rhythm      ☐ One or more ectopic/missed heartbeats      ☐ Atrial flutter      ☐ Atrial fibrillation      ☐ Unreadable
- ☐ Other (please specify)

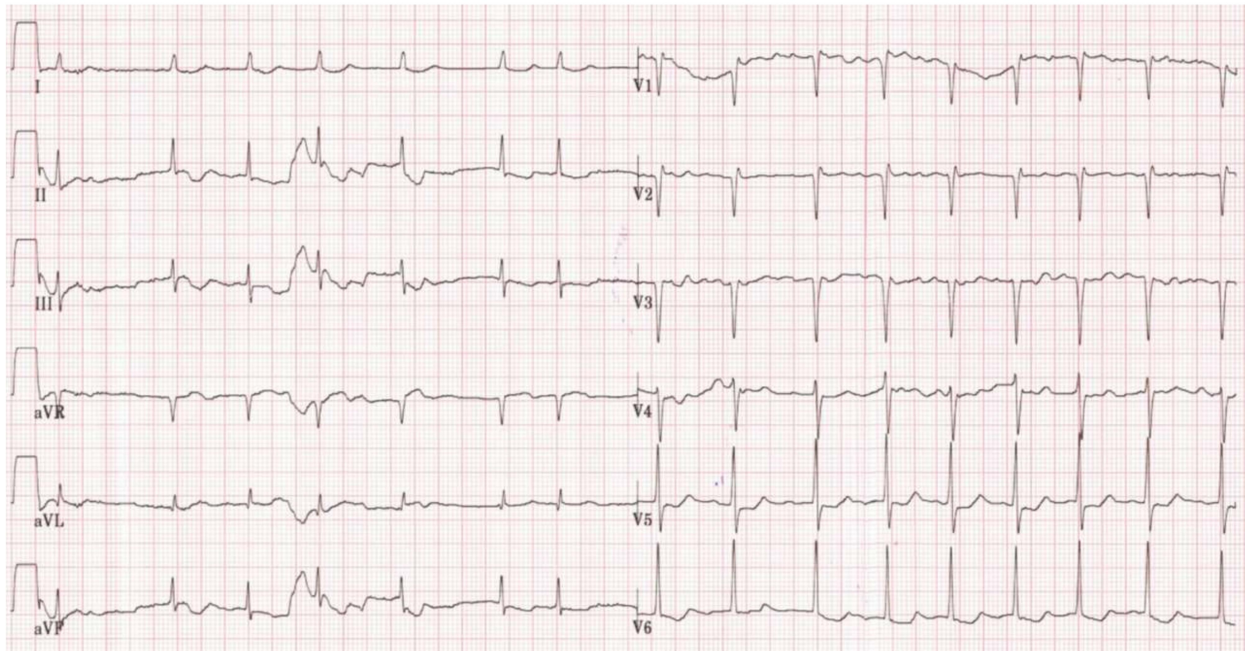

## INTERPRET-AF\_12-lead\_ECG

\* 24. How would you classify the following measurement?

- ☐ Regular rhythm      ☐ One or more ectopic/missed heartbeats      ☐ Atrial flutter      ☐ Atrial fibrillation      ☐ Unreadable
- ☐ Other (please specify)

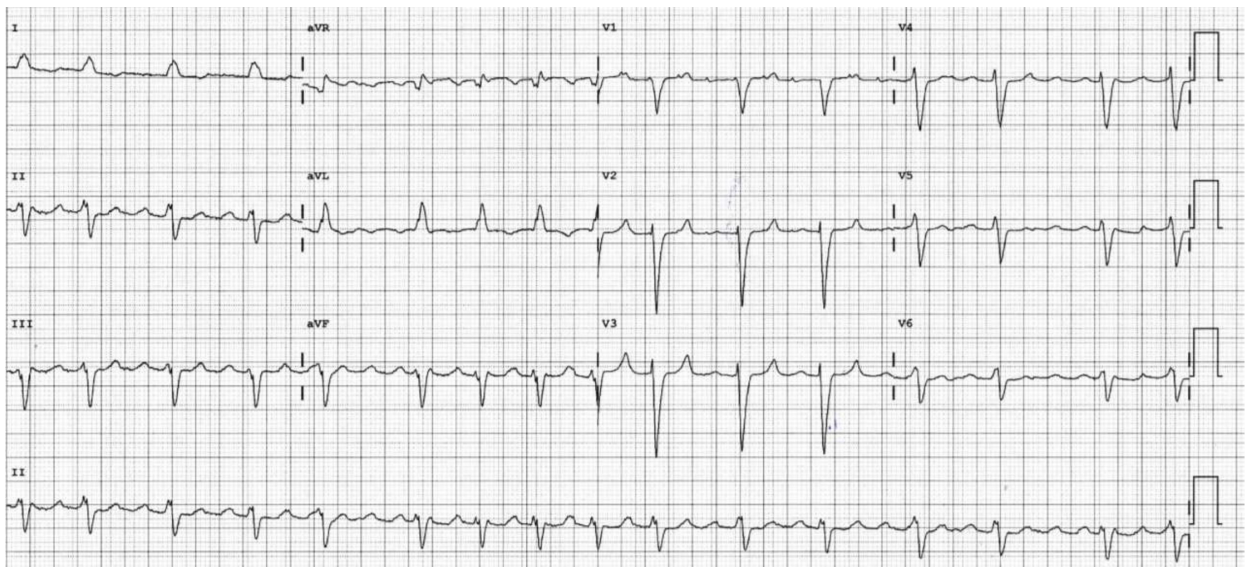



## INTERPRET-AF\_12-lead\_ECG

\* 25. How would you classify the following measurement?

- ☐ Regular rhythm      ☐ One or more ectopic/missed heartbeats      ☐ Atrial flutter      ☐ Atrial fibrillation      ☐ Unreadable
- ☐ Other (please specify)

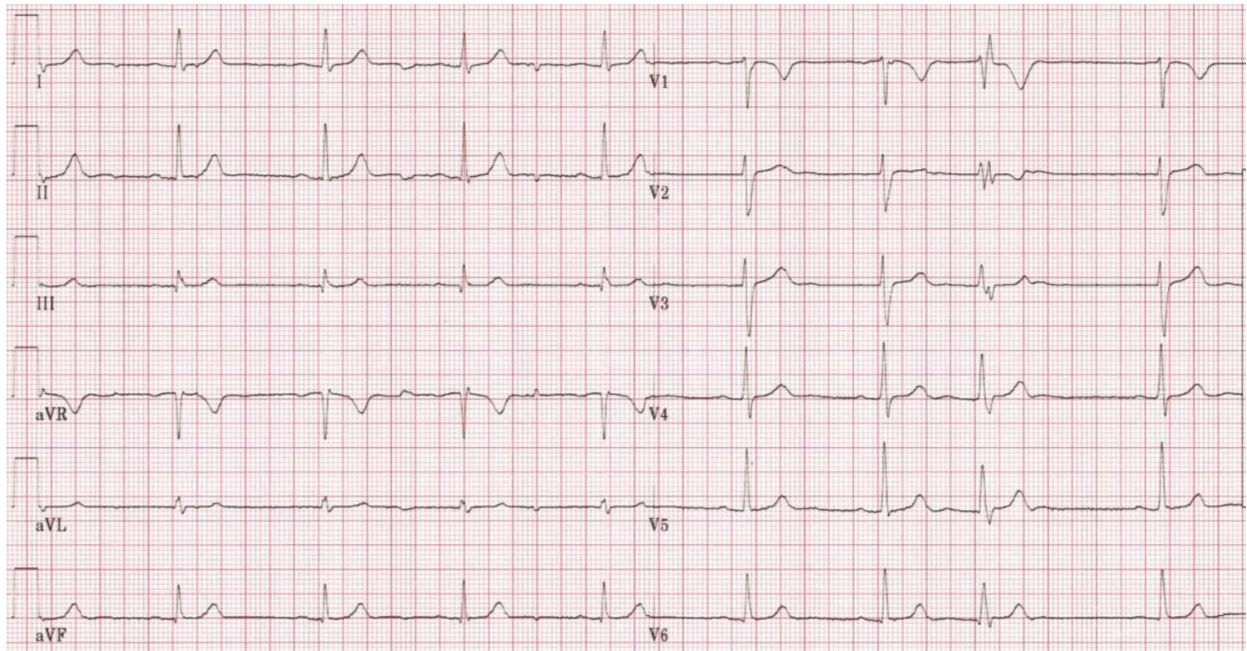



## INTERPRET-AF\_12-lead\_ECG

\* 26. How would you classify the following measurement?

- ☐ Regular rhythm      ☐ One or more ectopic/missed heartbeats      ☐ Atrial flutter      ☐ Atrial fibrillation      ☐ Unreadable
- ☐ Other (please specify)

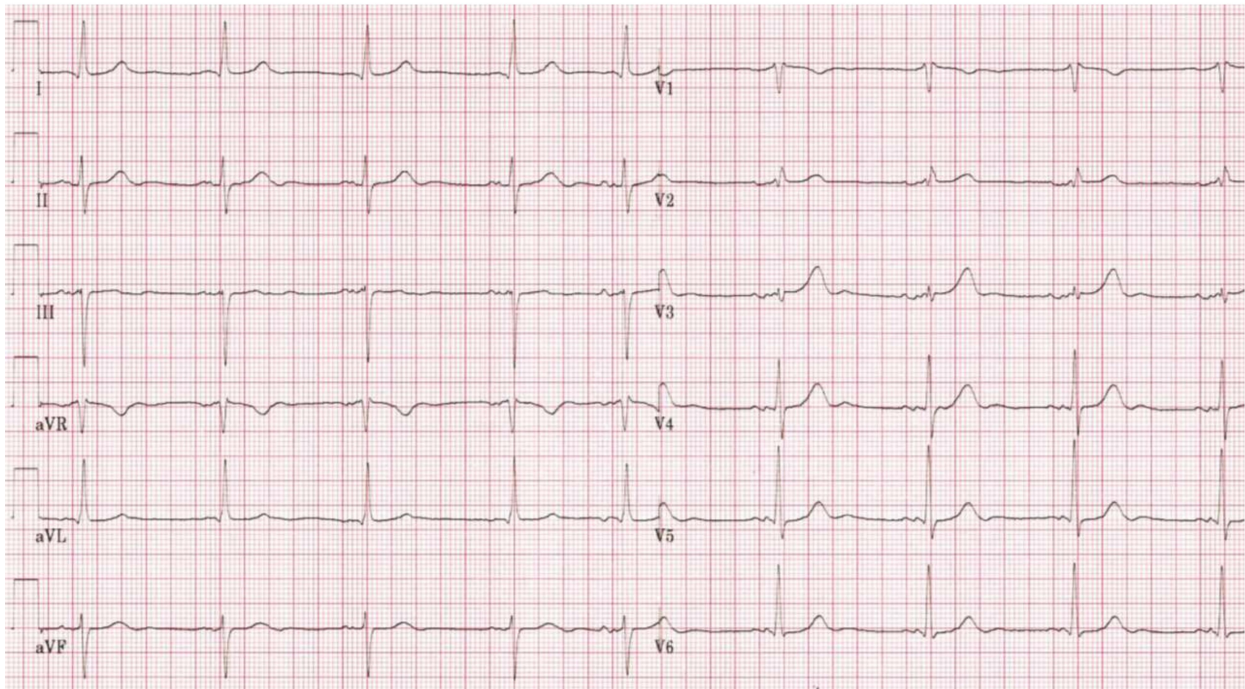

## INTERPRET-AF\_12-lead\_ECG

\* 27. How would you classify the following measurement?

- ☐ Regular rhythm      ☐ One or more ectopic/missed heartbeats      ☐ Atrial flutter      ☐ Atrial fibrillation      ☐ Unreadable
- ☐ Other (please specify)

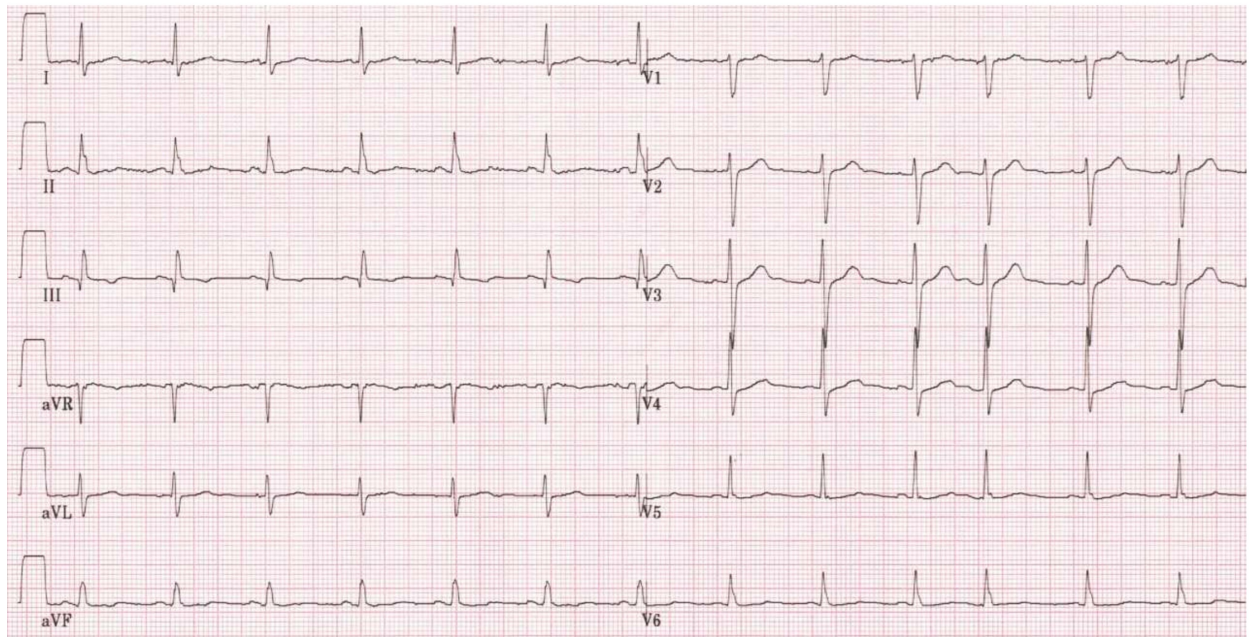

## INTERPRET-AF\_12-lead\_ECG

\* 28. How would you classify the following measurement?

- ☐ Regular rhythm      ☐ One or more ectopic/missed heartbeats      ☐ Atrial flutter      ☐ Atrial fibrillation      ☐ Unreadable
- ☐ Other (please specify)

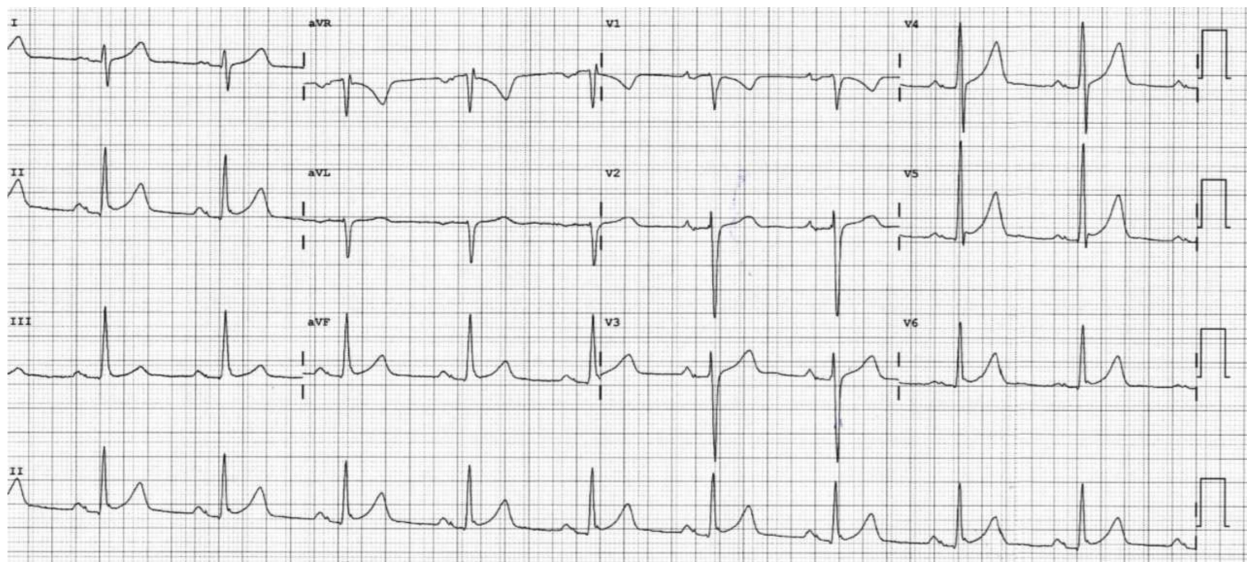



## INTERPRET-AF\_12-lead\_ECG

\* 29. How would you classify the following measurement?

- ☐ Regular rhythm      ☐ One or more ectopic/missed heartbeats      ☐ Atrial flutter      ☐ Atrial fibrillation      ☐ Unreadable
- ☐ Other (please specify)

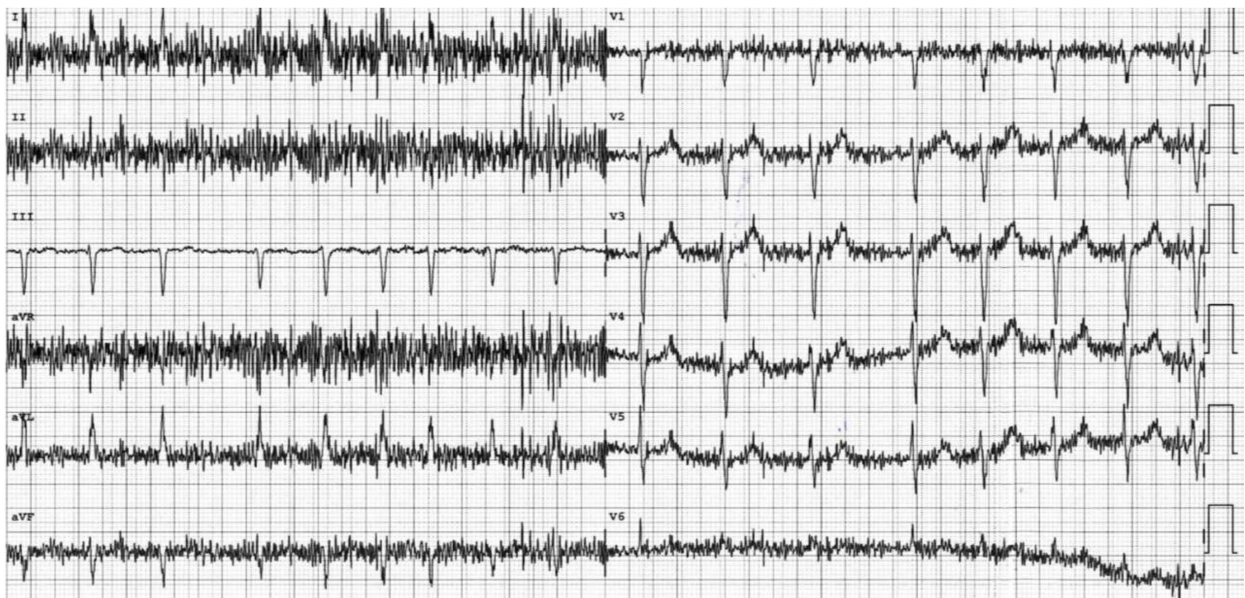



## INTERPRET-AF\_12-lead\_ECG

\* 30. How would you classify the following measurement?

- ☐ Regular rhythm      ☐ One or more ectopic/missed heartbeats      ☐ Atrial flutter      ☐ Atrial fibrillation      ☐ Unreadable
- ☐ Other (please specify)

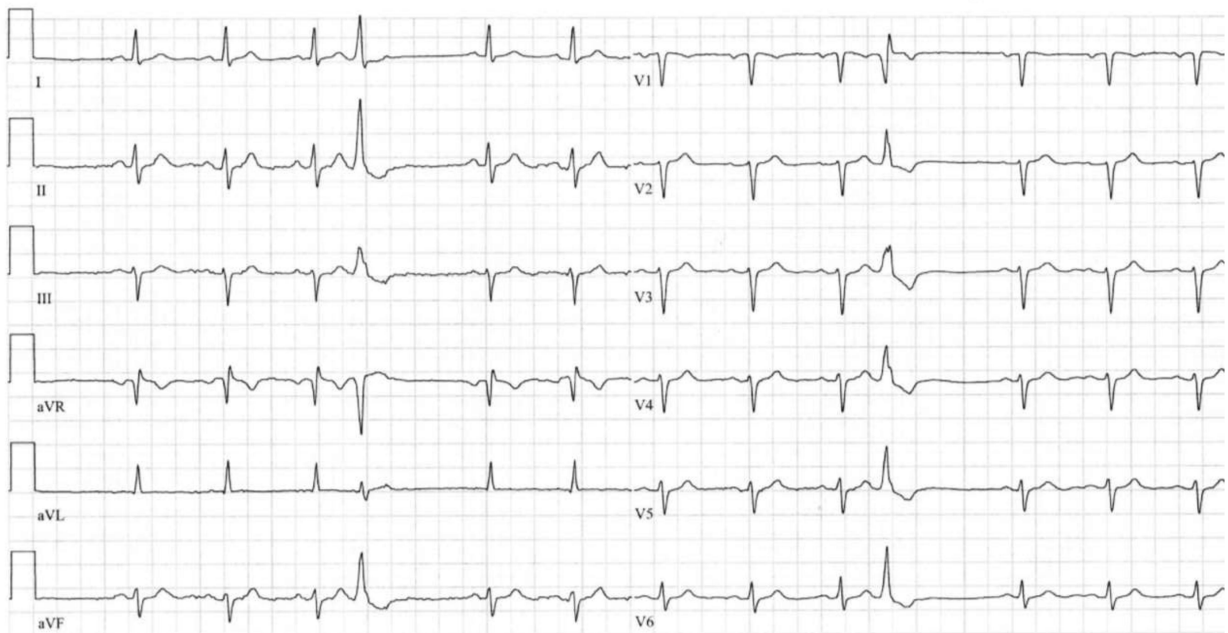

## INTERPRET-AF\_12-lead\_ECG

\* 31. How would you classify the following measurement?

- ☐ Regular rhythm      ☐ One or more ectopic/missed heartbeats      ☐ Atrial flutter      ☐ Atrial fibrillation      ☐ Unreadable
- ☐ Other (please specify)

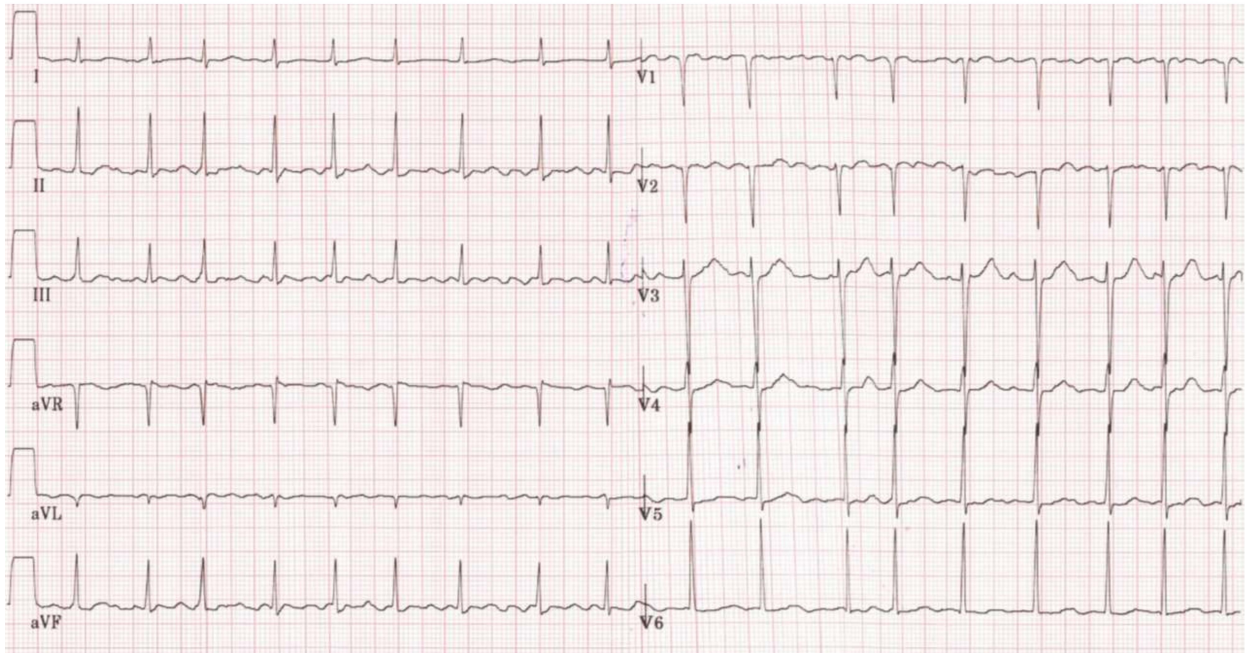

Supplement: Data_Sheet_1.PDF [file Data_Sheet_1.PDF]
