# Supplementary material for: Accuracy of Physicians Interpreting Photoplethysmography and Electrocardiography Tracings to Detect Atrial Fibrillation: INTERPRET-AF
Source: Frontiers journal article supplement (doi:10.3389/fcvm.2021.734737), 2021-09-20

## INTERPRET-AF\_Single-lead\_ECG

\* 2. How would you classify the following measurement?

- ☐ Regular rhythm      ☐ One or more ectopic/missed heartbeats      ☐ Atrial flutter      ☐ Atrial fibrillation      ☐ Unreadable
- ☐ Other (please specify)

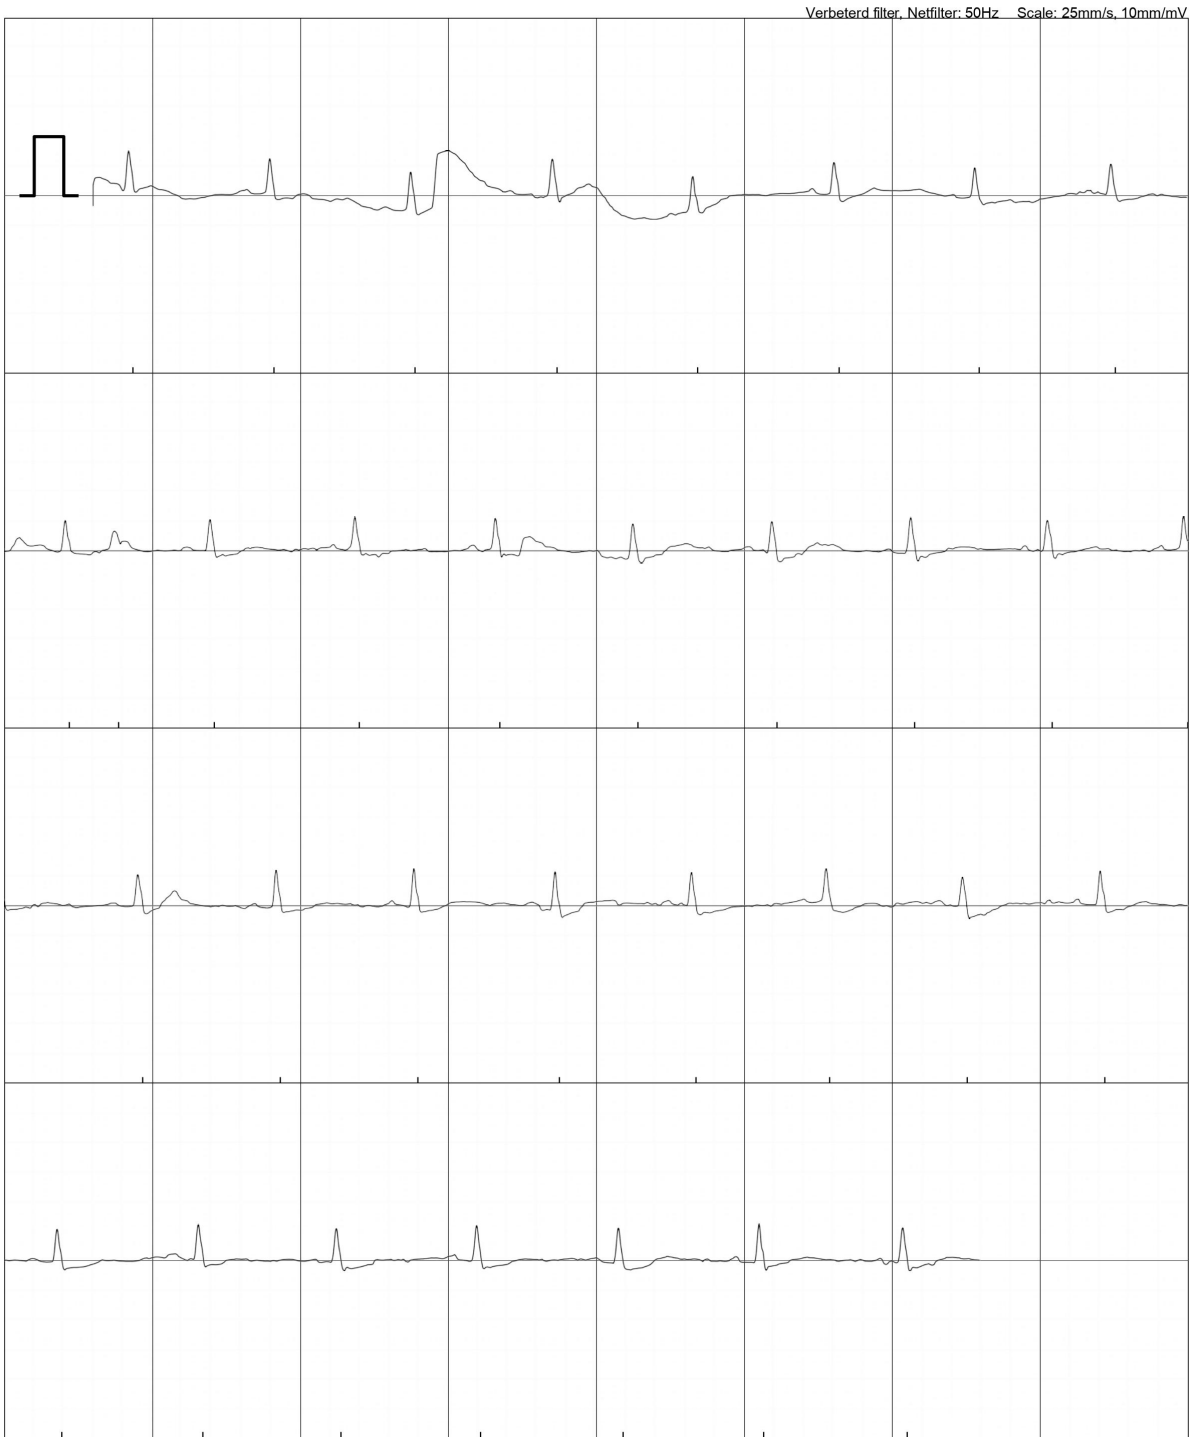

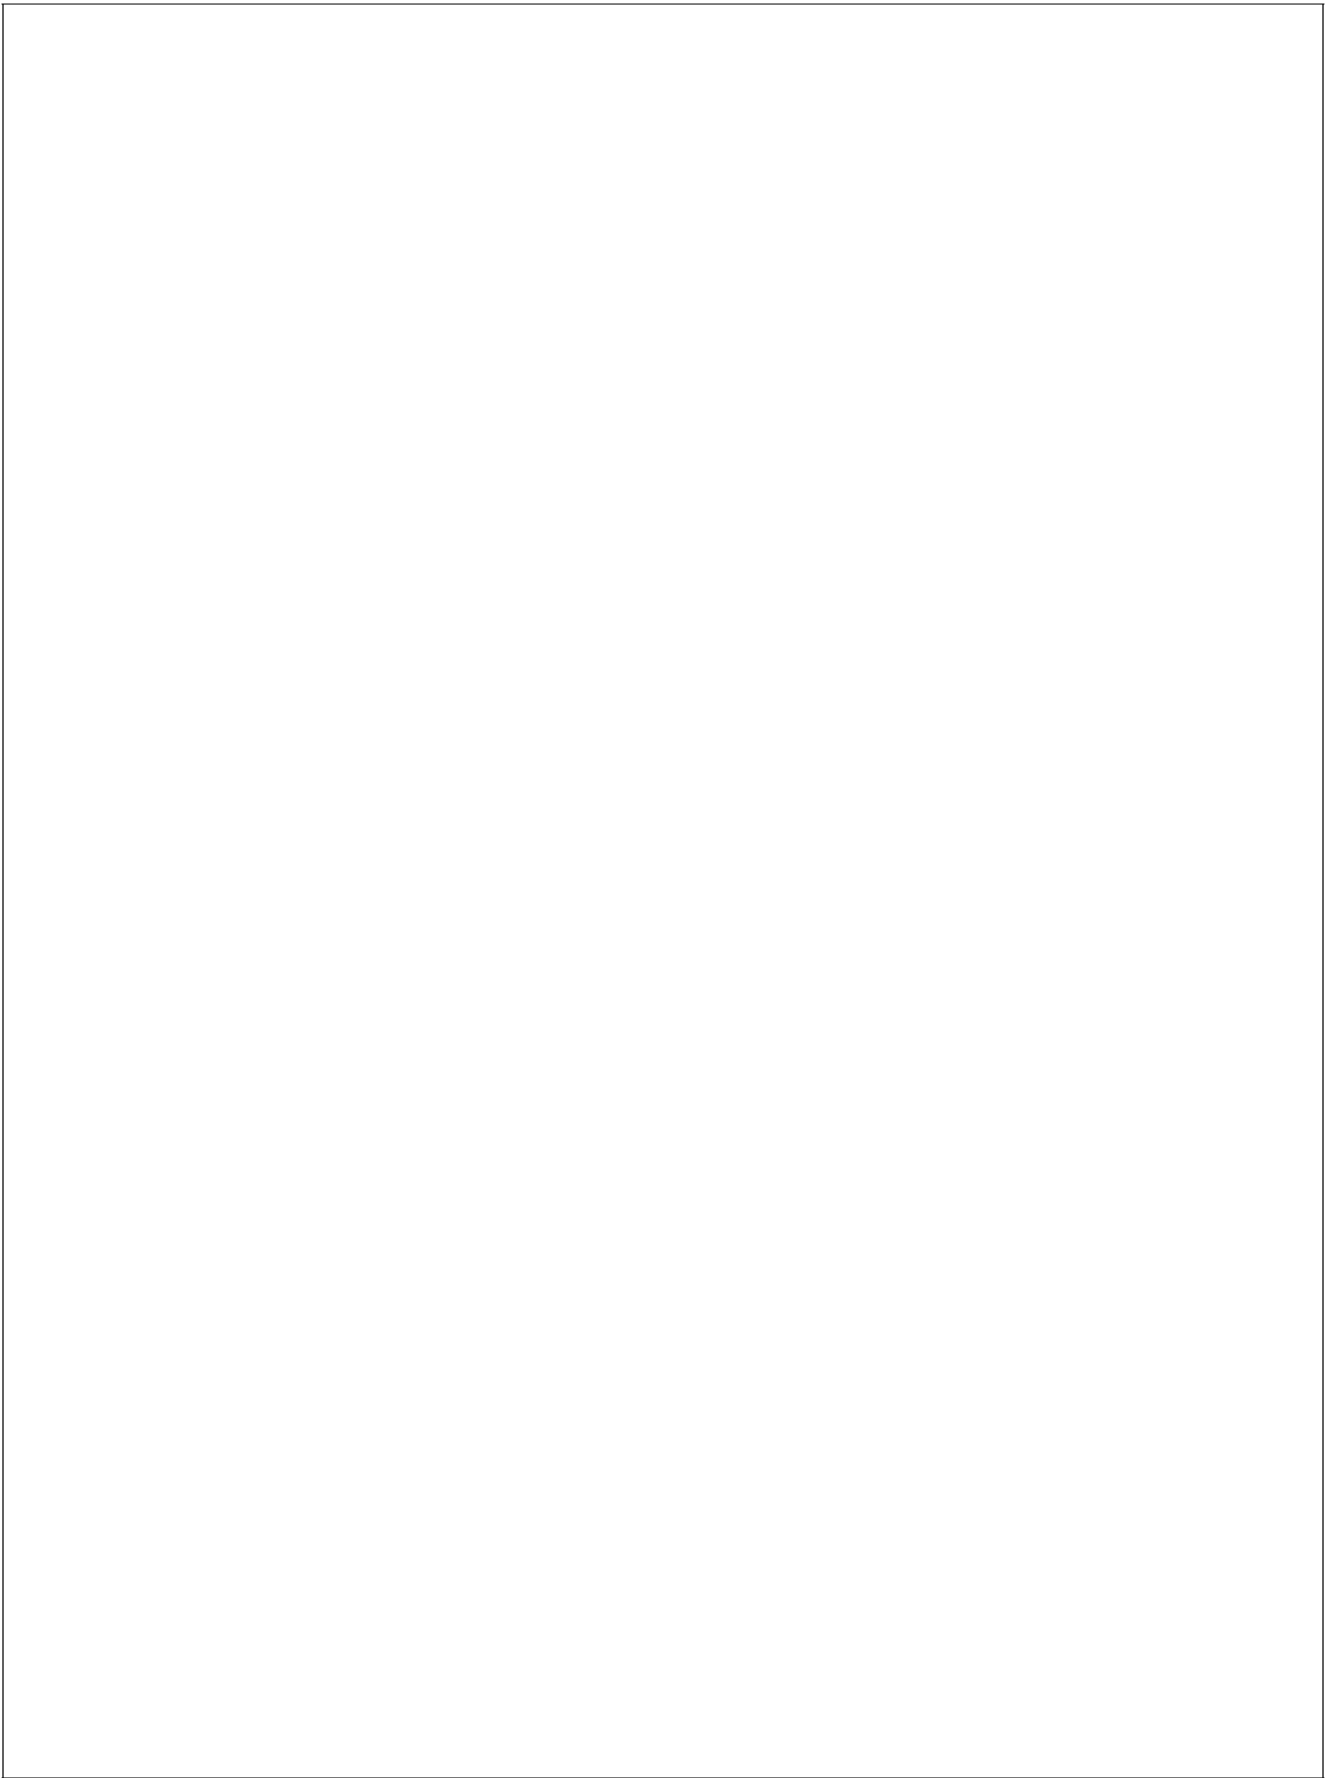

## INTERPRET-AF\_Single-lead\_ECG

\* 3. How would you classify this measurement?

☐ Regular  
rhythm

☐ One or more ectopic/missed  
heartbeats

☐ Atrial  
flutter

☐ Atrial  
fibrillation

☐ Unreadable

☐ Other (please  
specify)



Enhanced filter, Netfilter: 50 Hz    Schaal: 25mm/s, 10mm/mV

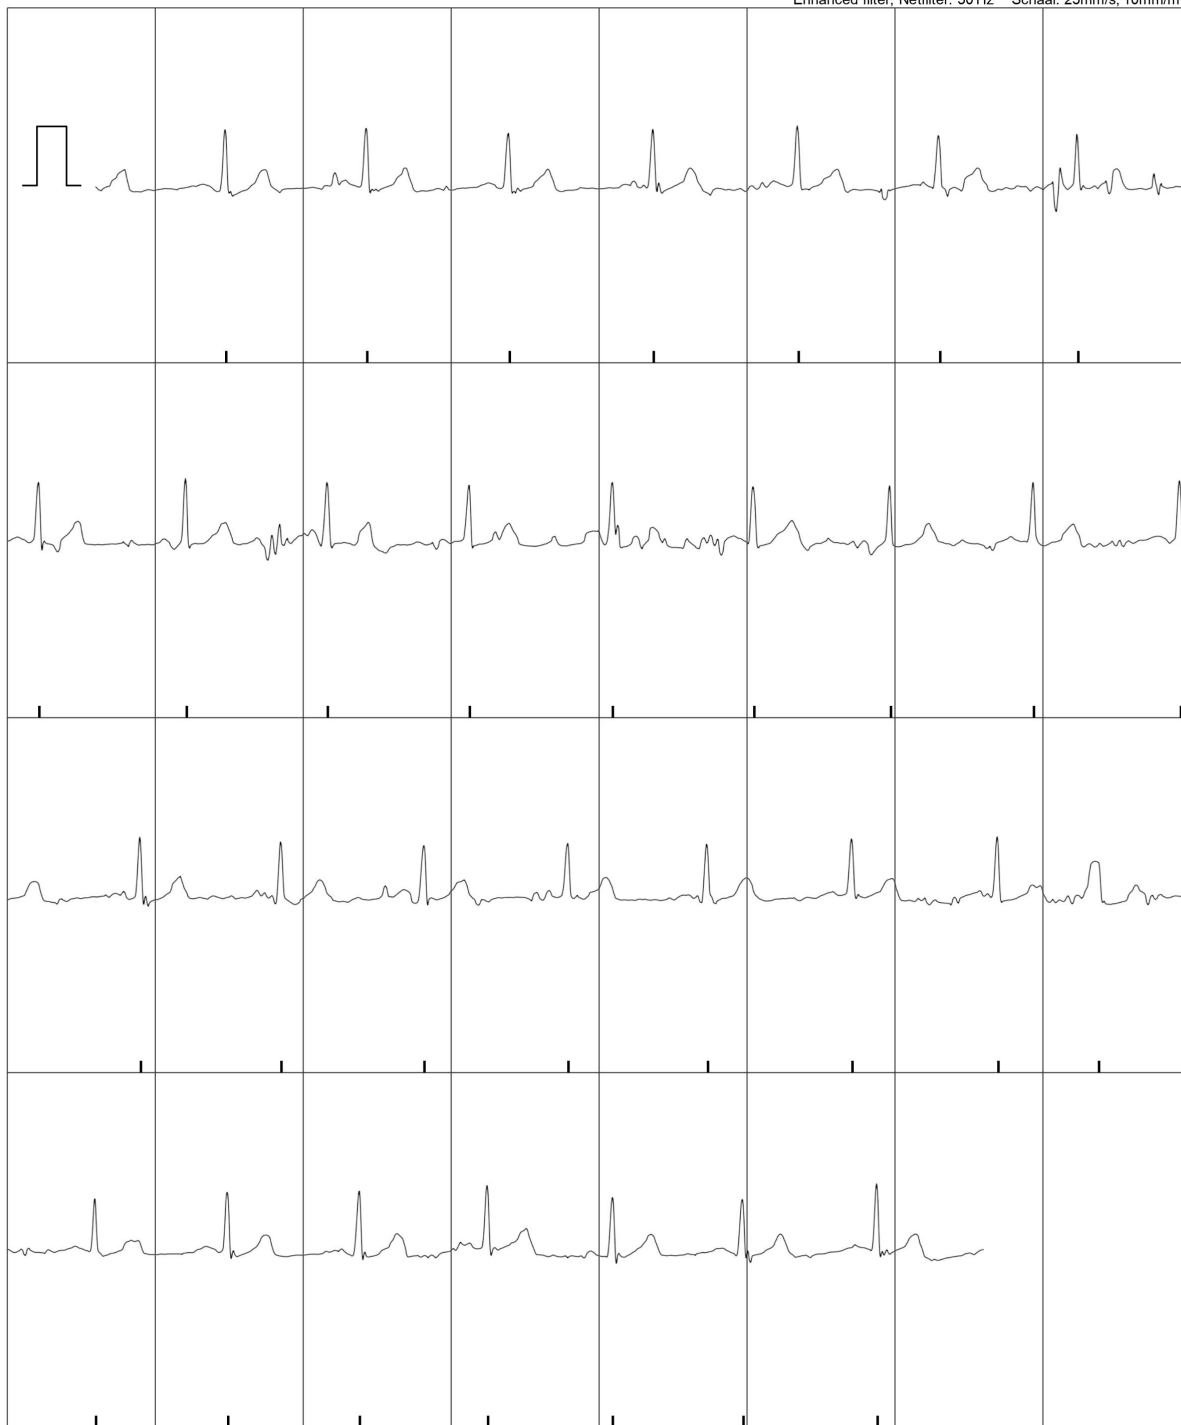

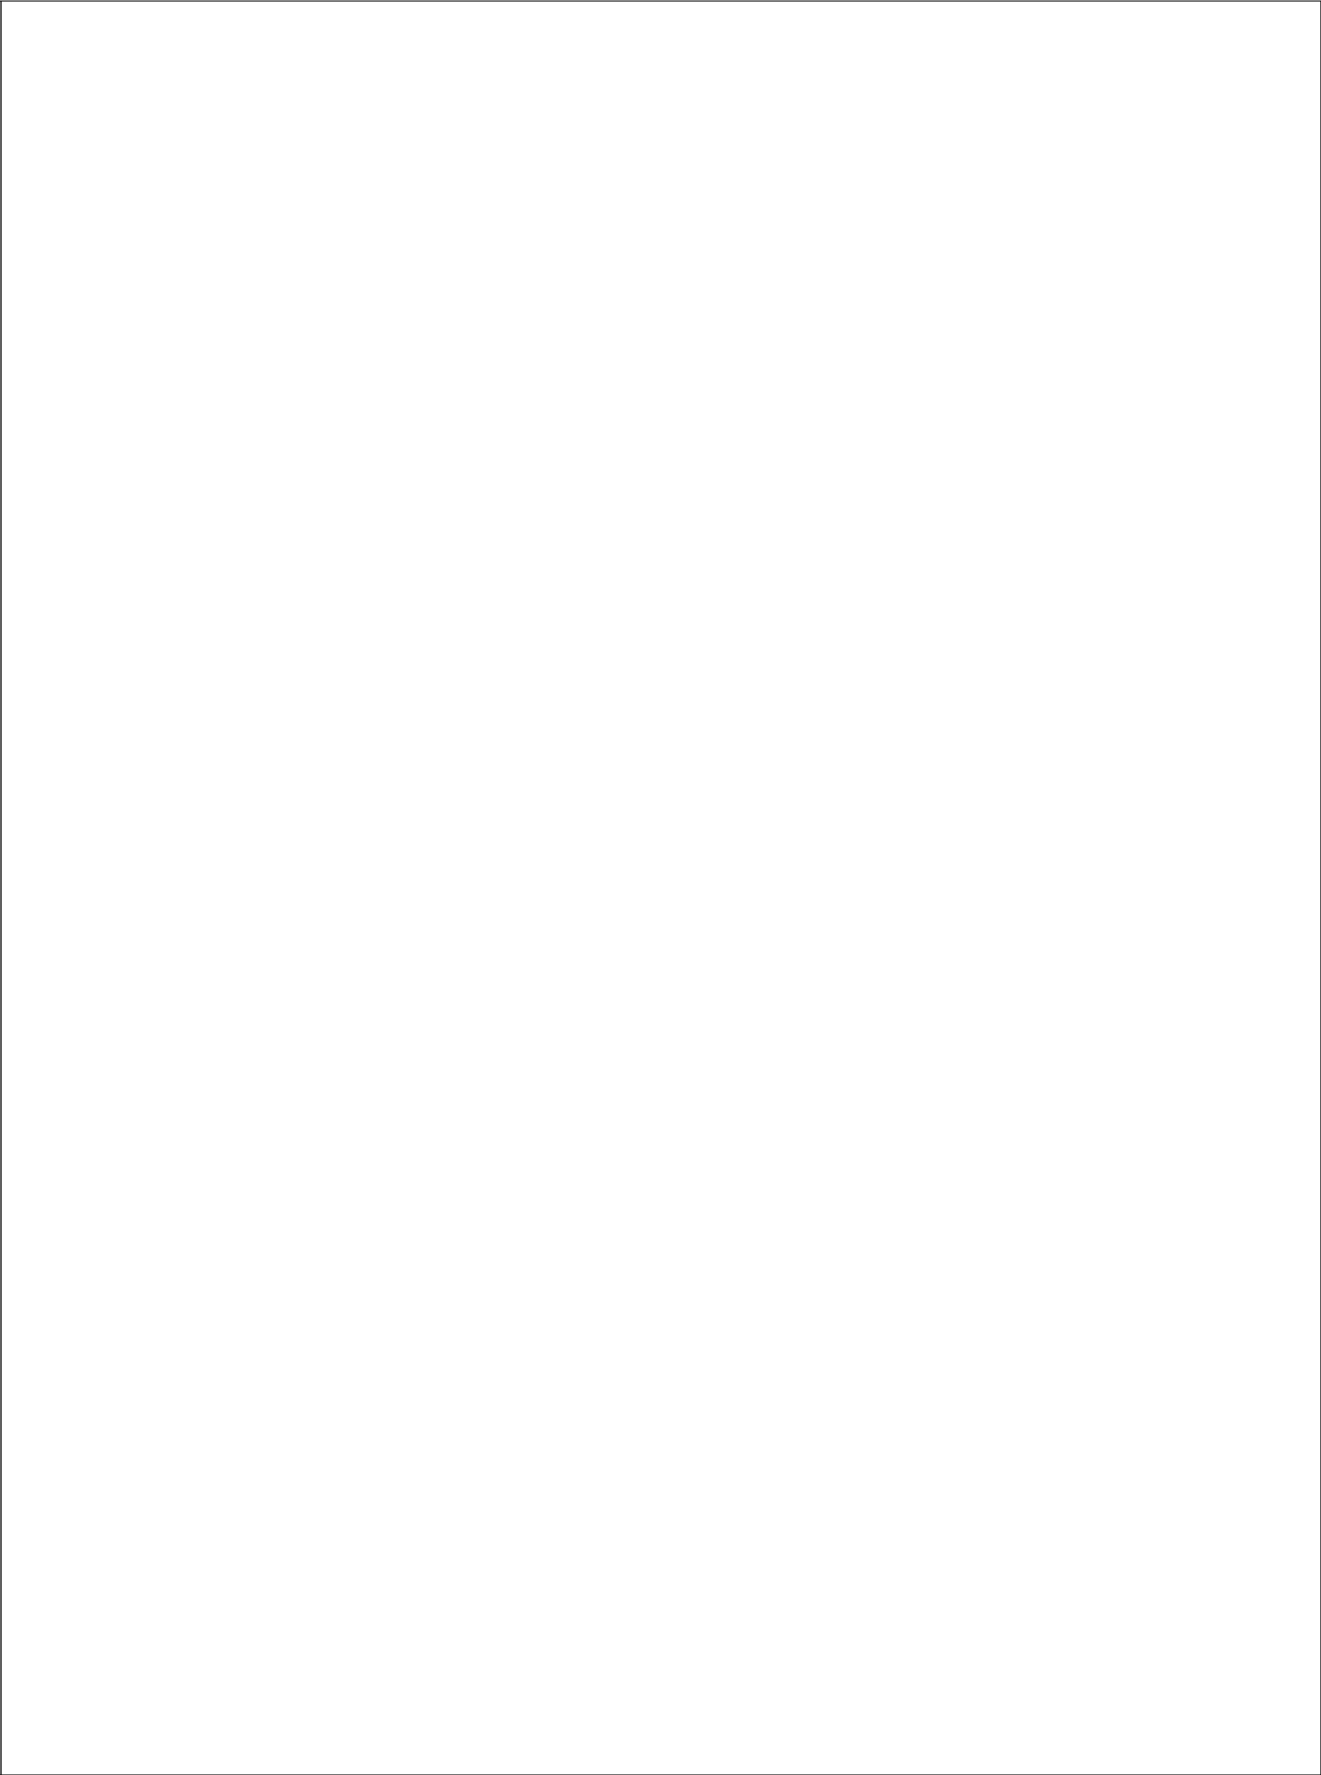

## INTERPRET-AF\_Single-lead\_ECG

\* 4. How would you classify the following measurement?

- ☐ Regular rhythm      ☐ One or more ectopic/missed heartbeats      ☐ Atrial flutter      ☐ Atrial fibrillation      ☐ Unreadable
- ☐ Other (please specify)

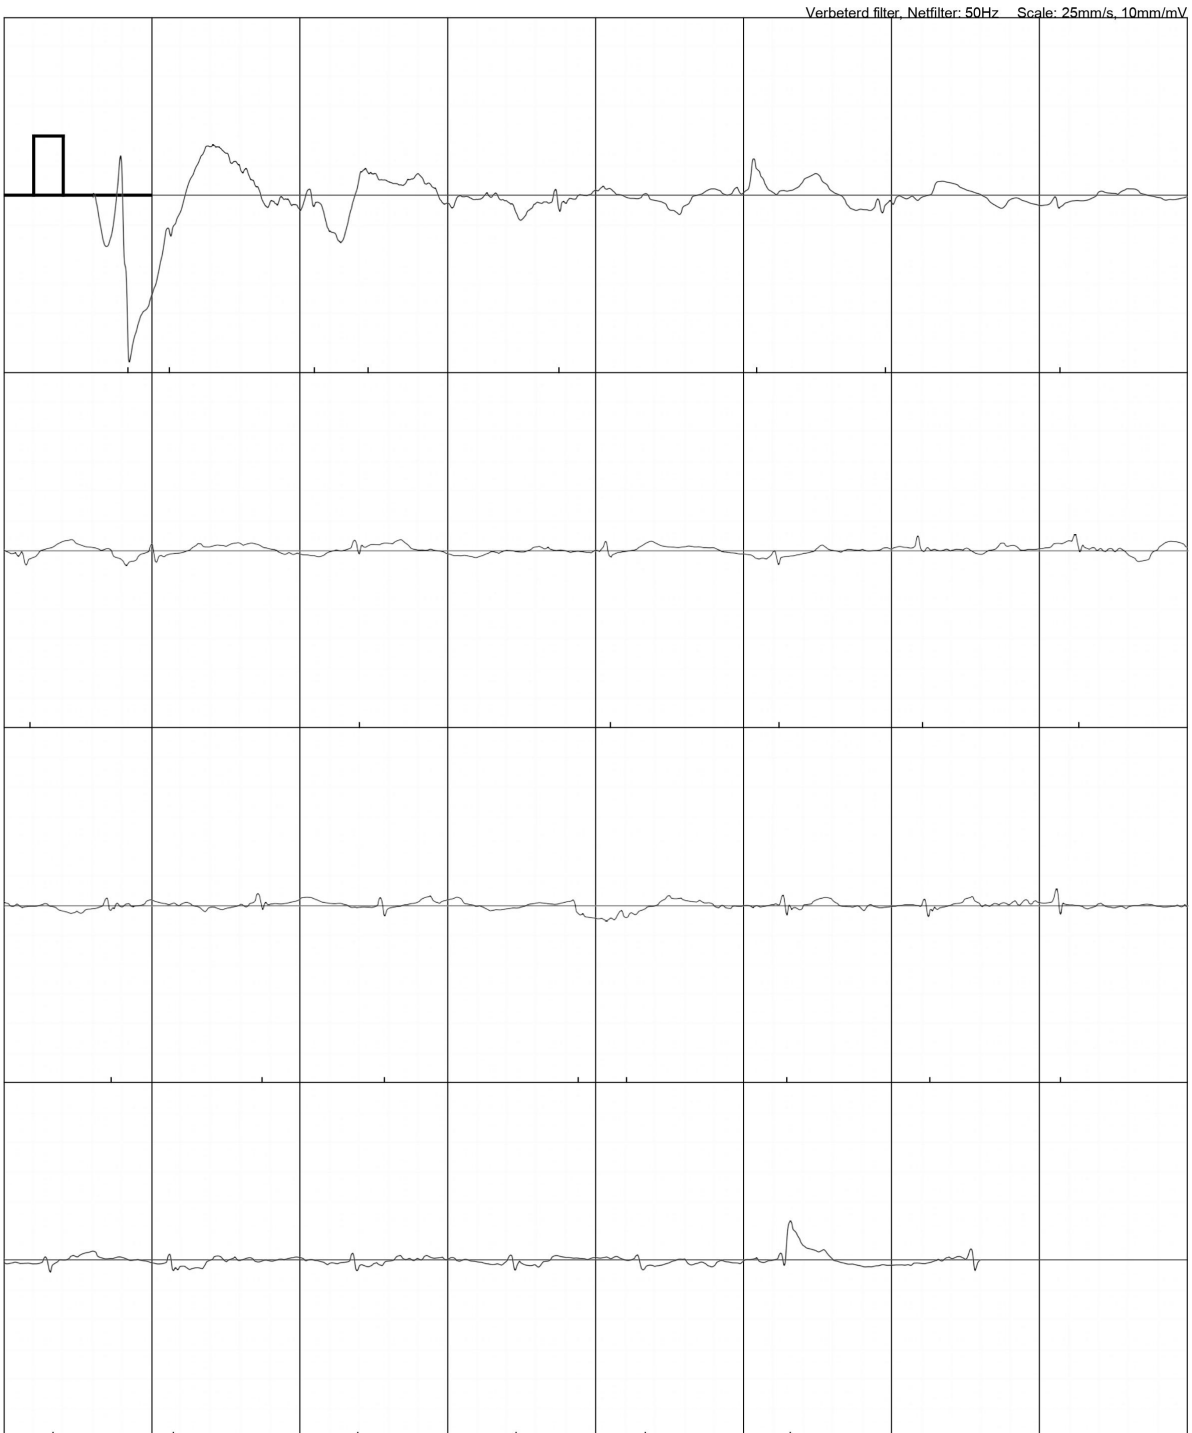

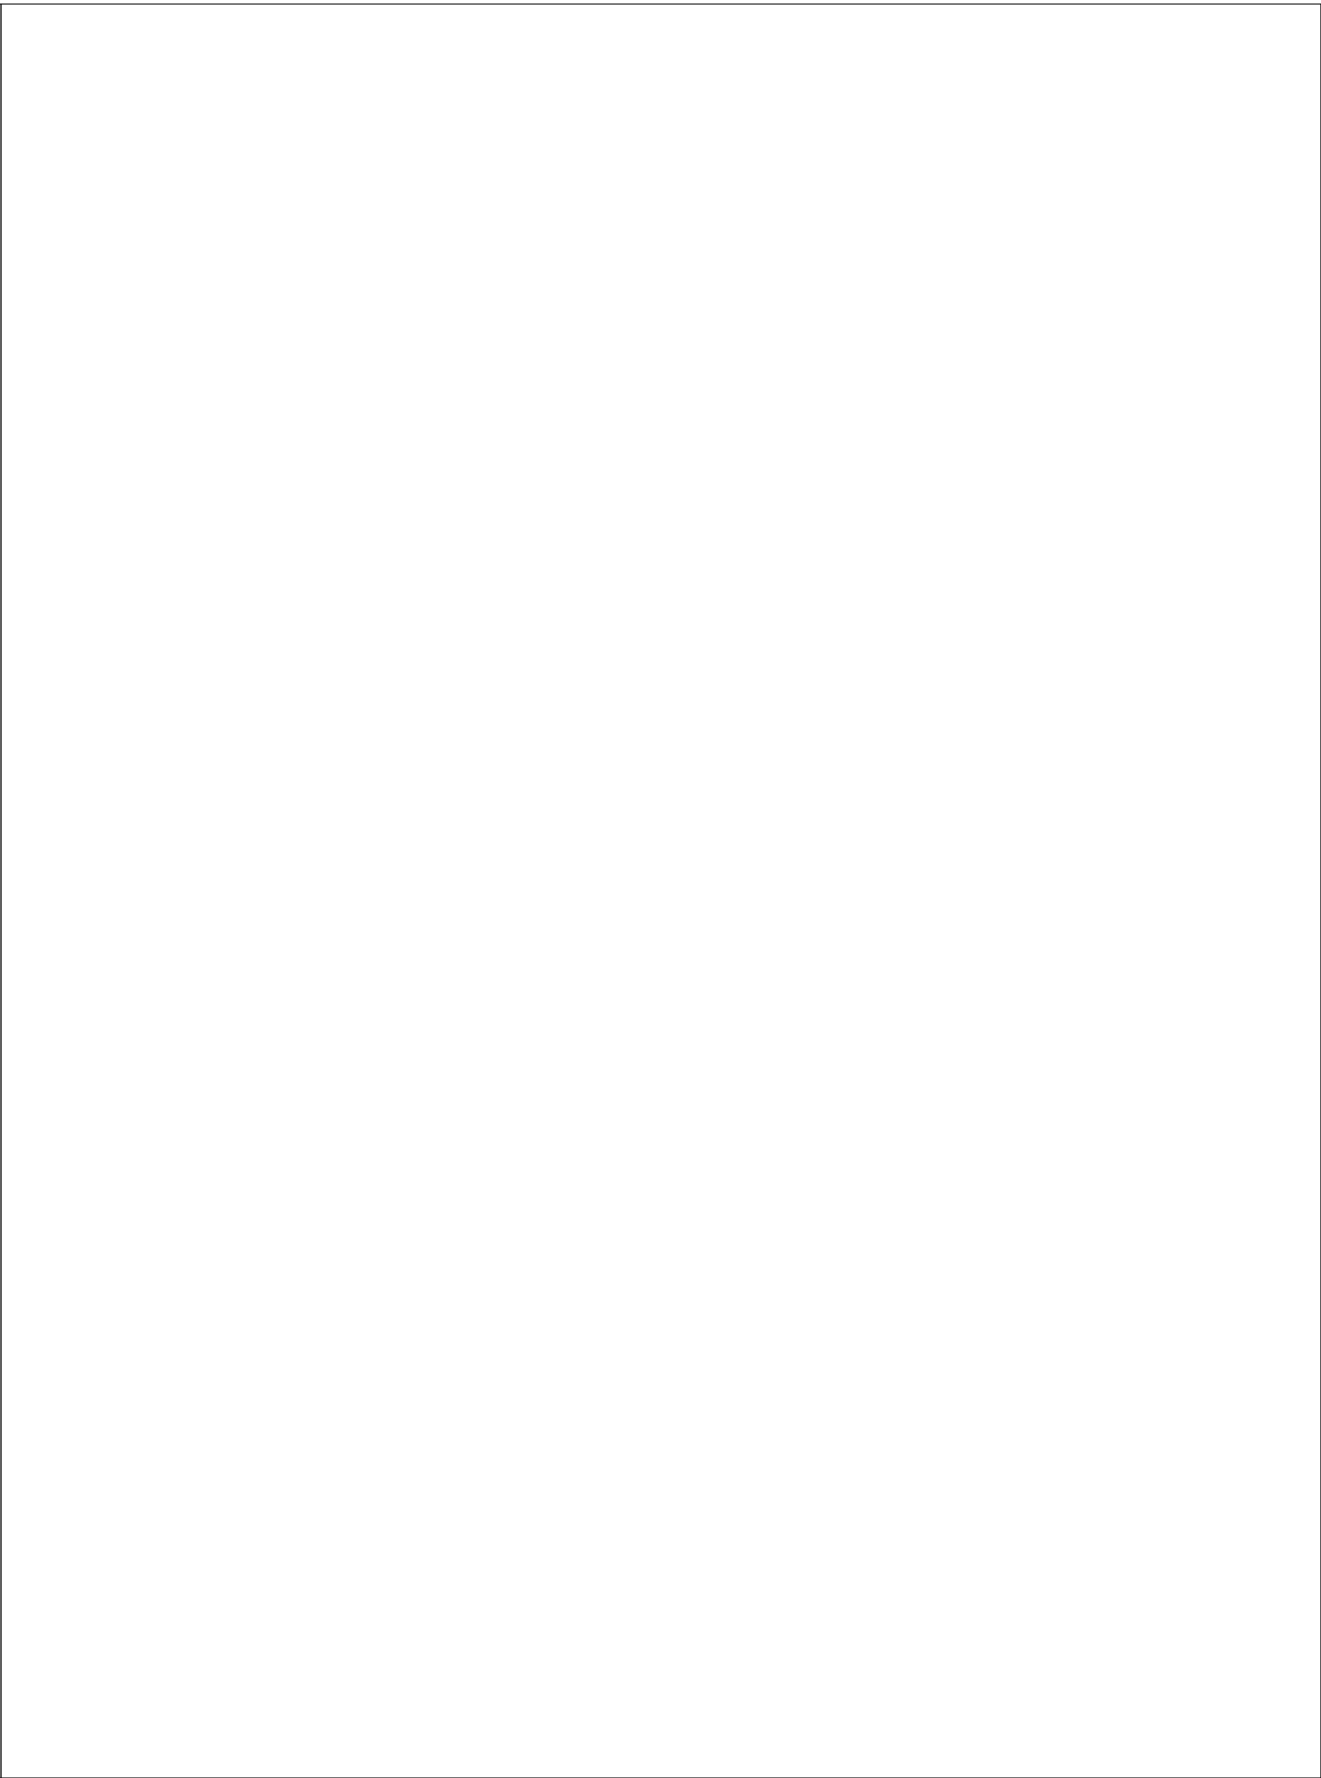

## INTERPRET-AF\_Single-lead\_ECG

\* 5. How would you classify the following measurement?

- ☐ Regular rhythm      ☐ One or more ectopic/missed heartbeats      ☐ Atrial flutter      ☐ Atrial fibrillation      ☐ Unreadable
- ☐ Other (please specify)

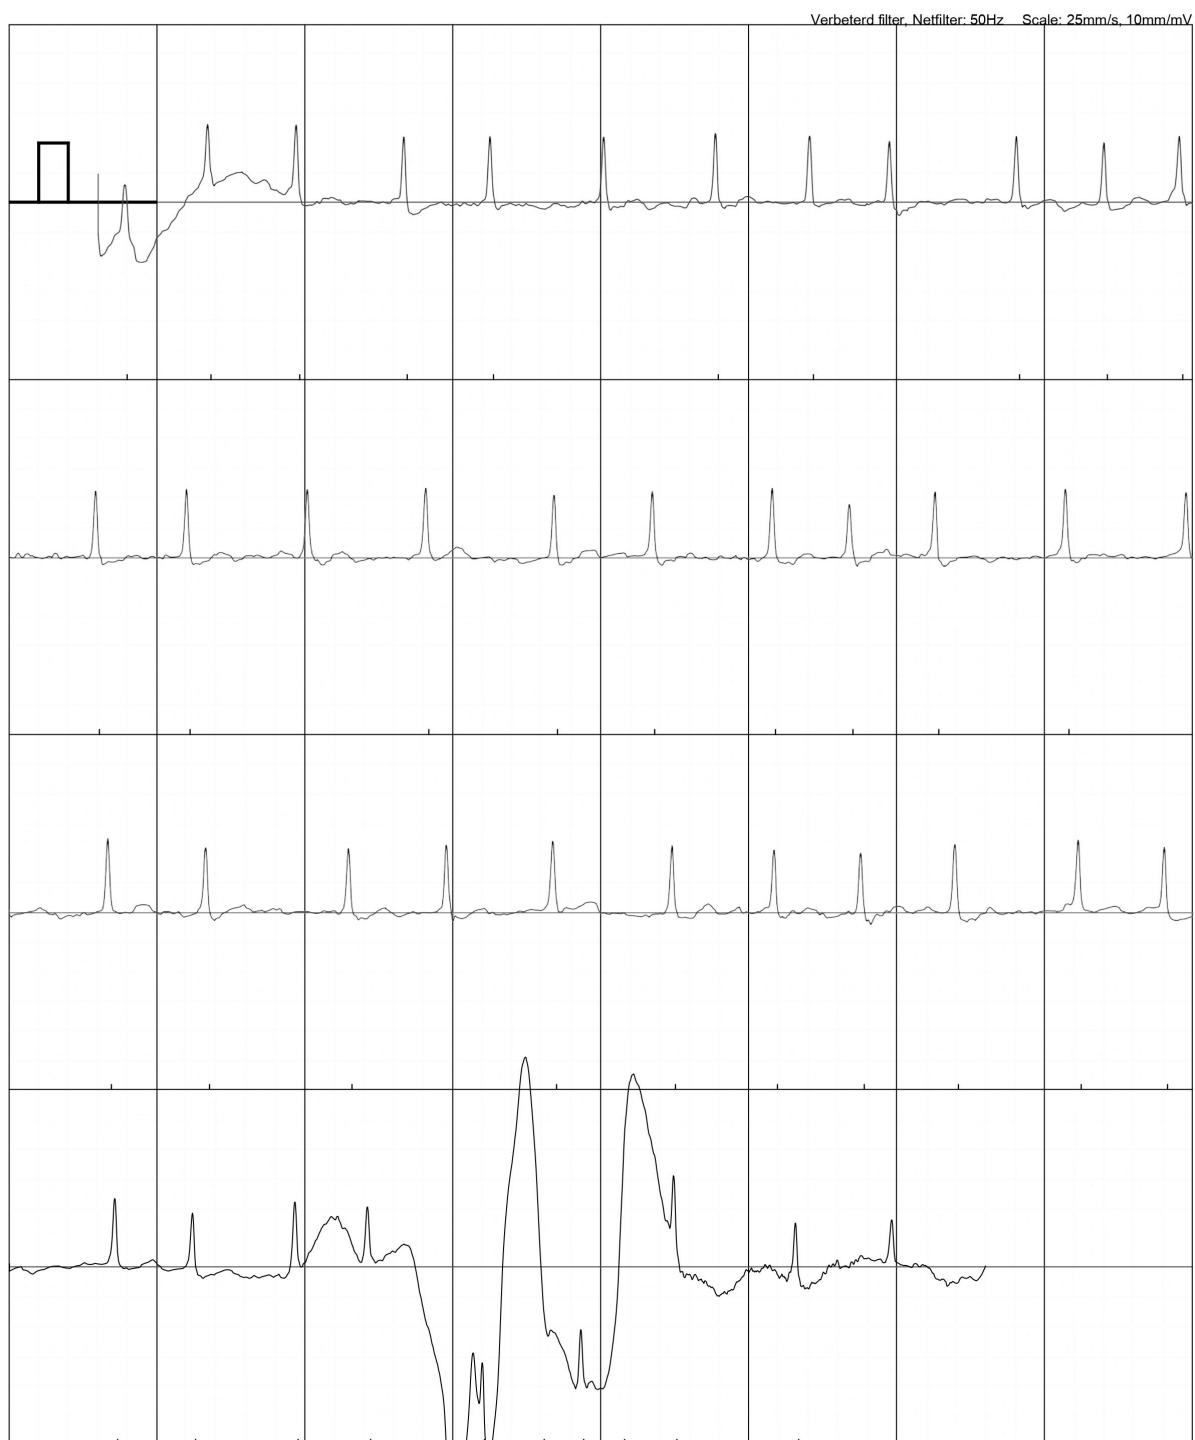





## INTERPRET-AF\_Single-lead\_ECG

\* 6. How would you classify the following measurement?

- ☐ Regular rhythm      ☐ One or more ectopic/missed heartbeats      ☐ Atrial flutter      ☐ Atrial fibrillation      ☐ Unreadable
- ☐ Other (please specify)

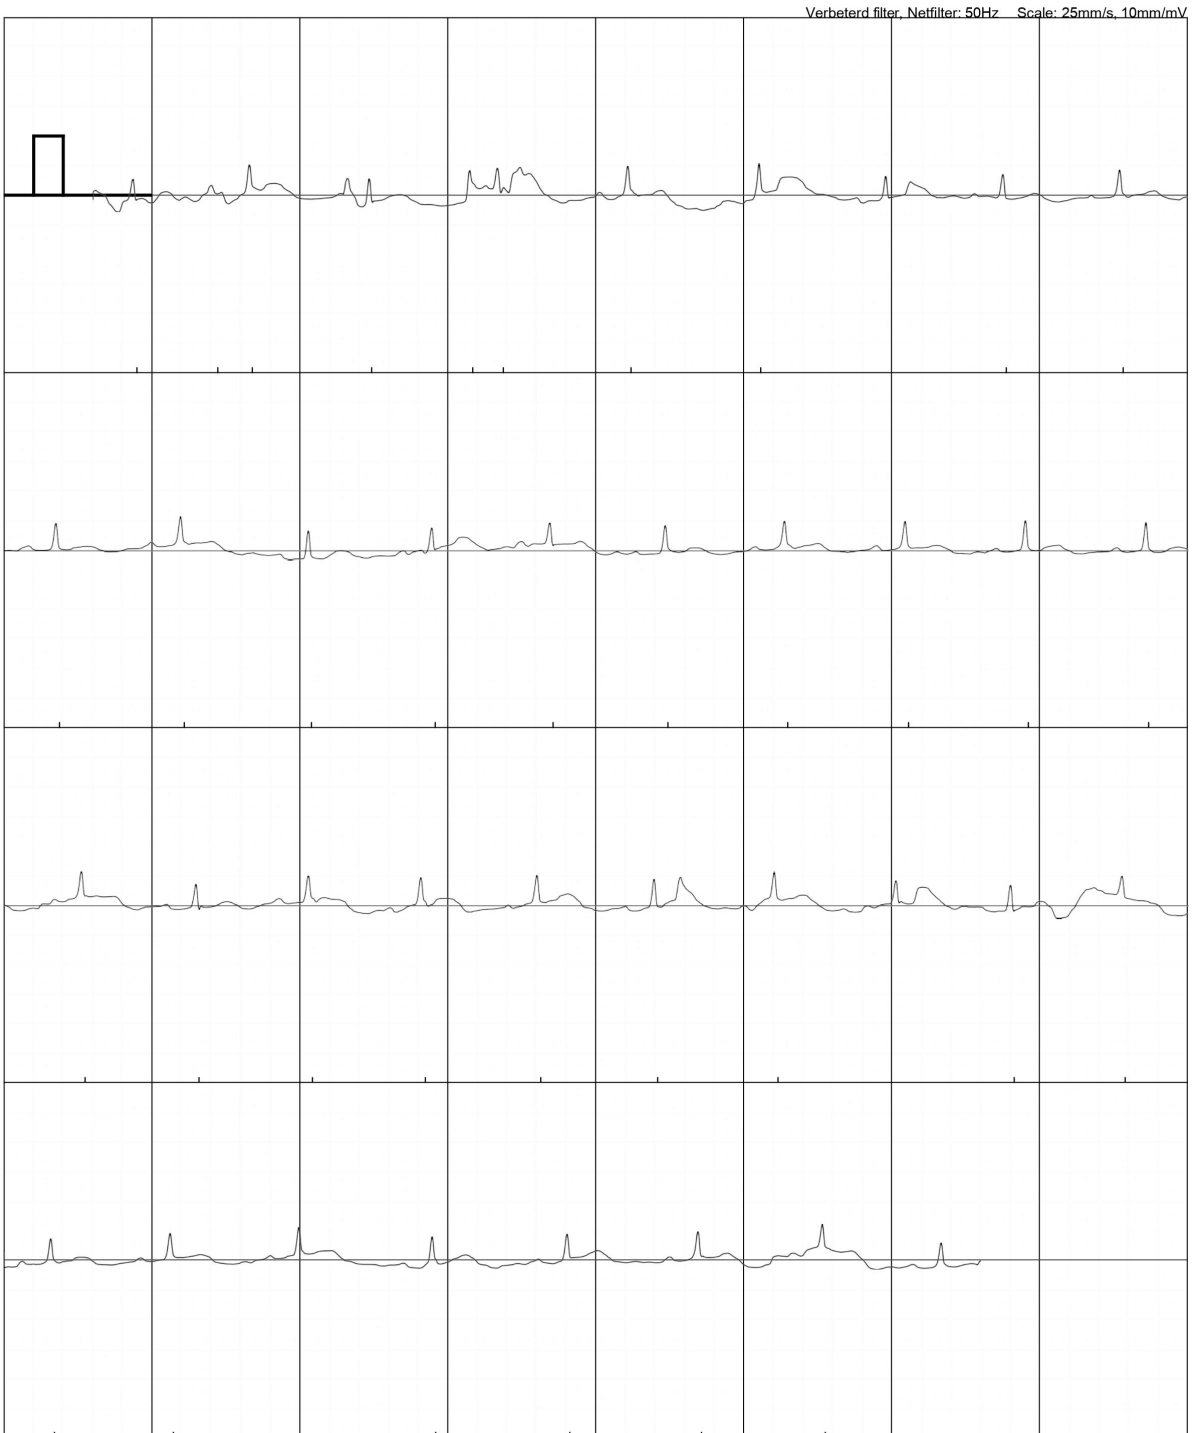



## INTERPRET-AF\_Single-lead\_ECG

\* 7. How would you classify the following measurement?

- ☐ Regular rhythm      ☐ One or more ectopic/missed heartbeats      ☐ Atrial flutter      ☐ Atrial fibrillation      ☐ Unreadable
- ☐ Other (please specify)

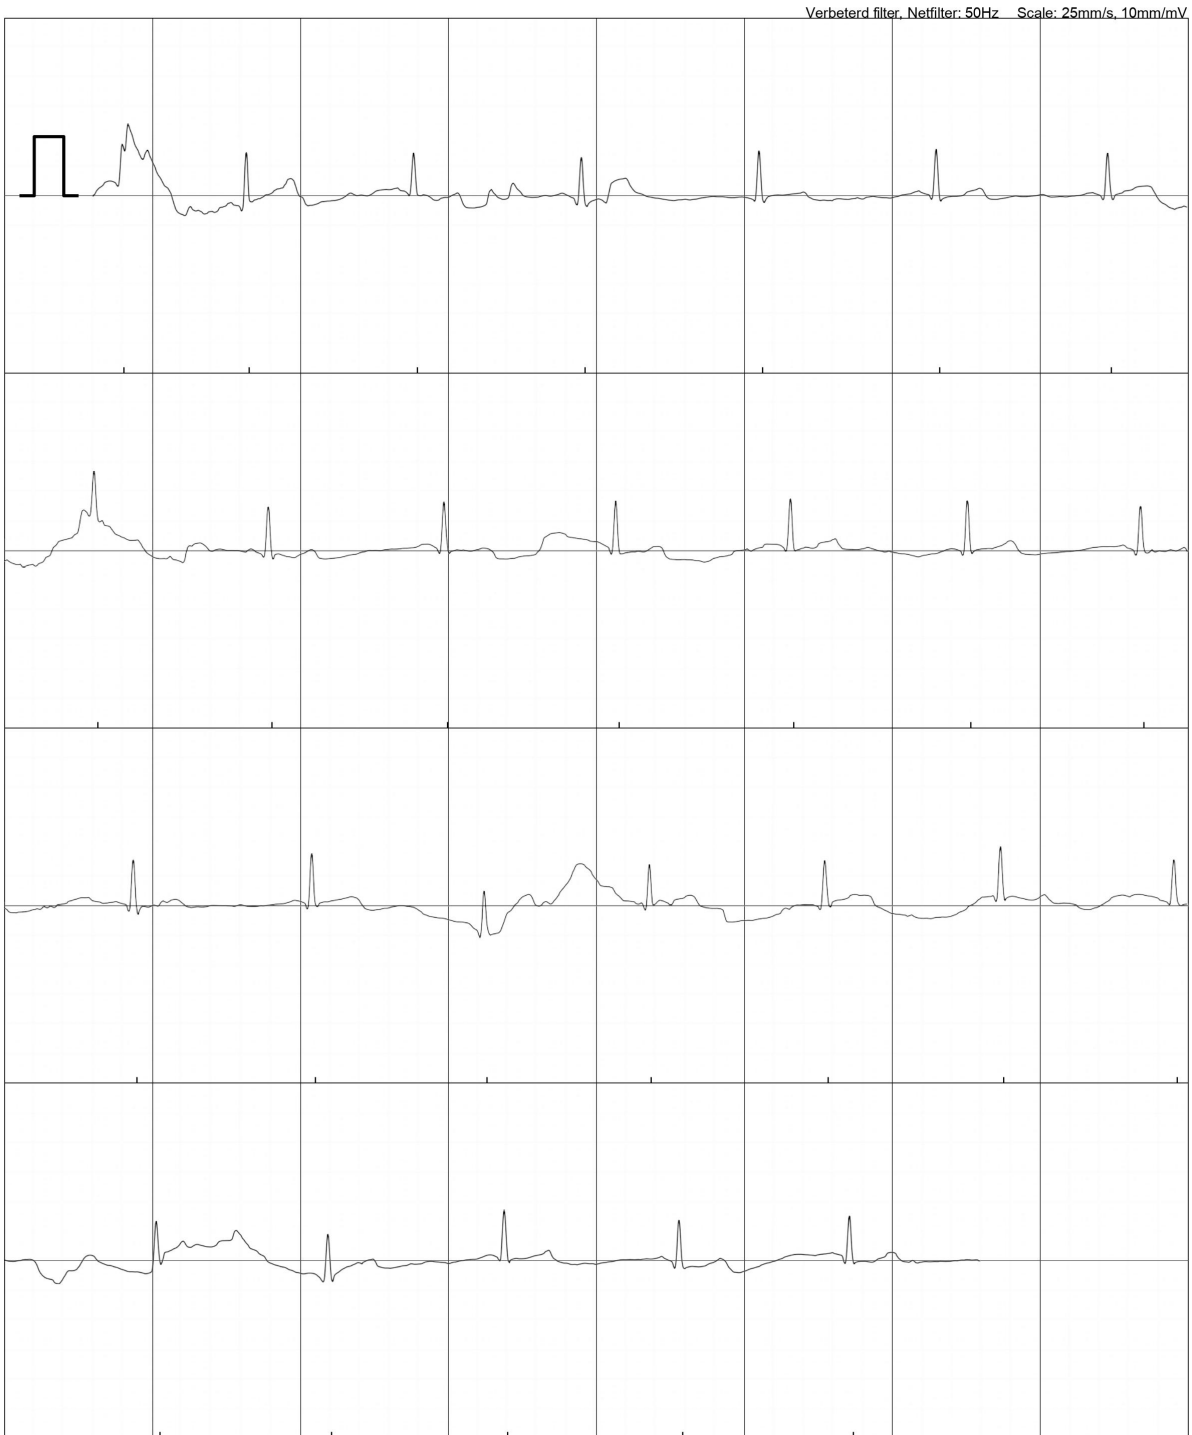



## INTERPRET-AF\_Single-lead\_ECG

\* 8. How would you classify the following measurement?

- ☐ Regular rhythm
- ☐ One or more ectopic/missed heartbeats
- ☐ Atrial flutter
- ☐ Atrial fibrillation
- ☐ Unreadable
- ☐ Other (please specify)

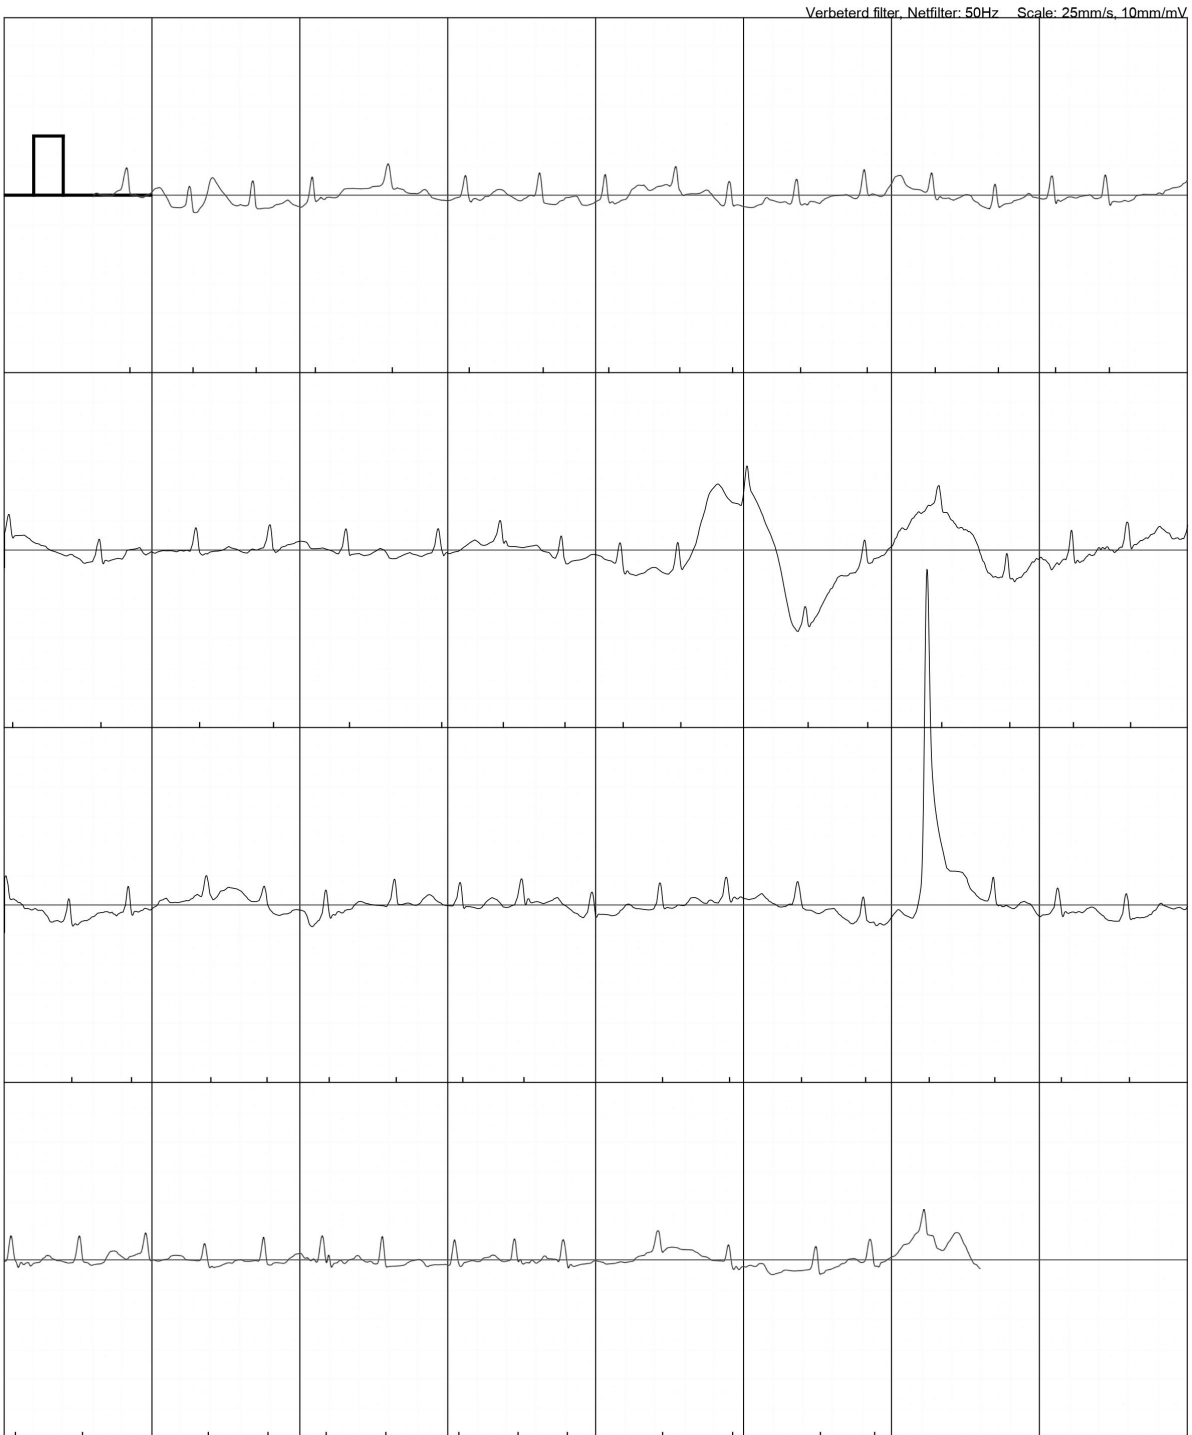





## INTERPRET-AF\_Single-lead\_ECG

\* 9. How would you classify the following measurement?

- ☐ Regular rhythm      ☐ One or more ectopic/missed heartbeats      ☐ Atrial flutter      ☐ Atrial fibrillation      ☐ Unreadable
- ☐ Other (please specify)

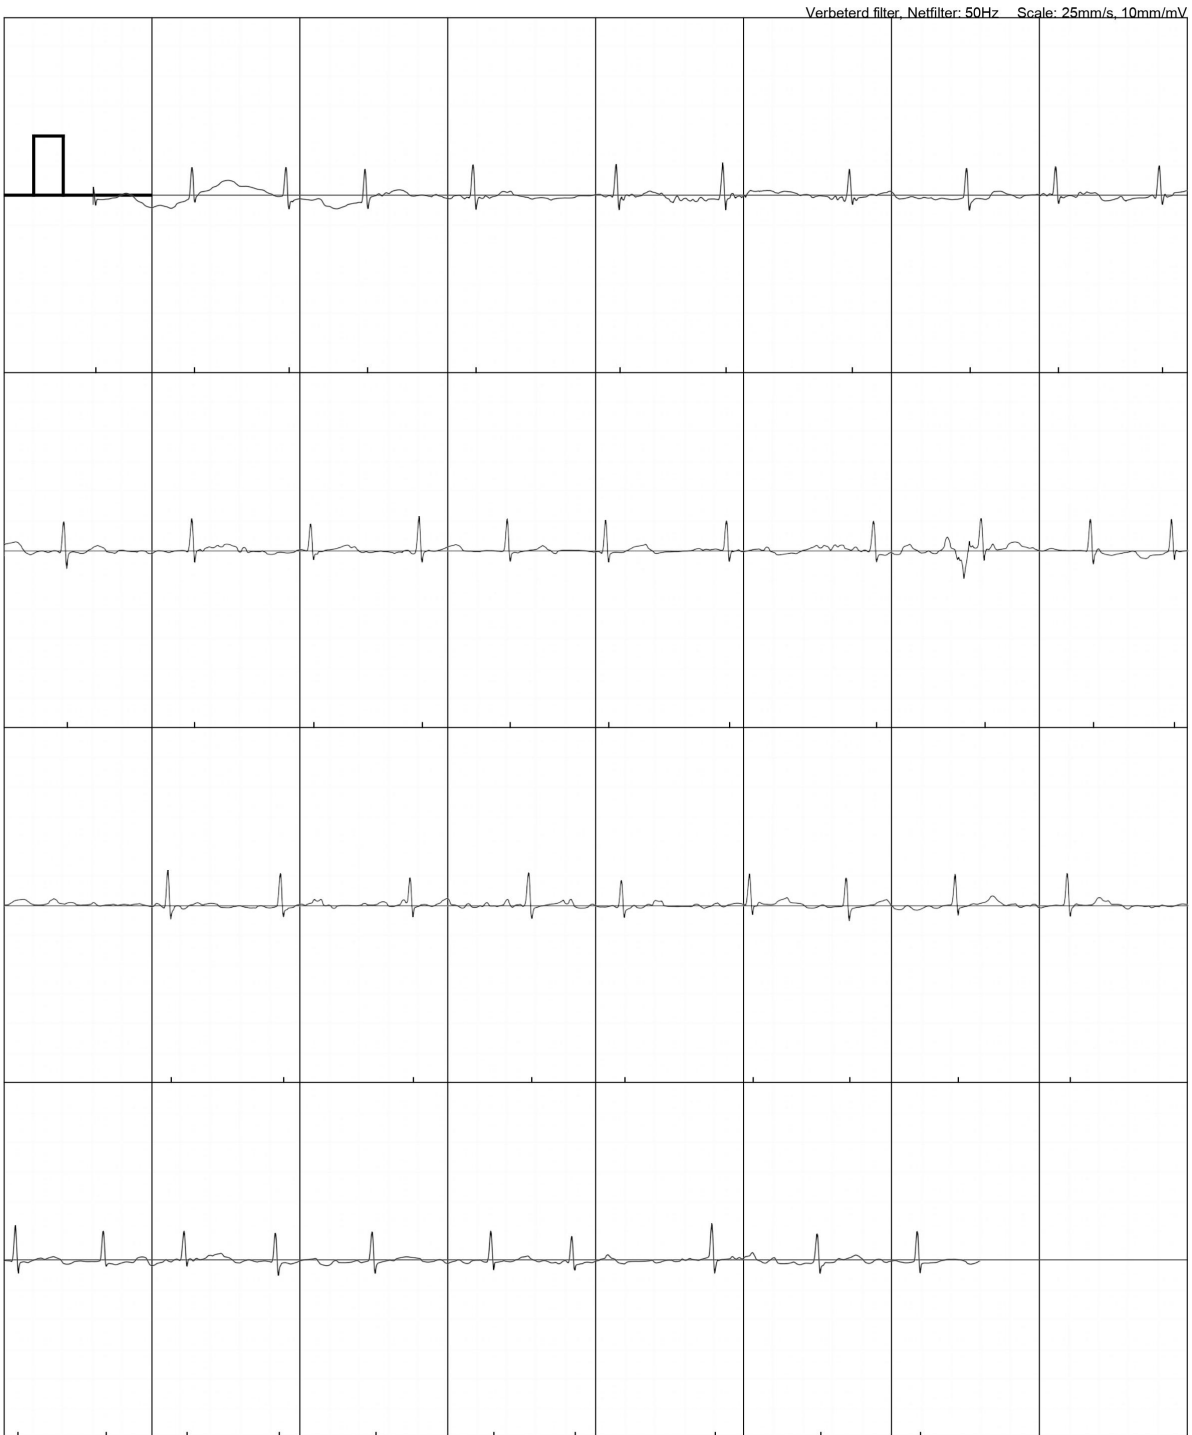



## INTERPRET-AF\_Single-lead\_ECG

\* 10. How would you classify the following measurement?

- ☐ Regular rhythm      ☐ One or more ectopic/missed heartbeats      ☐ Atrial flutter      ☐ Atrial fibrillation      ☐ Unreadable
- ☐ Other (please specify)

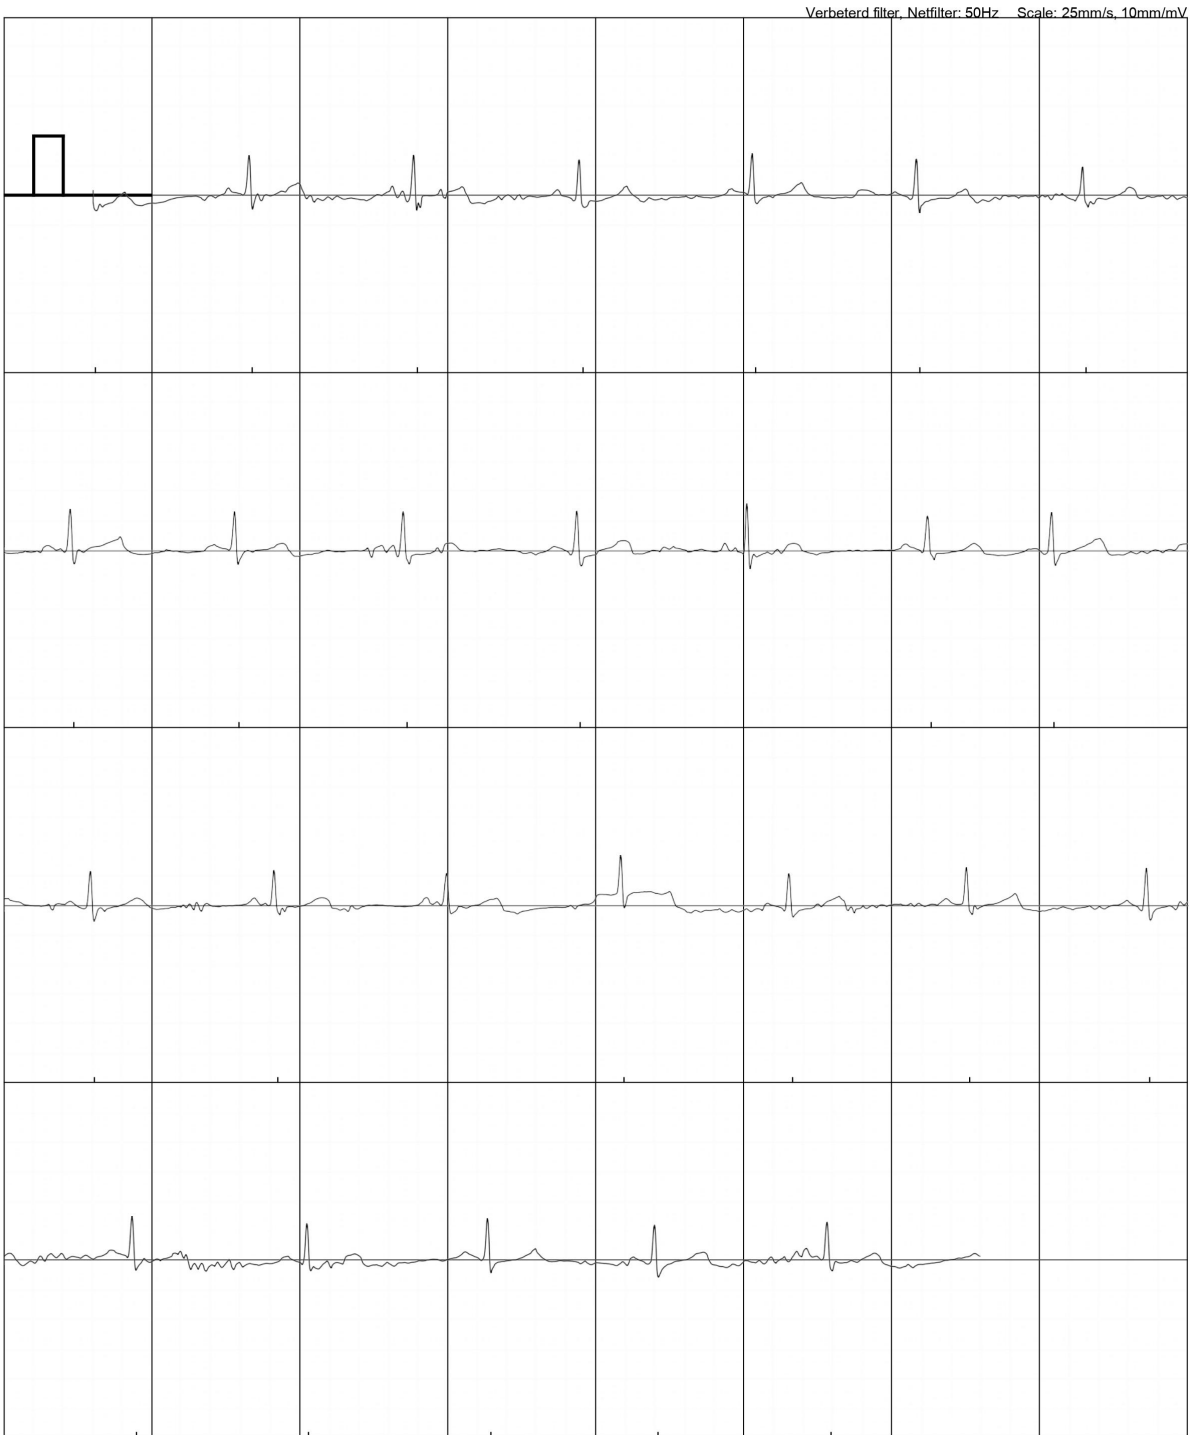



## INTERPRET-AF\_Single-lead\_ECG

\* 11. How would you classify the following measurement?

- ☐ Regular rhythm      ☐ One or more ectopic/missed heartbeats      ☐ Atrial flutter      ☐ Atrial fibrillation      ☐ Unreadable
- ☐ Other (please specify)



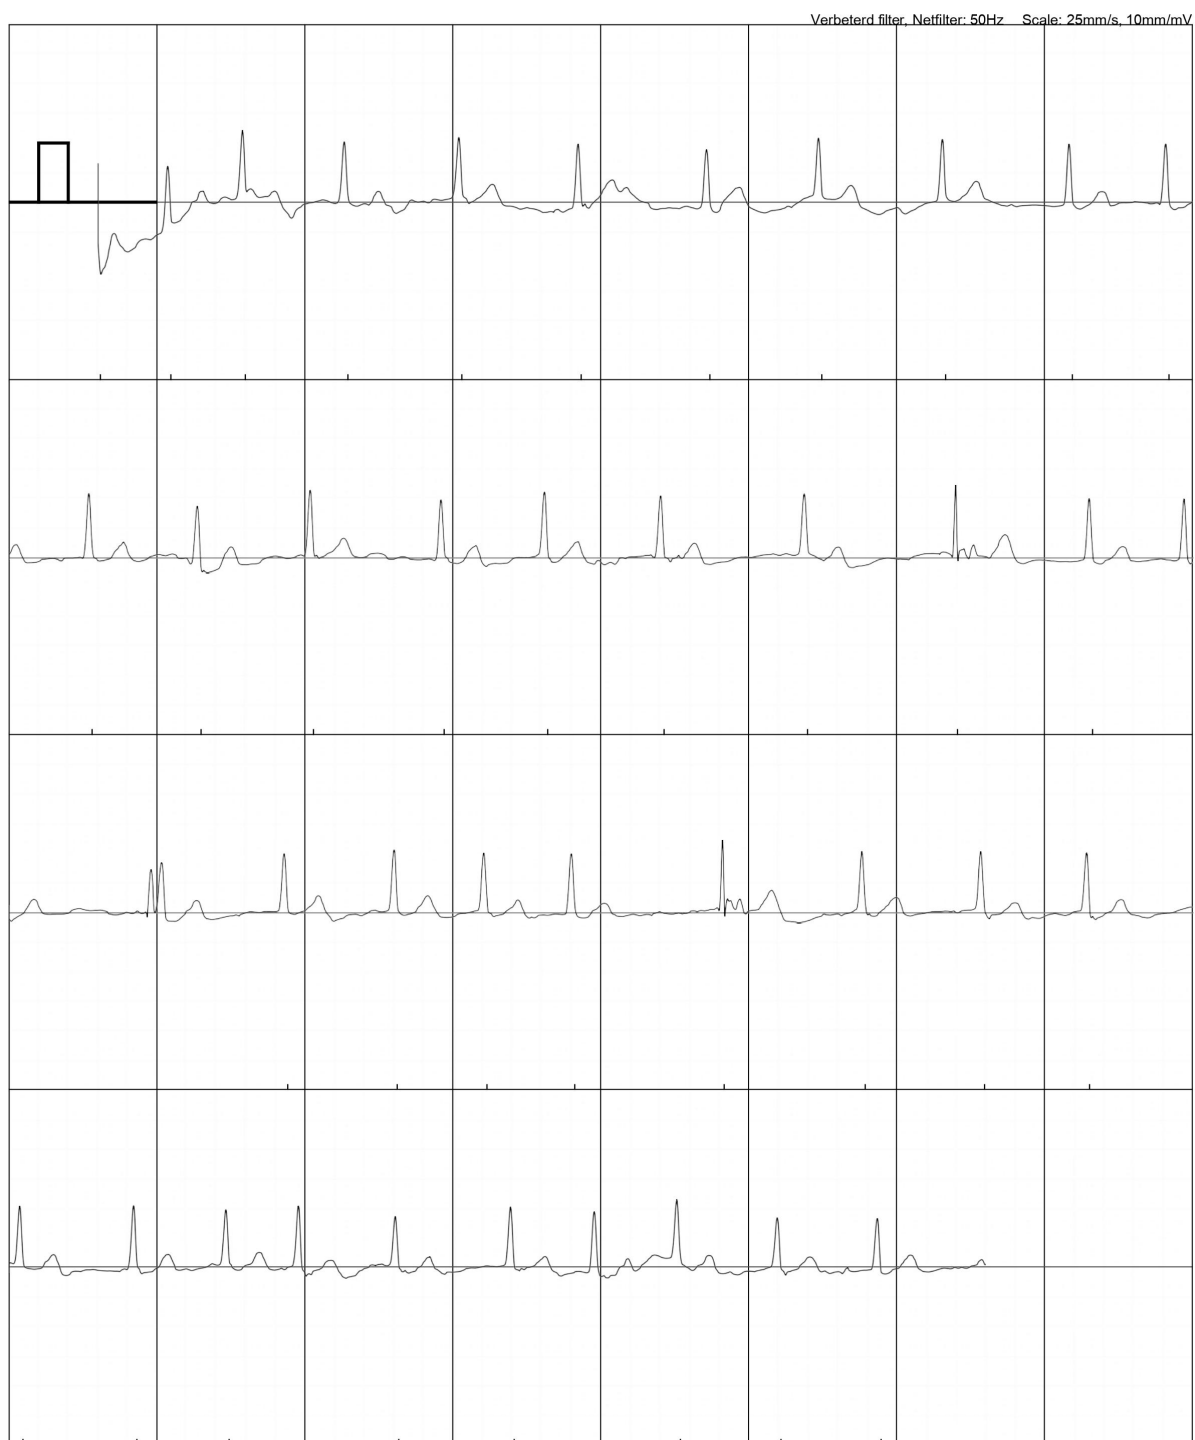



## INTERPRET-AF\_Single-lead\_ECG

\* 12. How would you classify the following measurement?

- ☐ Regular rhythm      ☐ One or more ectopic/missed heartbeats      ☐ Atrial flutter      ☐ Atrial fibrillation      ☐ Unreadable
- ☐ Other (please specify)

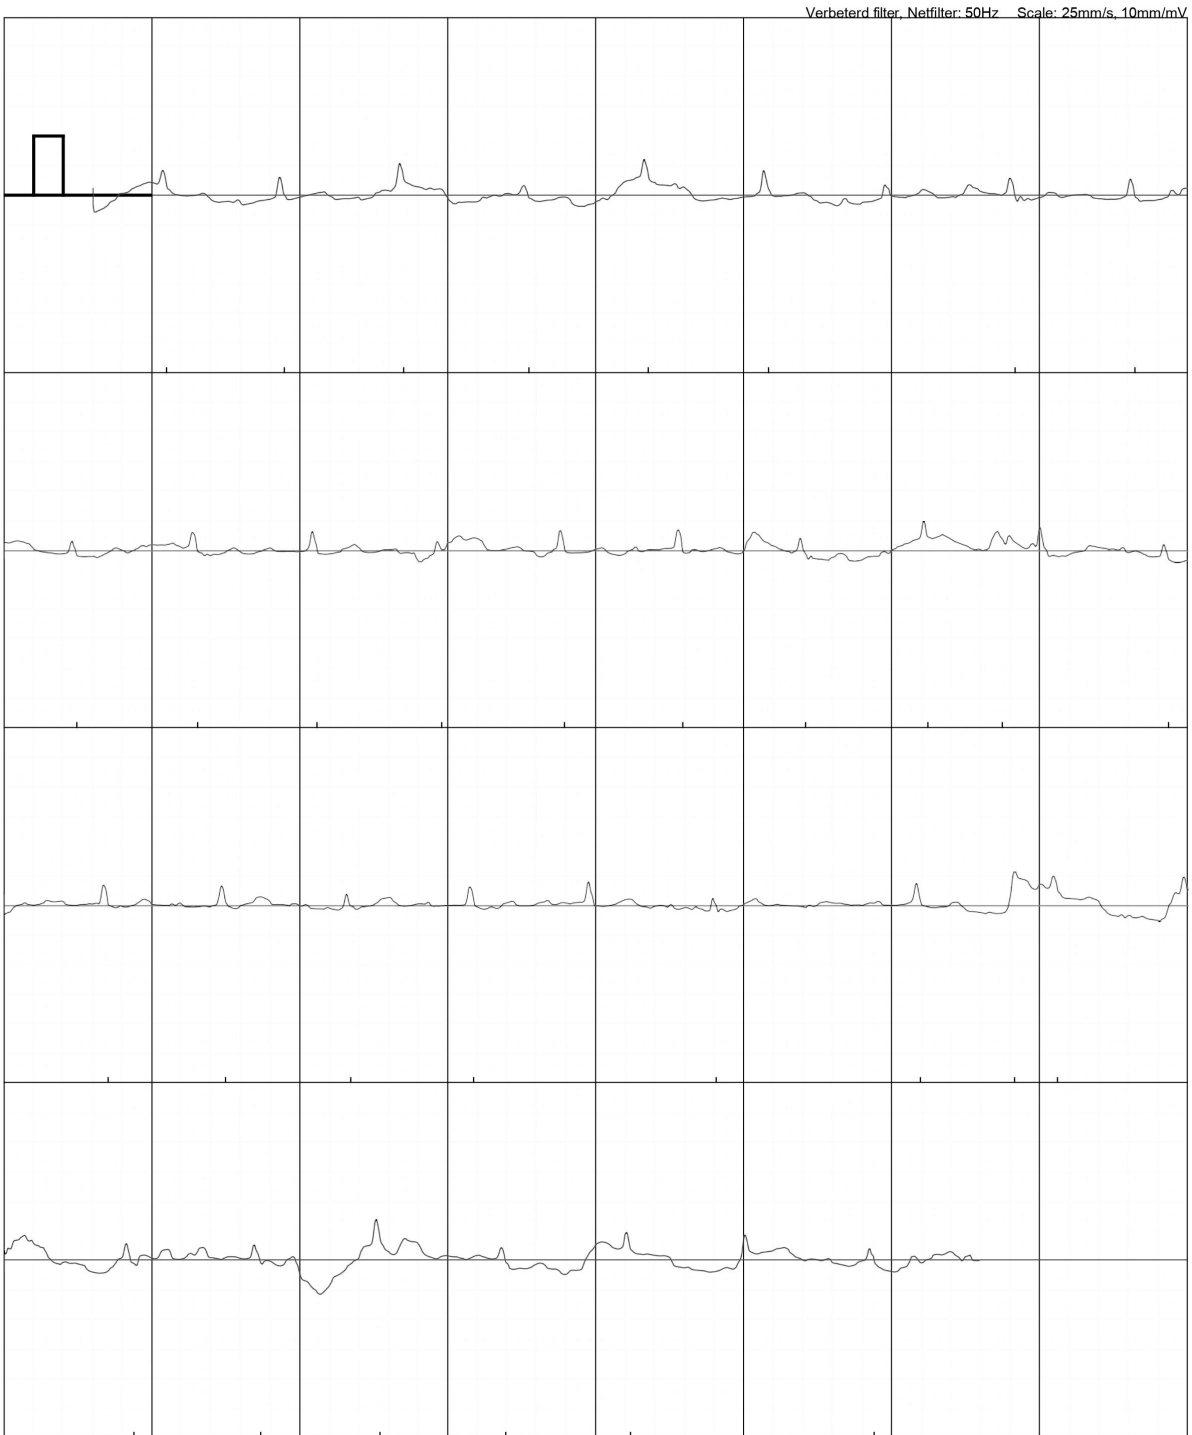



## INTERPRET-AF\_Single-lead\_ECG

\* 13. How would you classify the following measurement?

- ☐ Regular rhythm      ☐ One or more ectopic/missed heartbeats      ☐ Atrial flutter      ☐ Atrial fibrillation      ☐ Unreadable
- ☐ Other (please specify)

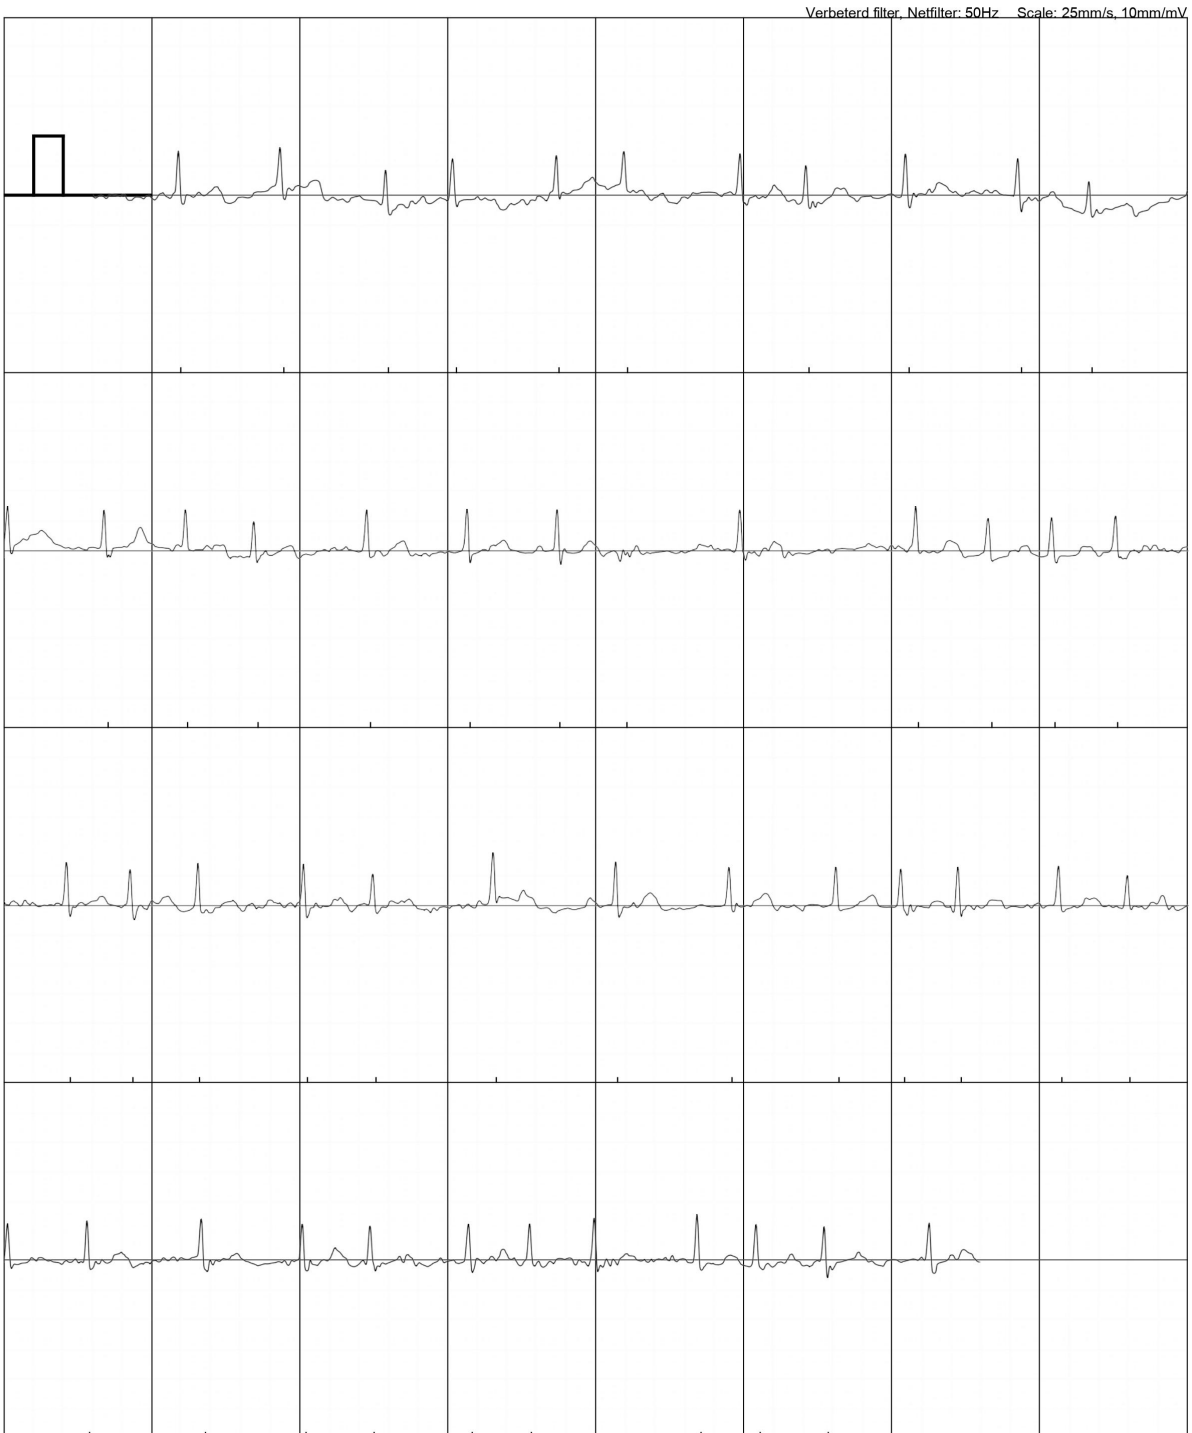





## INTERPRET-AF\_Single-lead\_ECG

\* 14. How would you classify the following measurement?

- ☐ Regular rhythm      ☐ One or more ectopic/missed heartbeats      ☐ Atrial flutter      ☐ Atrial fibrillation      ☐ Unreadable
- ☐ Other (please specify)

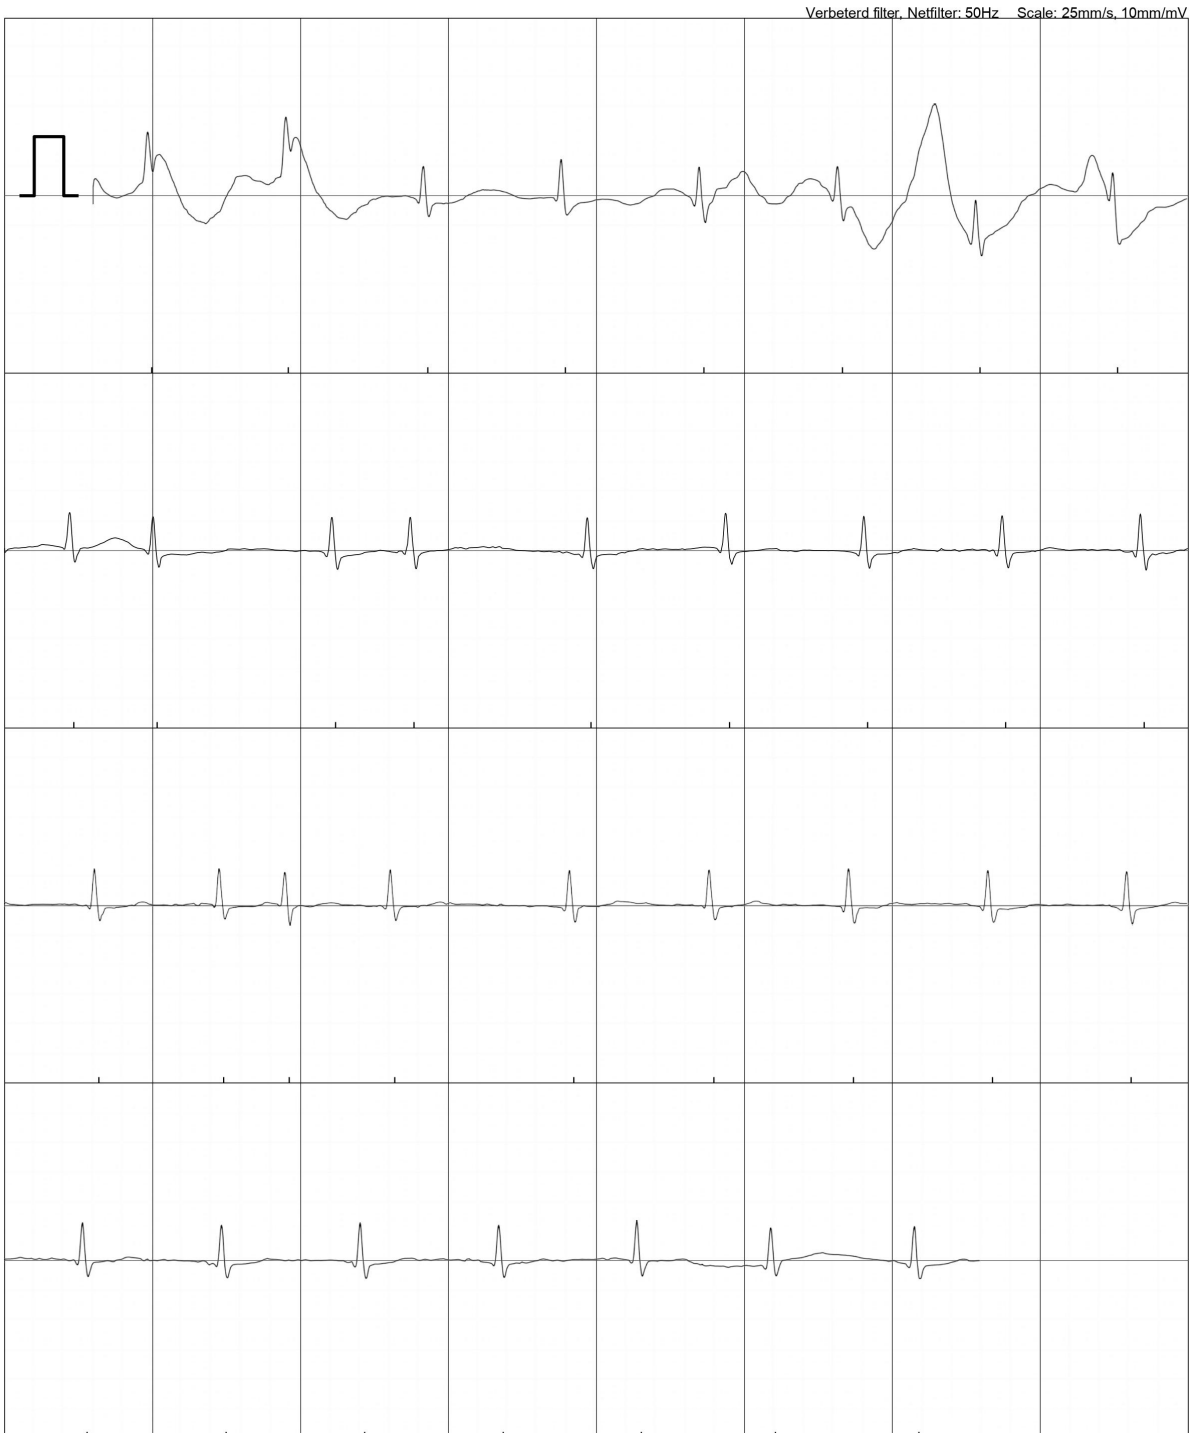

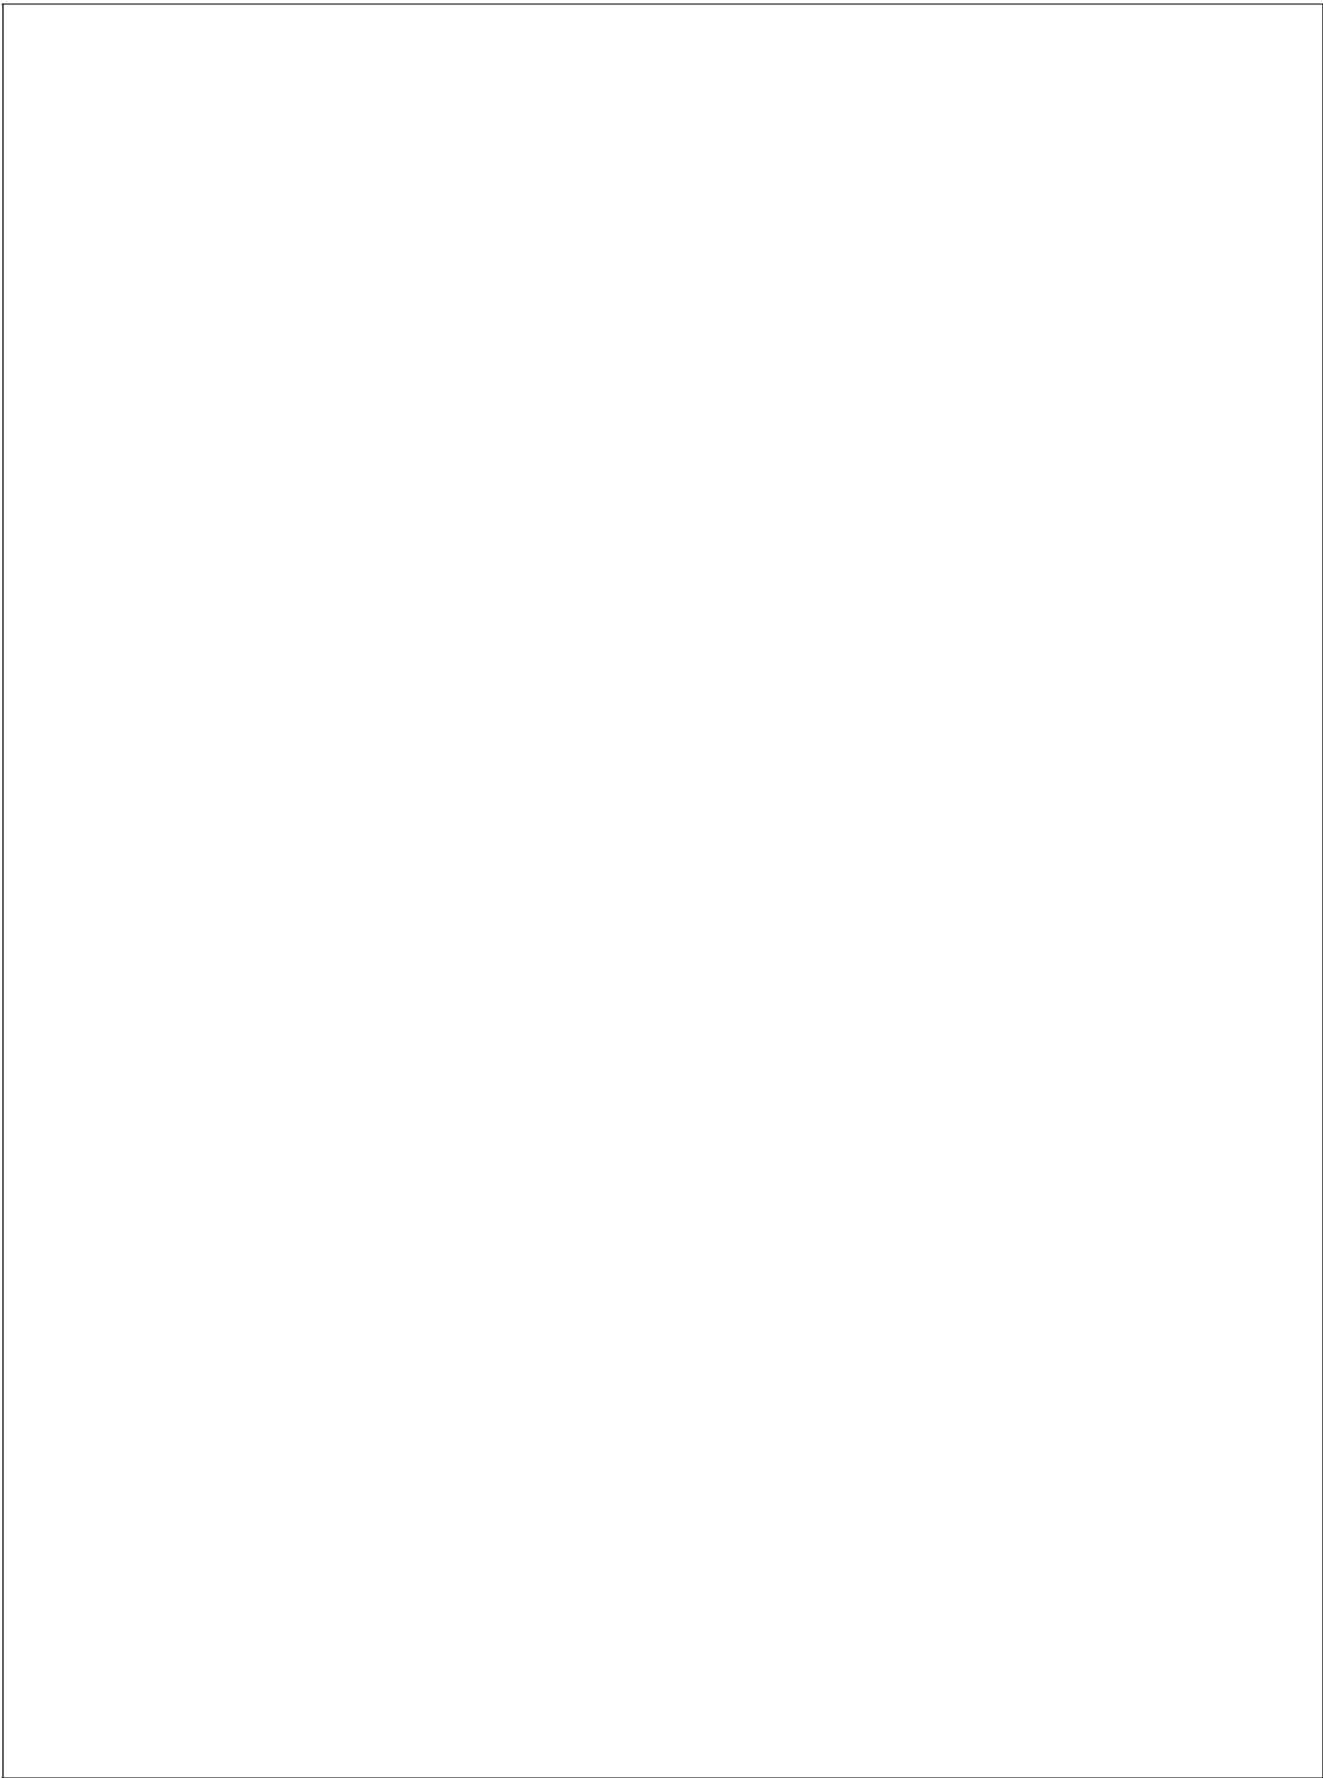

## INTERPRET-AF\_Single-lead\_ECG

\* 15. How would you classify the following measurement?

- ☐ Regular rhythm      ☐ One or more ectopic/missed heartbeats      ☐ Atrial flutter      ☐ Atrial fibrillation      ☐ Unreadable
- ☐ Other (please specify)

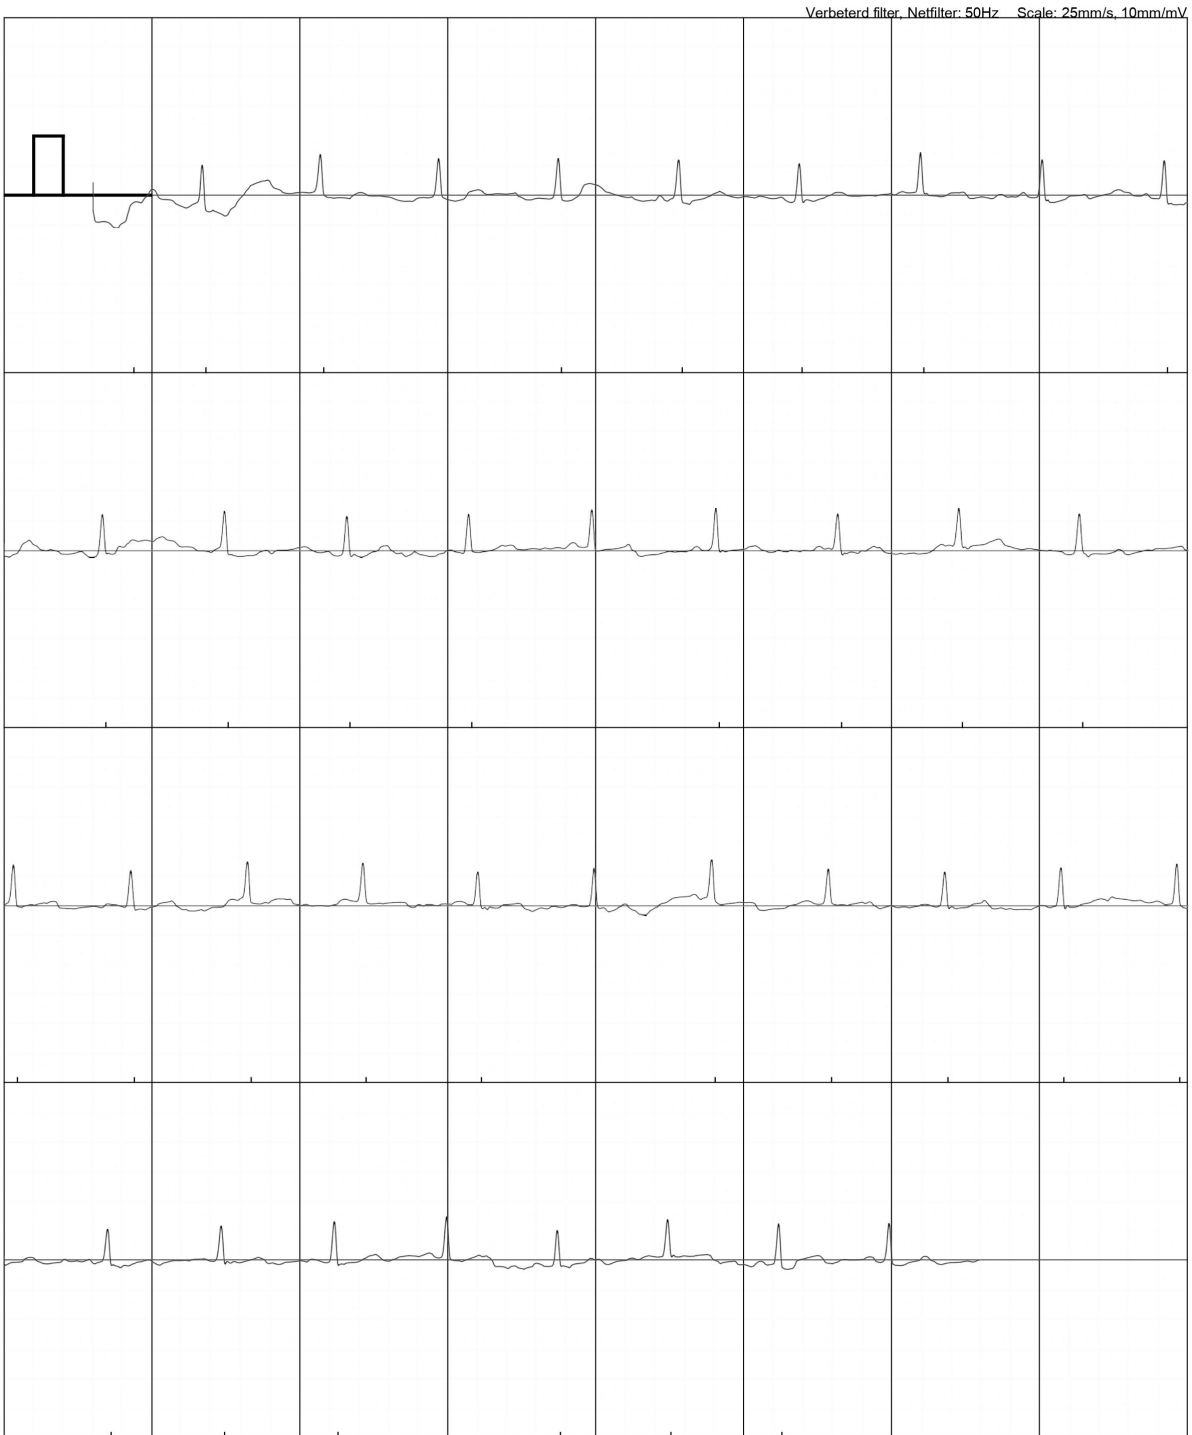



## INTERPRET-AF\_Single-lead\_ECG

\* 16. How would you classify the following measurement?

- ☐ Regular rhythm      ☐ One or more ectopic/missed heartbeats      ☐ Atrial flutter      ☐ Atrial fibrillation      ☐ Unreadable
- ☐ Other (please specify)

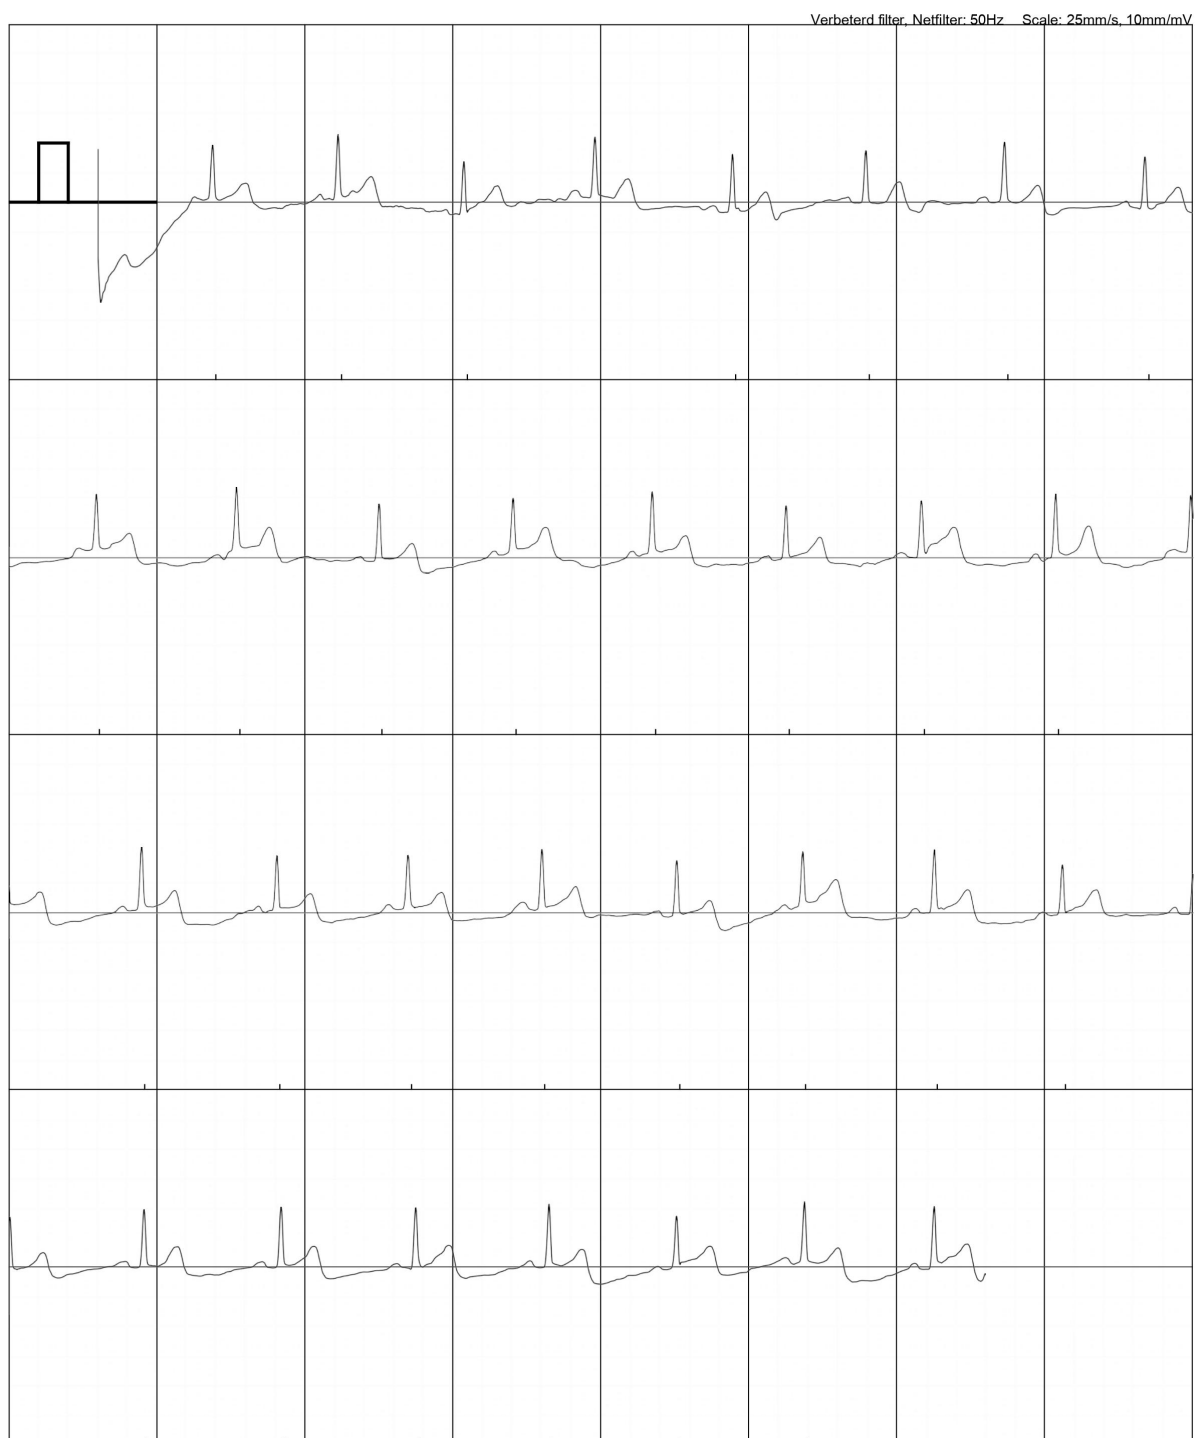





## INTERPRET-AF\_Single-lead\_ECG

\* 17. How would you classify the following measurement?

- ☐ Regular rhythm      ☐ One or more ectopic/missed heartbeats      ☐ Atrial flutter      ☐ Atrial fibrillation      ☐ Unreadable
- ☐ Other (please specify)

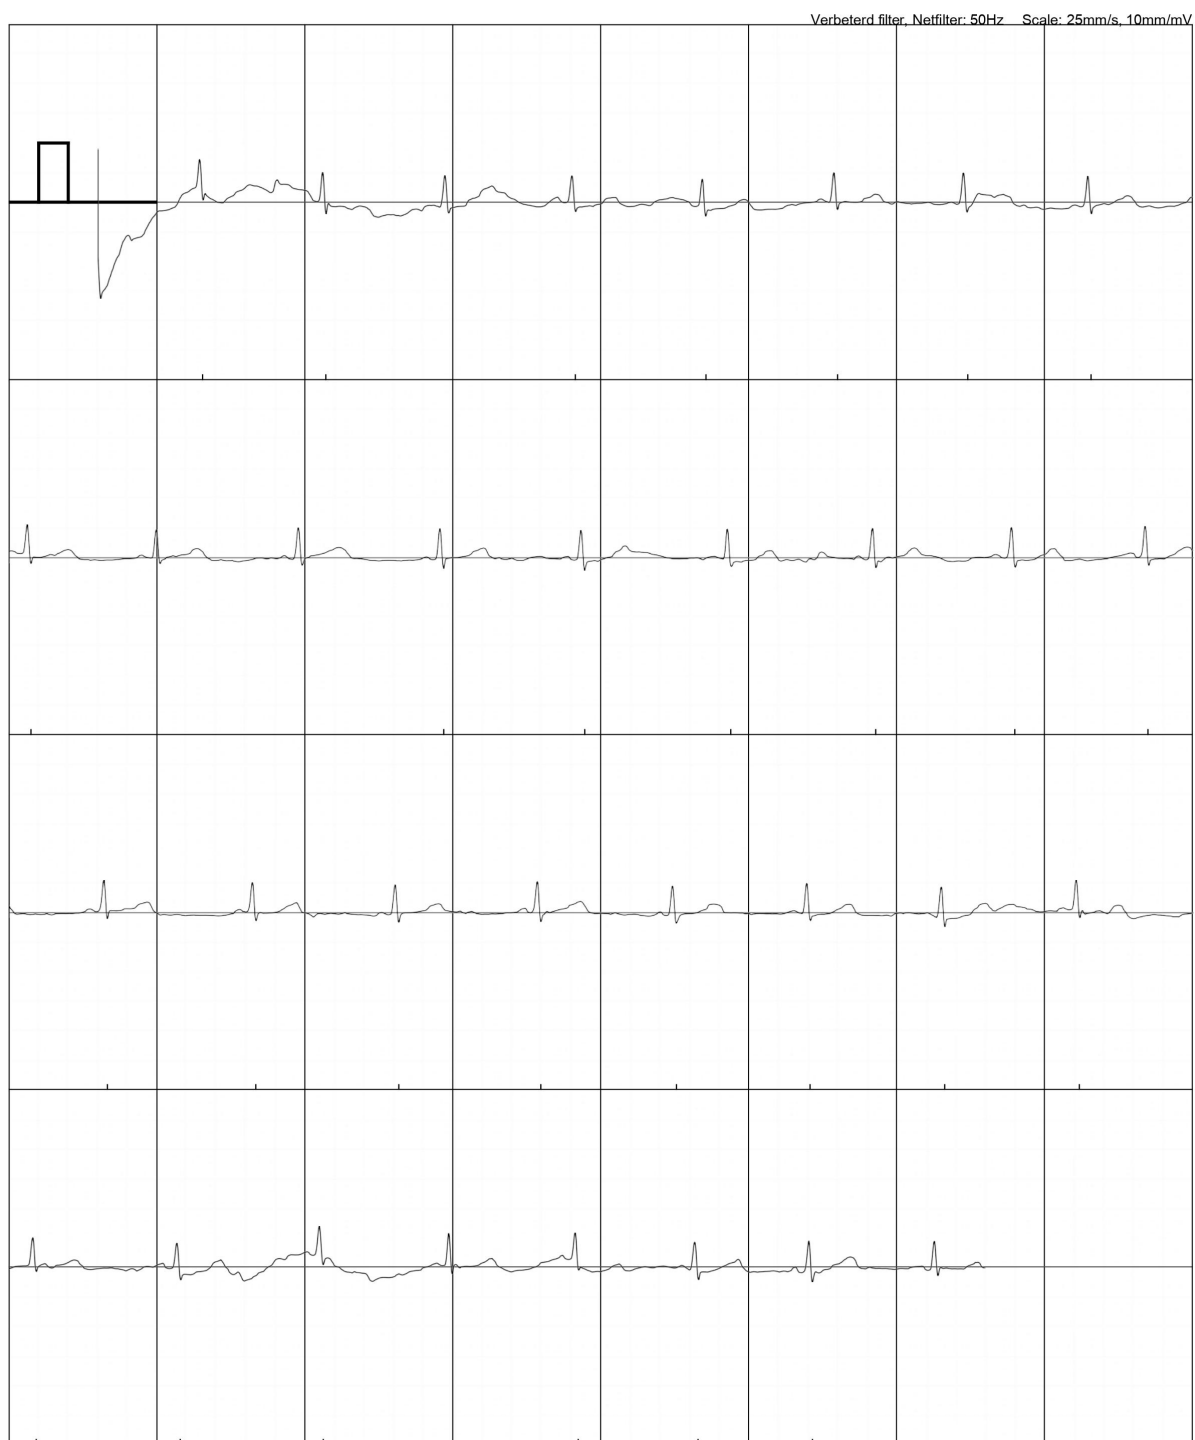



## INTERPRET-AF\_Single-lead\_ECG

\* 18. How would you classify the following measurement?

- ☐ Regular rhythm      ☐ One or more ectpic/missed heartbeats      ☐ Atrial flutter      ☐ Atrial fibrillation      ☐ Unreadable
- ☐ Other (please specify)

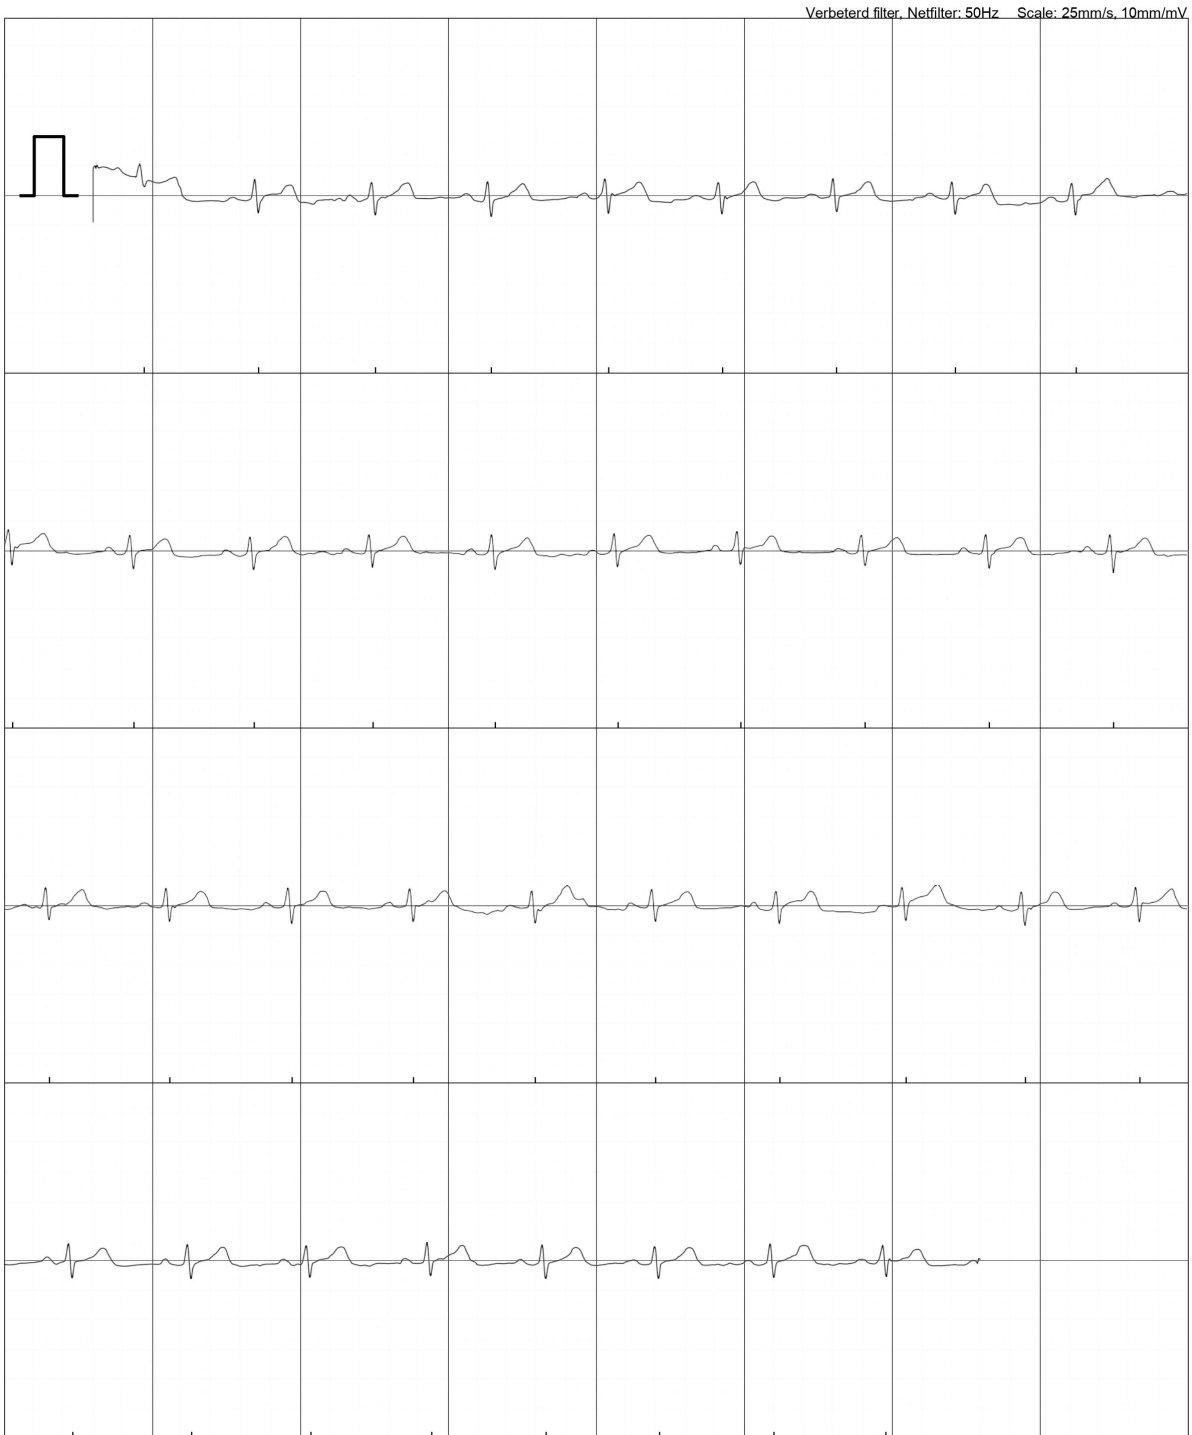



## INTERPRET-AF\_Single-lead\_ECG

\* 19. How would you classify the following measurement?

- ☐ Regular rhythm      ☐ One or more ectopic/missed heartbeats      ☐ Atrial flutter      ☐ Atrial fibrillation      ☐ Unreadable
- ☐ Other (please specify)



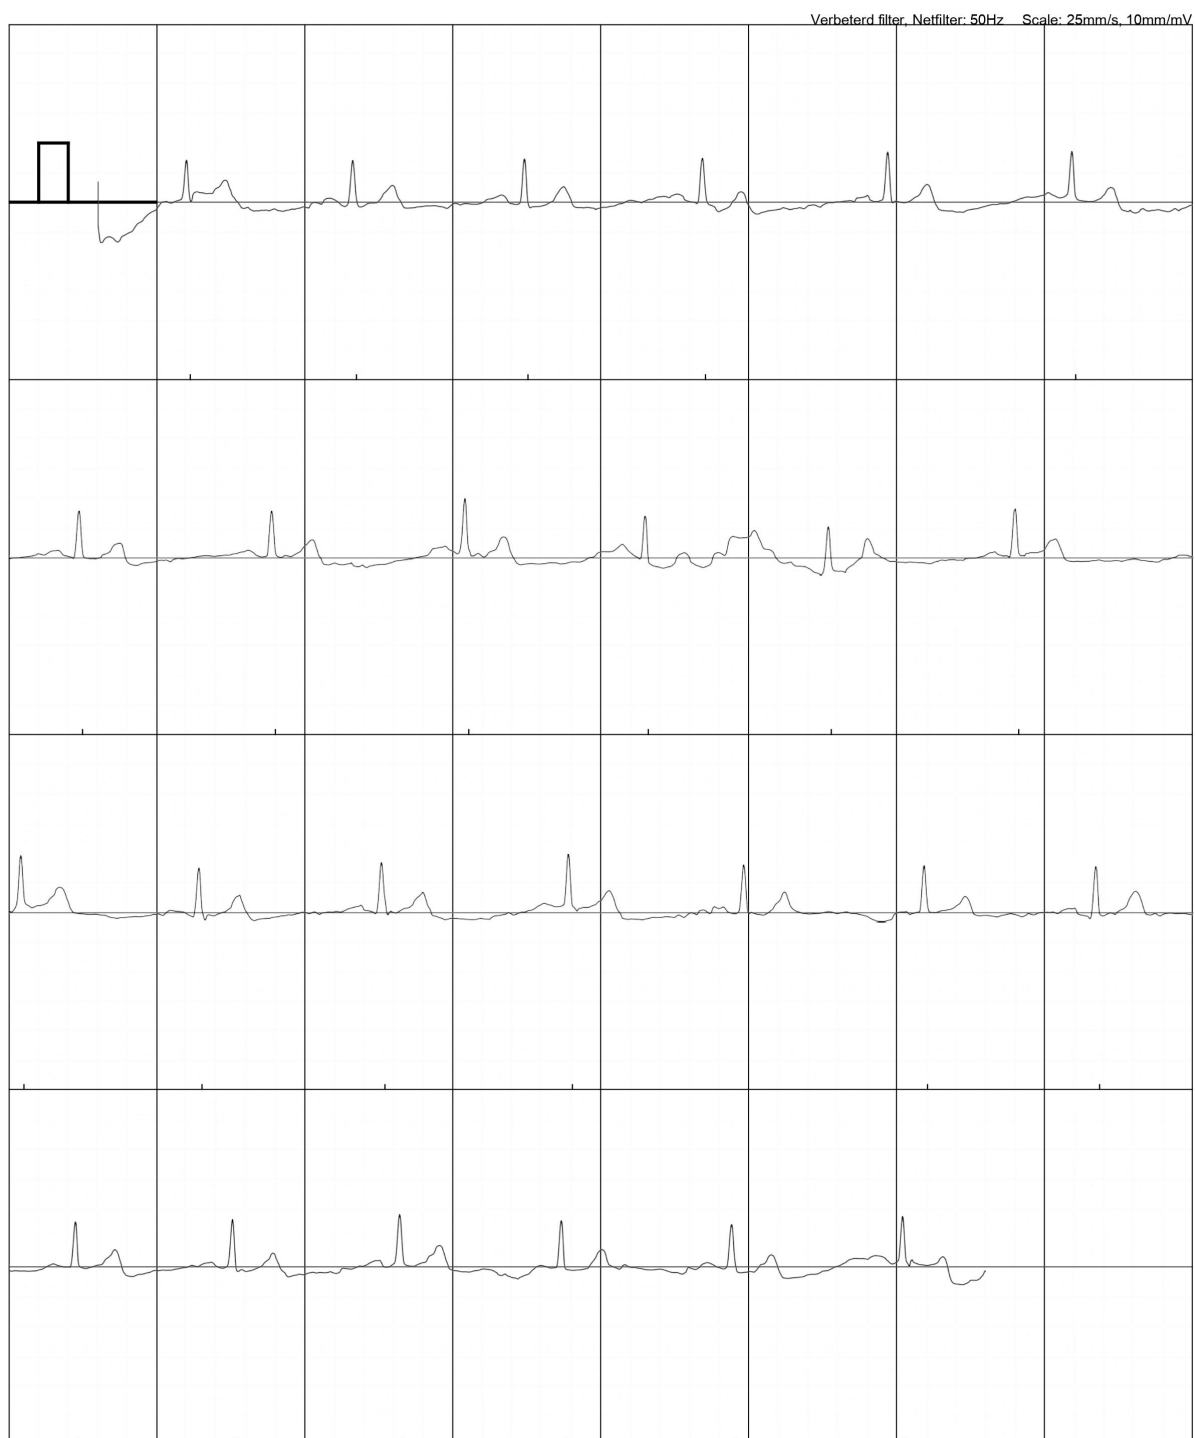



## INTERPRET-AF\_Single-lead\_ECG

\* 20. How would you classify the following measurement?

- ☐ Regular rhythm
- ☐ One or more ectopic/missed heartbeats
- ☐ Atrial flutter
- ☐ Atrial fibrillation
- ☐ Unreadable
- ☐ Other (please specify)

Verbeterd filter, Netfilter: 50Hz Scale: 25mm/s, 10mm/mV

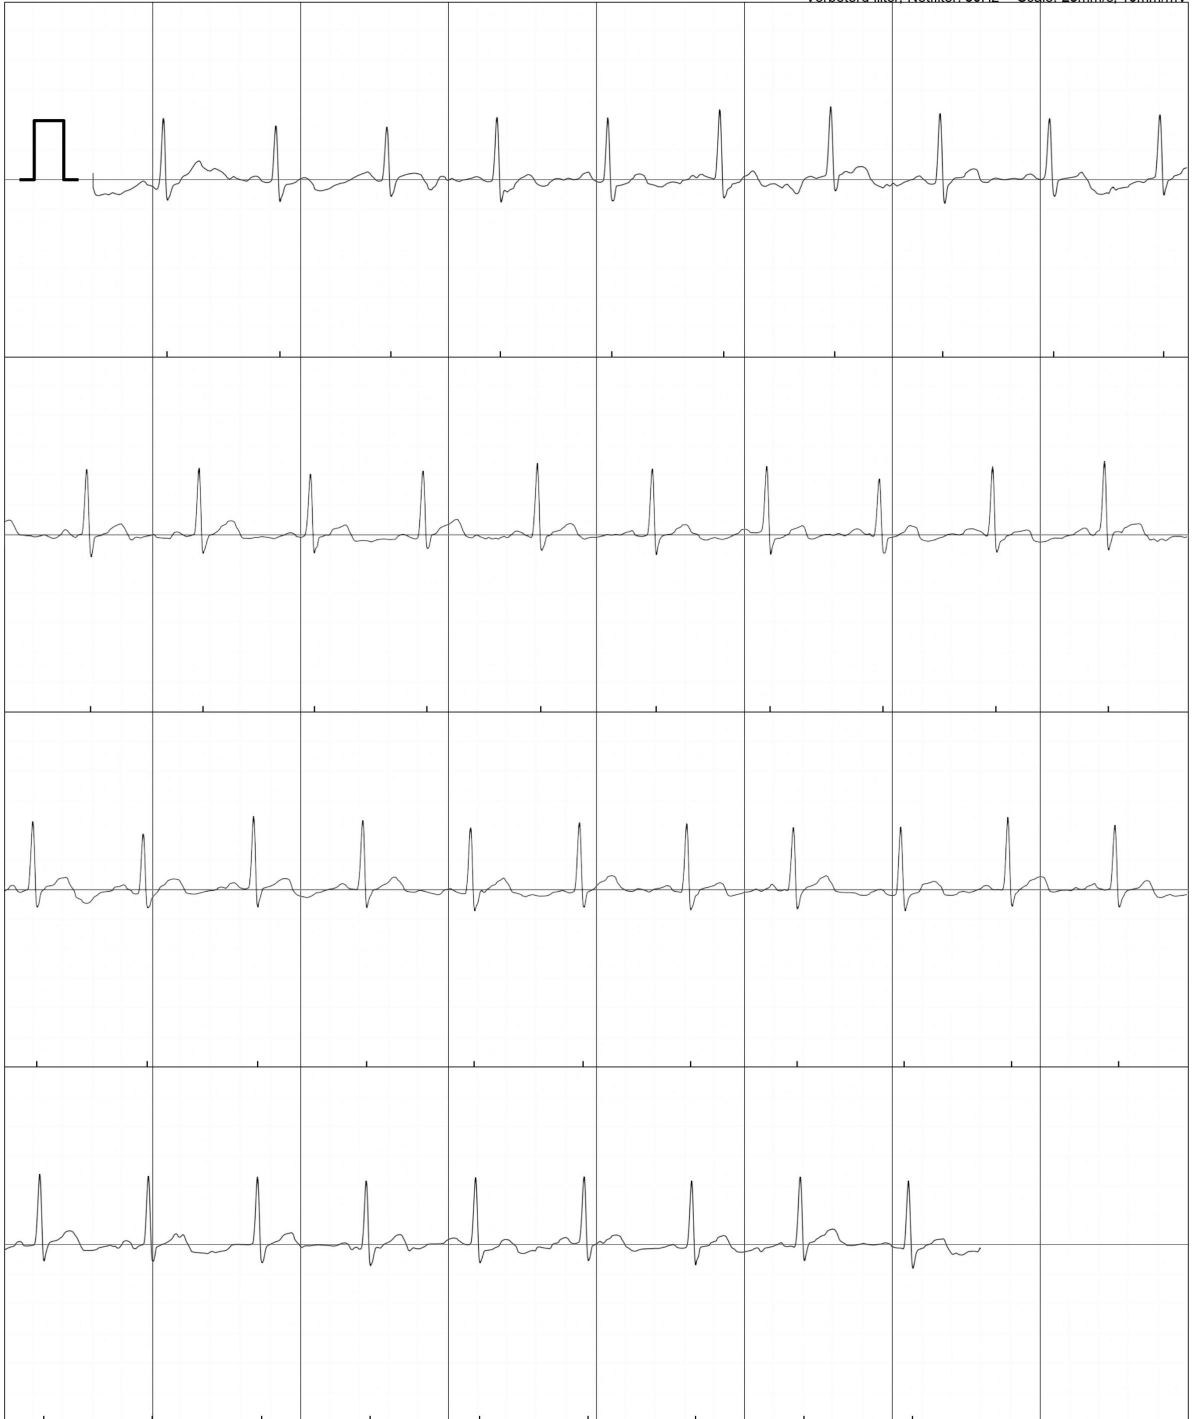



## INTERPRET-AF\_Single-lead\_ECG

\* 21. How would you classify the following measurement?

- ☐ Regular rhythm      ☐ One or more ectopic/missed heartbeats      ☐ Atrial flutter      ☐ Atrial fibrillation      ☐ Unreadable
- ☐ Other (please specify)

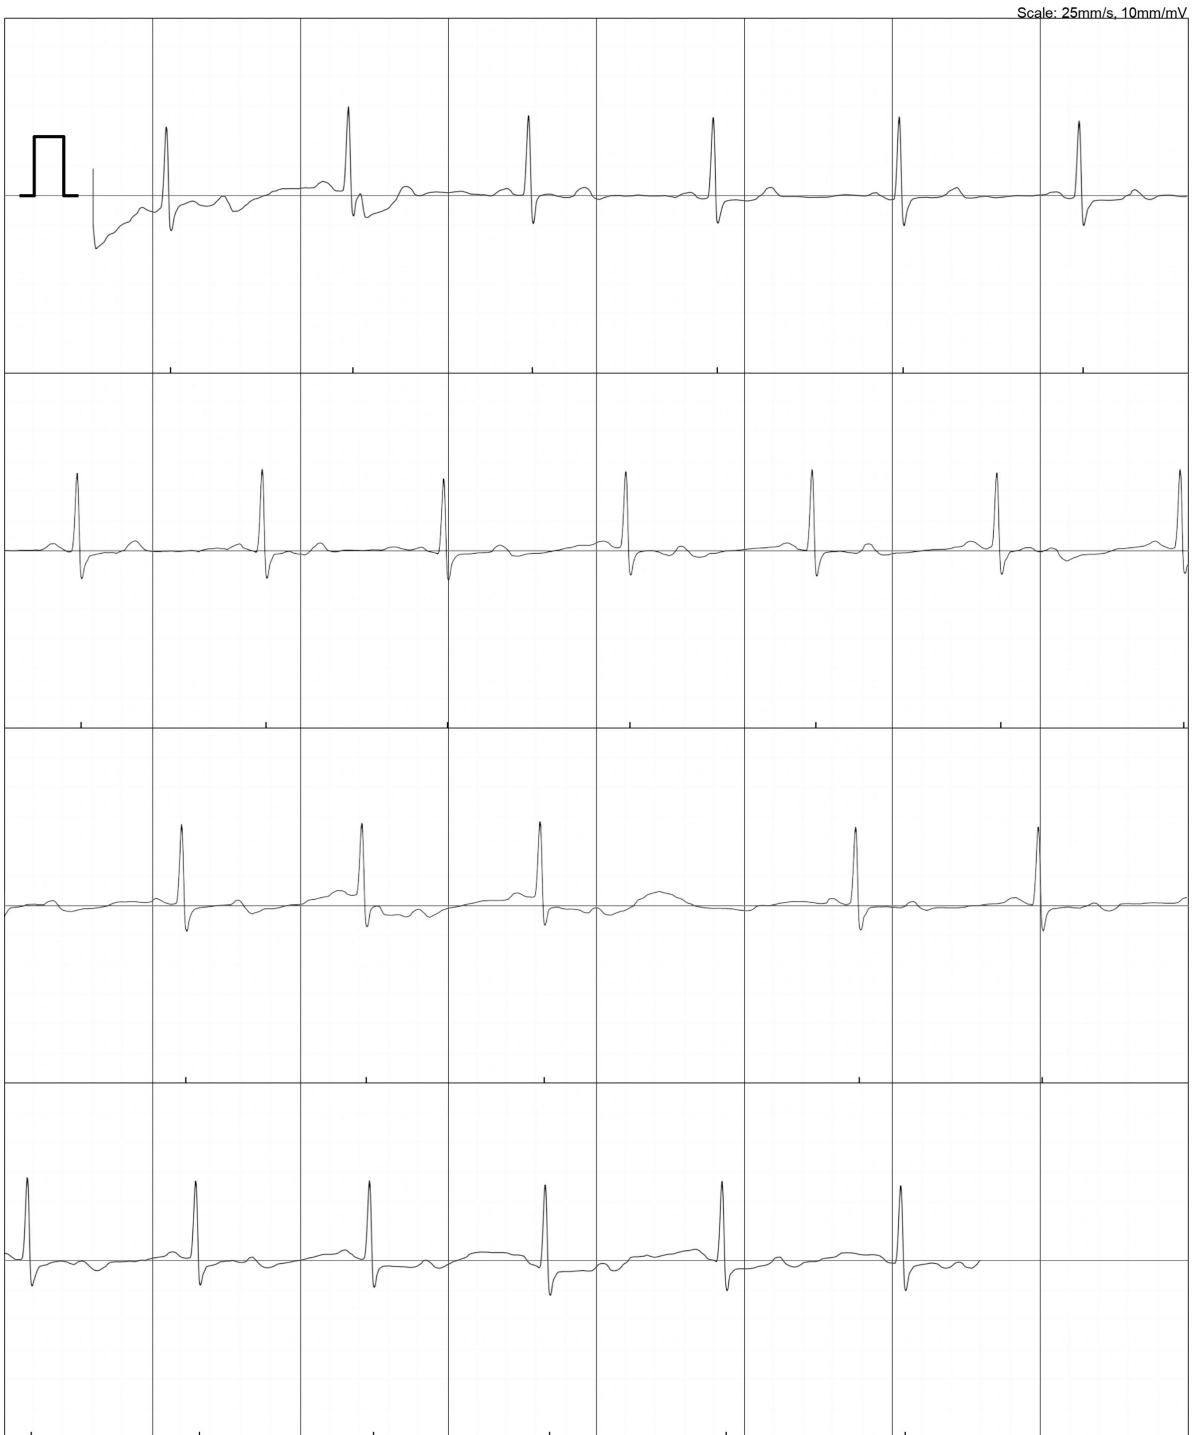





## INTERPRET-AF\_Single-lead\_ECG

\* 22. How would you classify the following measurement?

- ☐ Regular rhythm
- ☐ One or more ectopic/missed heartbeats
- ☐ Atrial flutter
- ☐ Atrial fibrillation
- ☐ Unreadable
- ☐ Other (please specify)

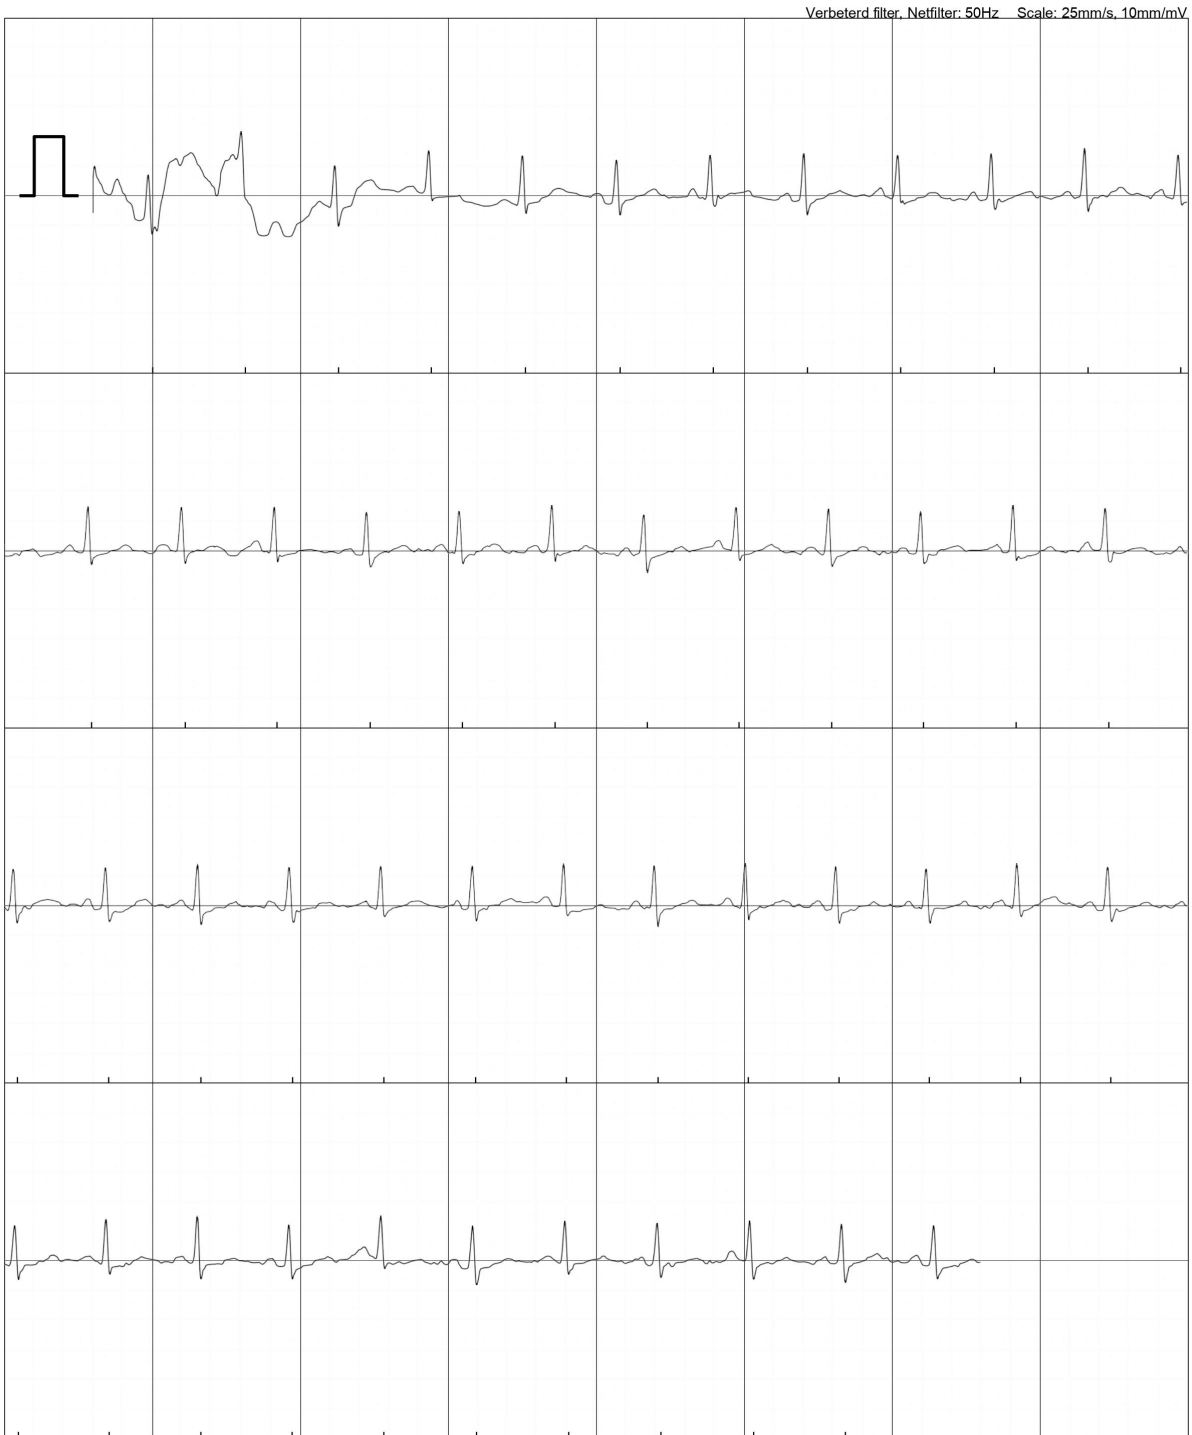



## INTERPRET-AF\_Single-lead\_ECG

\* 23. How would you classify the following measurement?

- ☐ Regular rhythm
- ☐ One or more ectopic/missed heartbeats
- ☐ Atrial flutter
- ☐ Atrial fibrillation
- ☐ Unreadable
- ☐ Other (please specify)

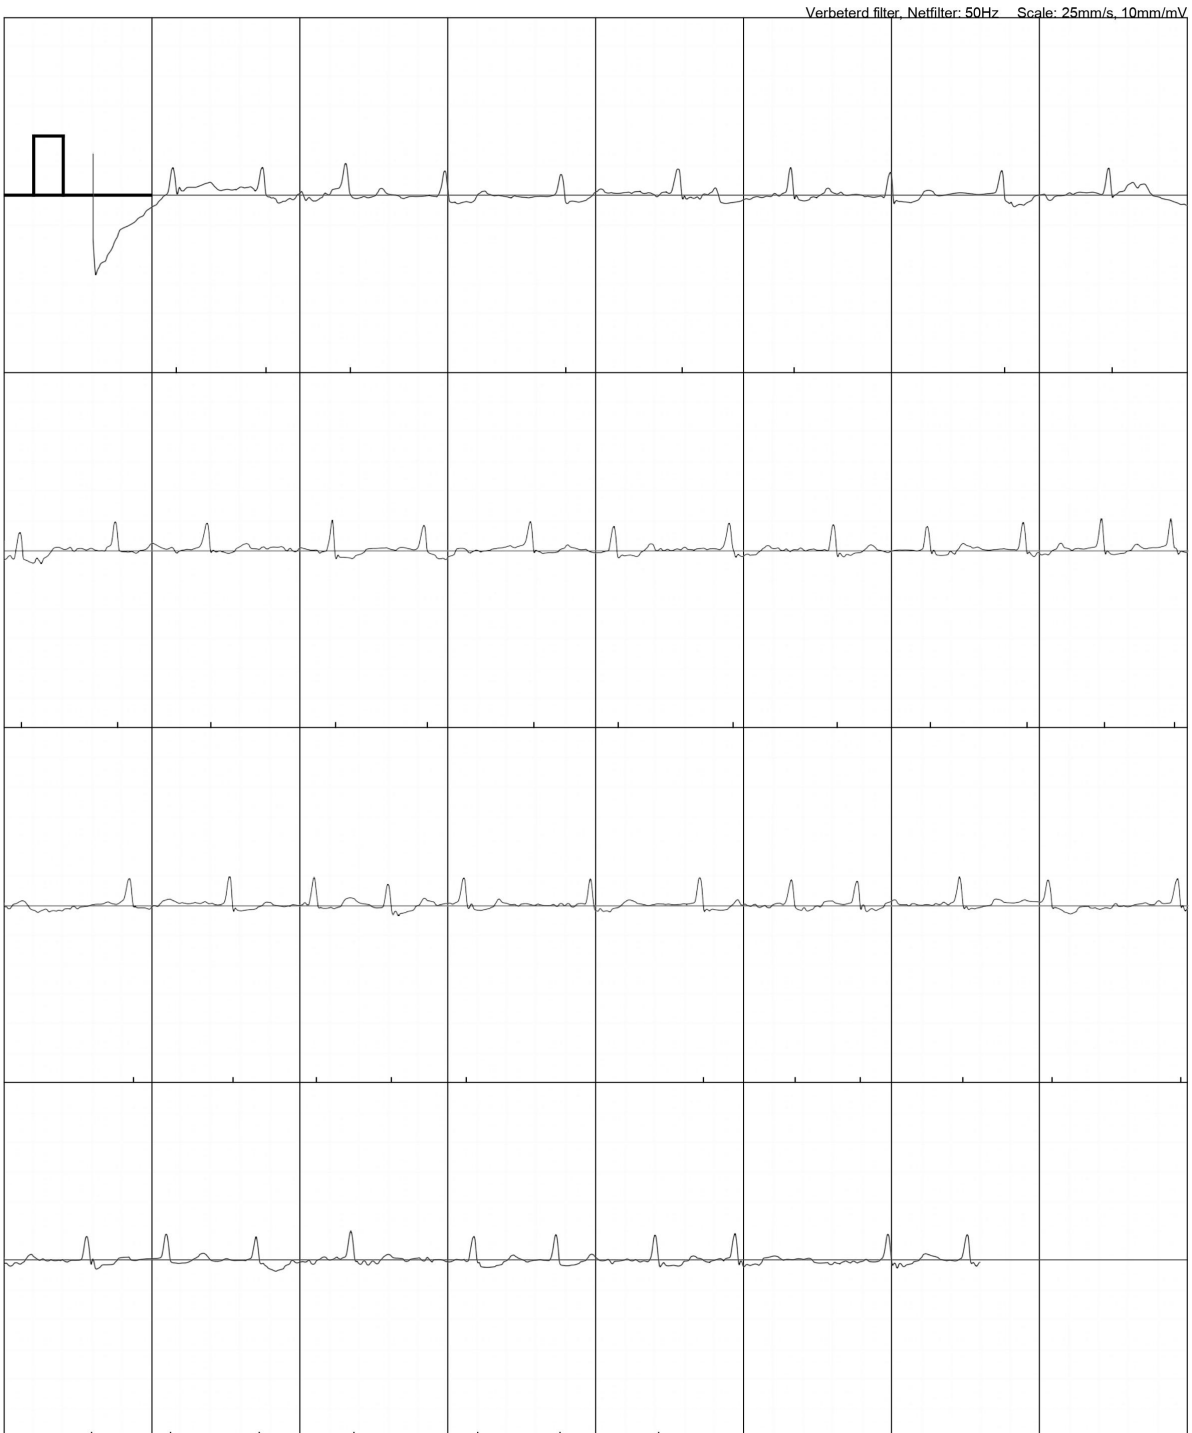



## INTERPRET-AF\_Single-lead\_ECG

\* 24. How would you classify the following measurement?

- ☐ Regular rhythm
- ☐ One or more ectopic/missed heartbeats
- ☐ Atrial flutter
- ☐ Atrial fibrillation
- ☐ Unreadable
- ☐ Other (please specify)

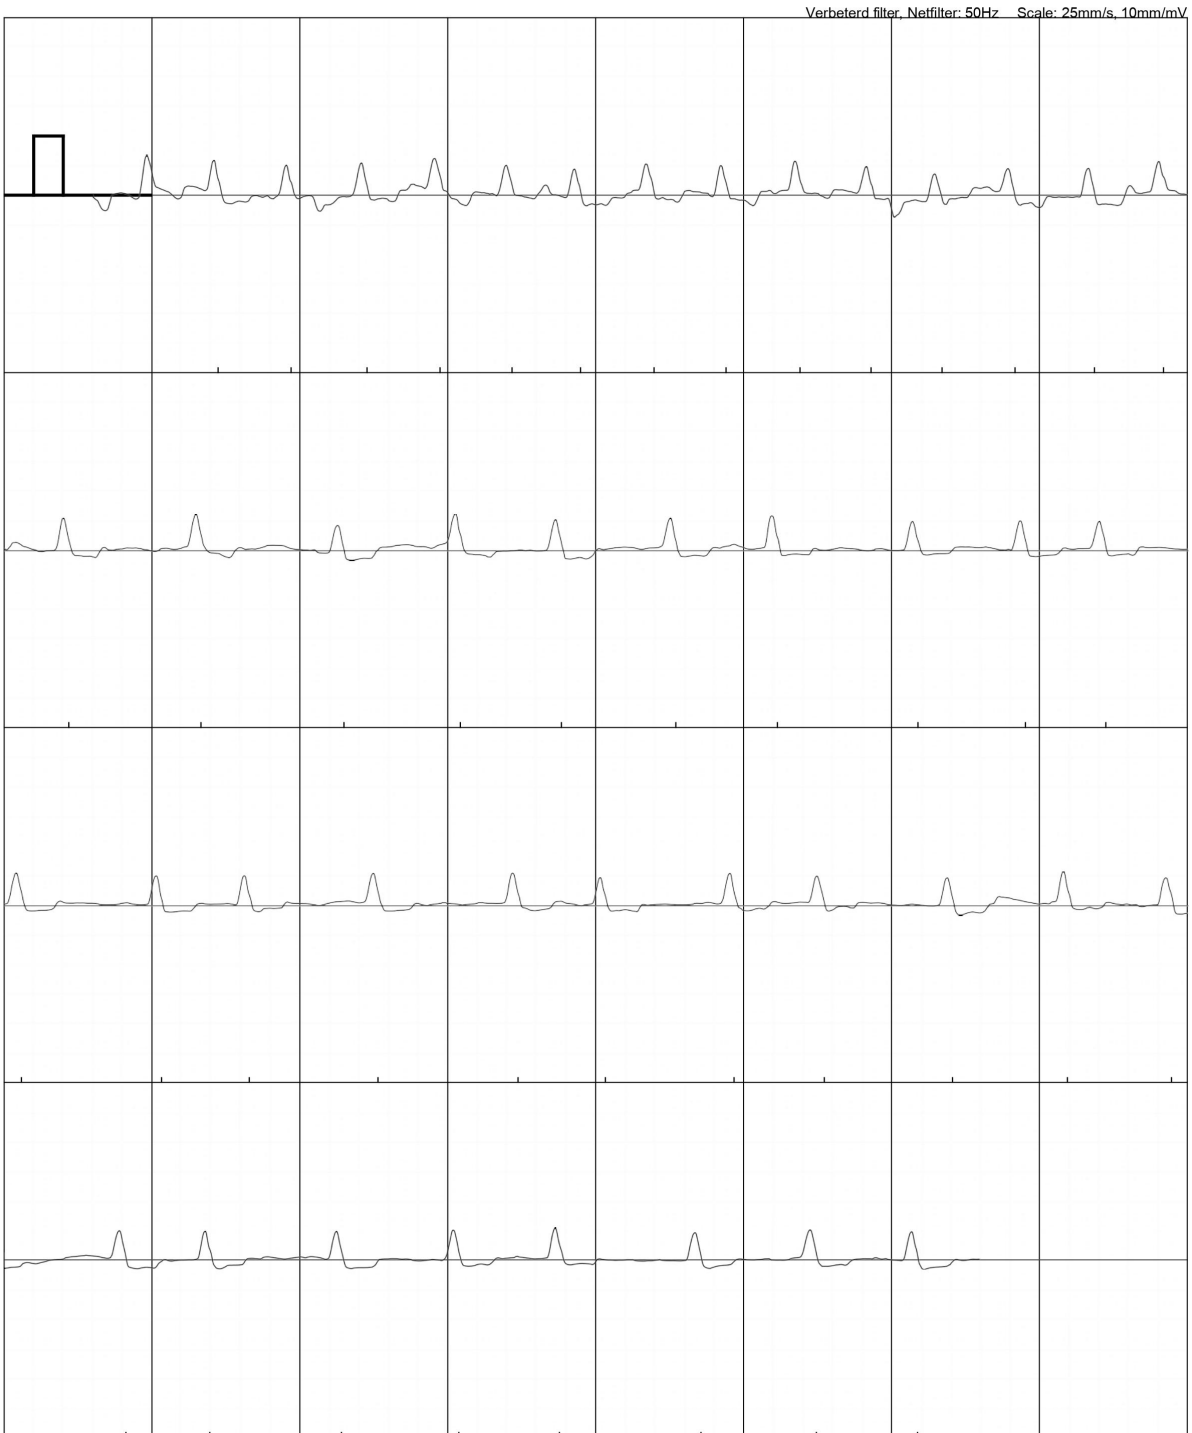





## INTERPRET-AF\_Single-lead\_ECG

\* 25. How would you classify the following measurement?

- ☐ Regular rhythm      ☐ One or more ectopic/missed heartbeats      ☐ Atrial flutter      ☐ Atrial fibrillation      ☐ Unreadable
- ☐ Other (please specify)

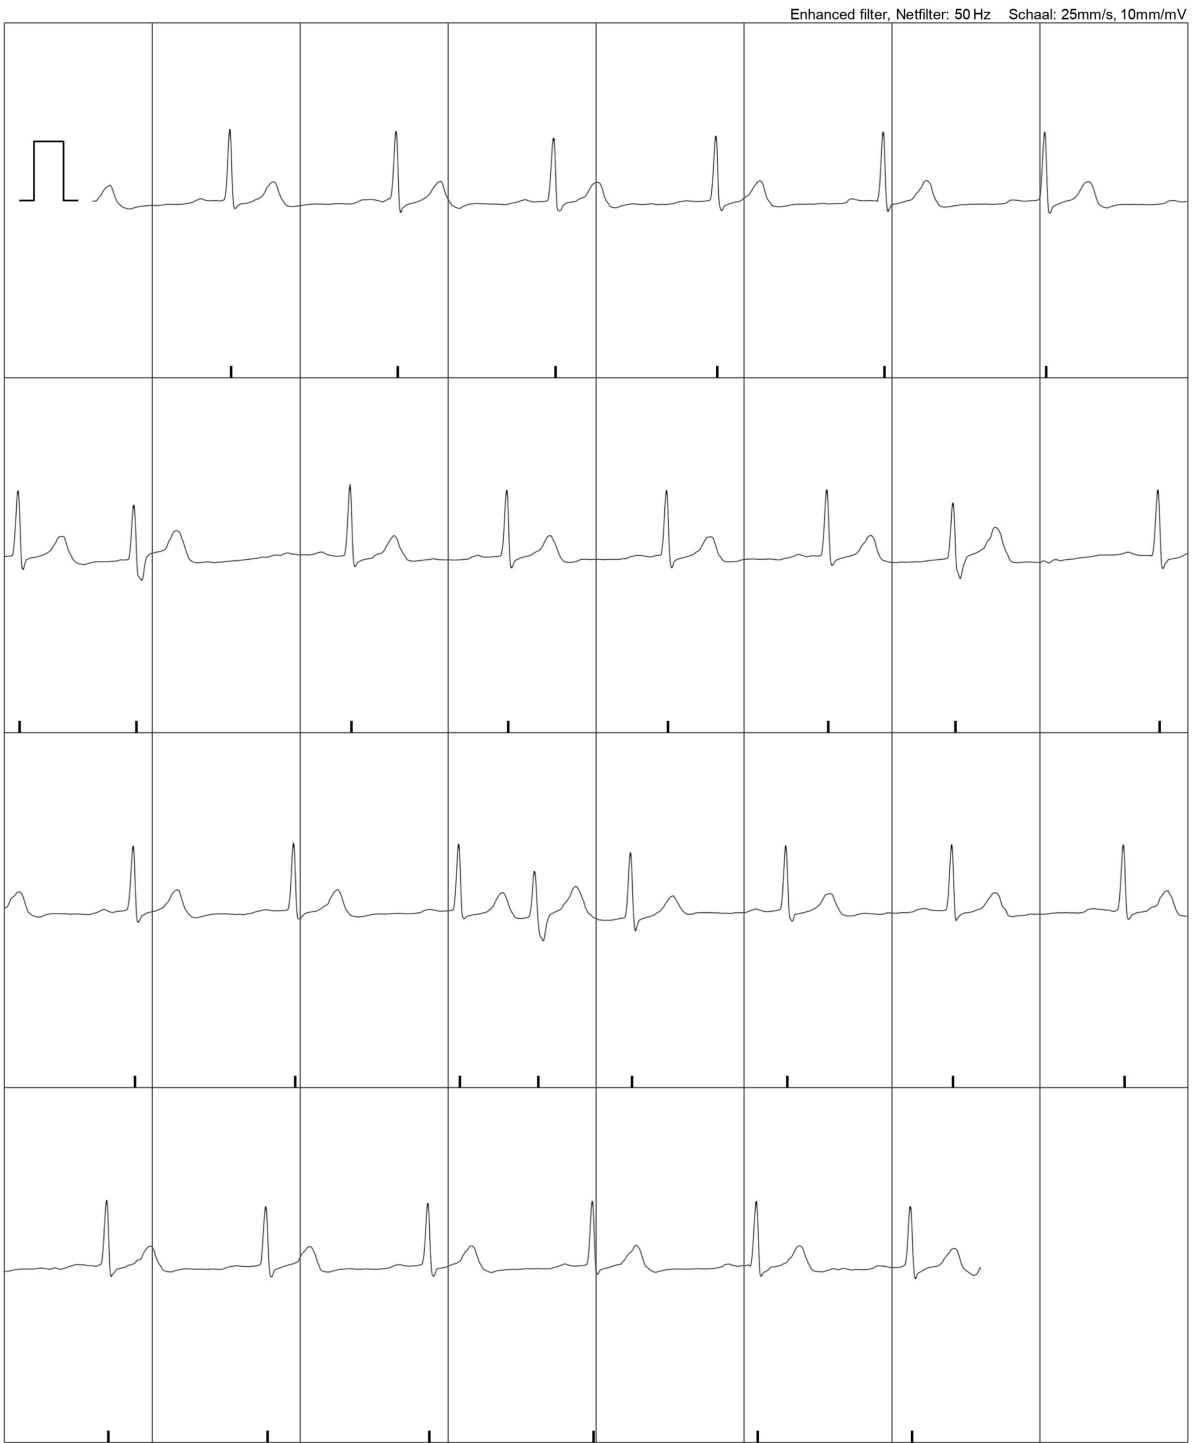



## INTERPRET-AF\_Single-lead\_ECG

\* 26. How would you classify the following measurement?

- ☐ Regular rhythm      ☐ One or more ectopic/missed heartbeats      ☐ Atrial flutter      ☐ Atrial fibrillation      ☐ Unreadable
- ☐ Other (please specify)

Enhanced filter, Netfilter: 50 Hz    Schaal: 25mm/s, 10mm/mV

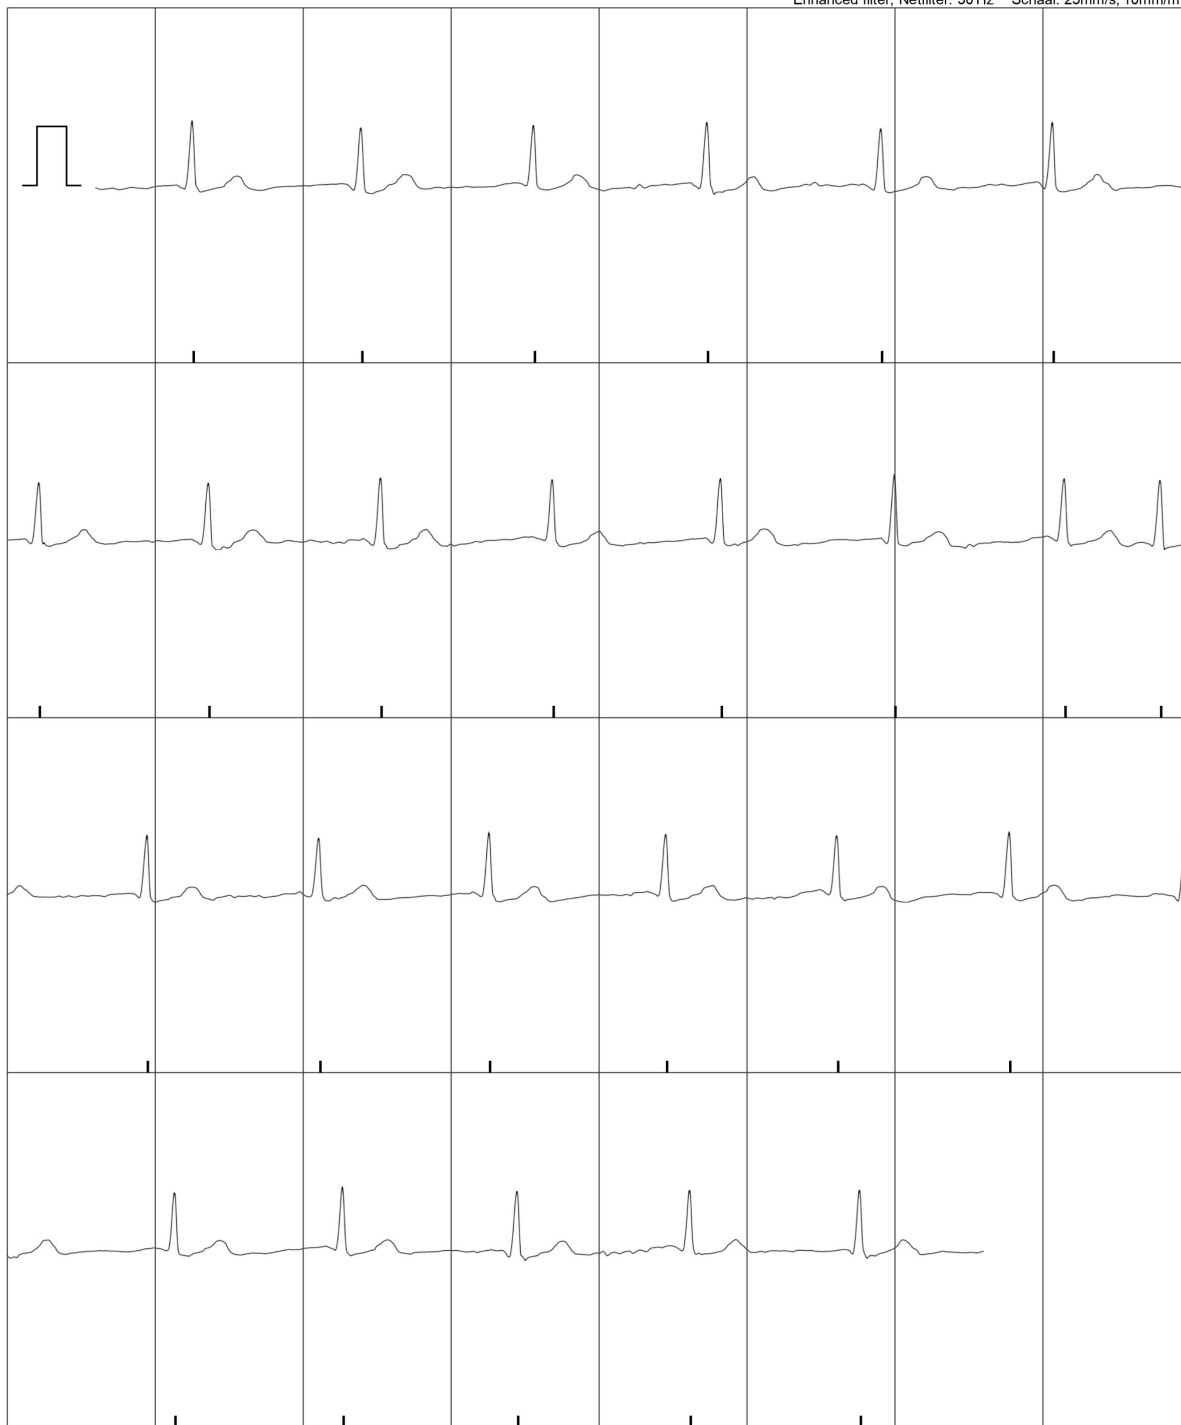



## INTERPRET-AF\_Single-lead\_ECG

\* 27. How would you classify the following measurement?

- ☐ Regular rhythm      ☐ One or more ectopic/missed heartbeats      ☐ Atrial flutter      ☐ Atrial fibrillation      ☐ Unreadable
- ☐ Other (please specify)



Schaal: 25mm/s, 10mm/mV

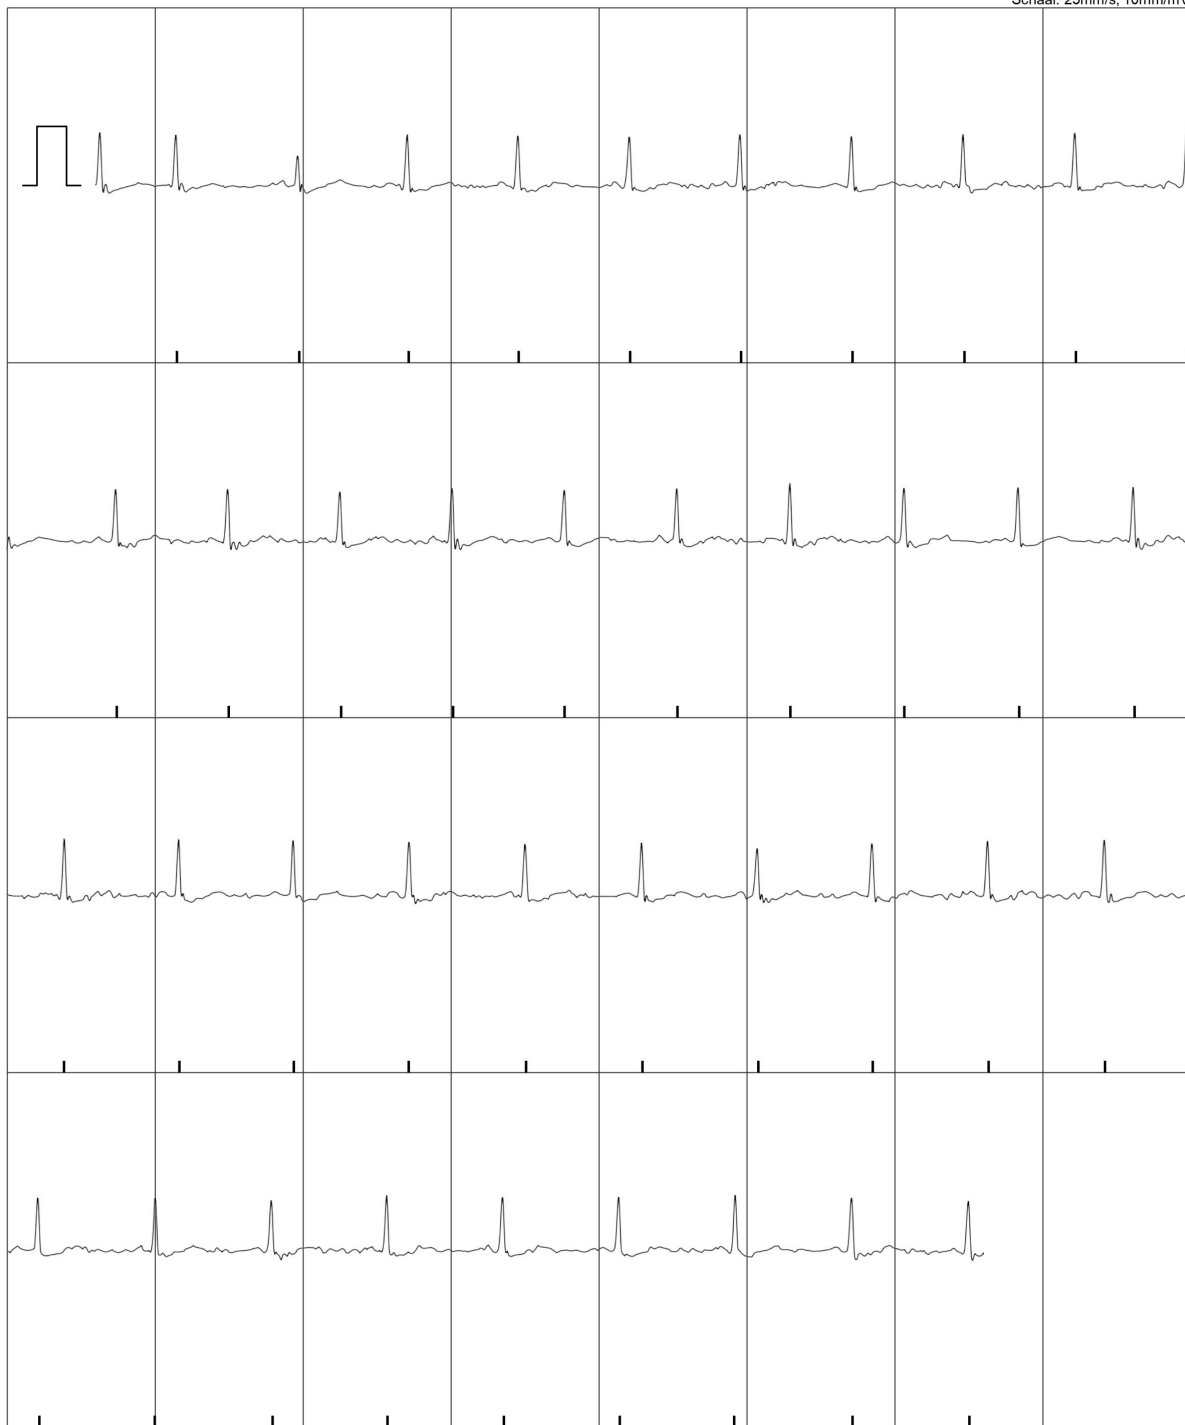



## INTERPRET-AF\_Single-lead\_ECG

\* 28. How would you classify the following measurement?

- ☐ Regular rhythm      ☐ One or more ectopic/missed heartbeats      ☐ Atrial flutter      ☐ Atrial fibrillation      ☐ Unreadable
- ☐ Other (please specify)

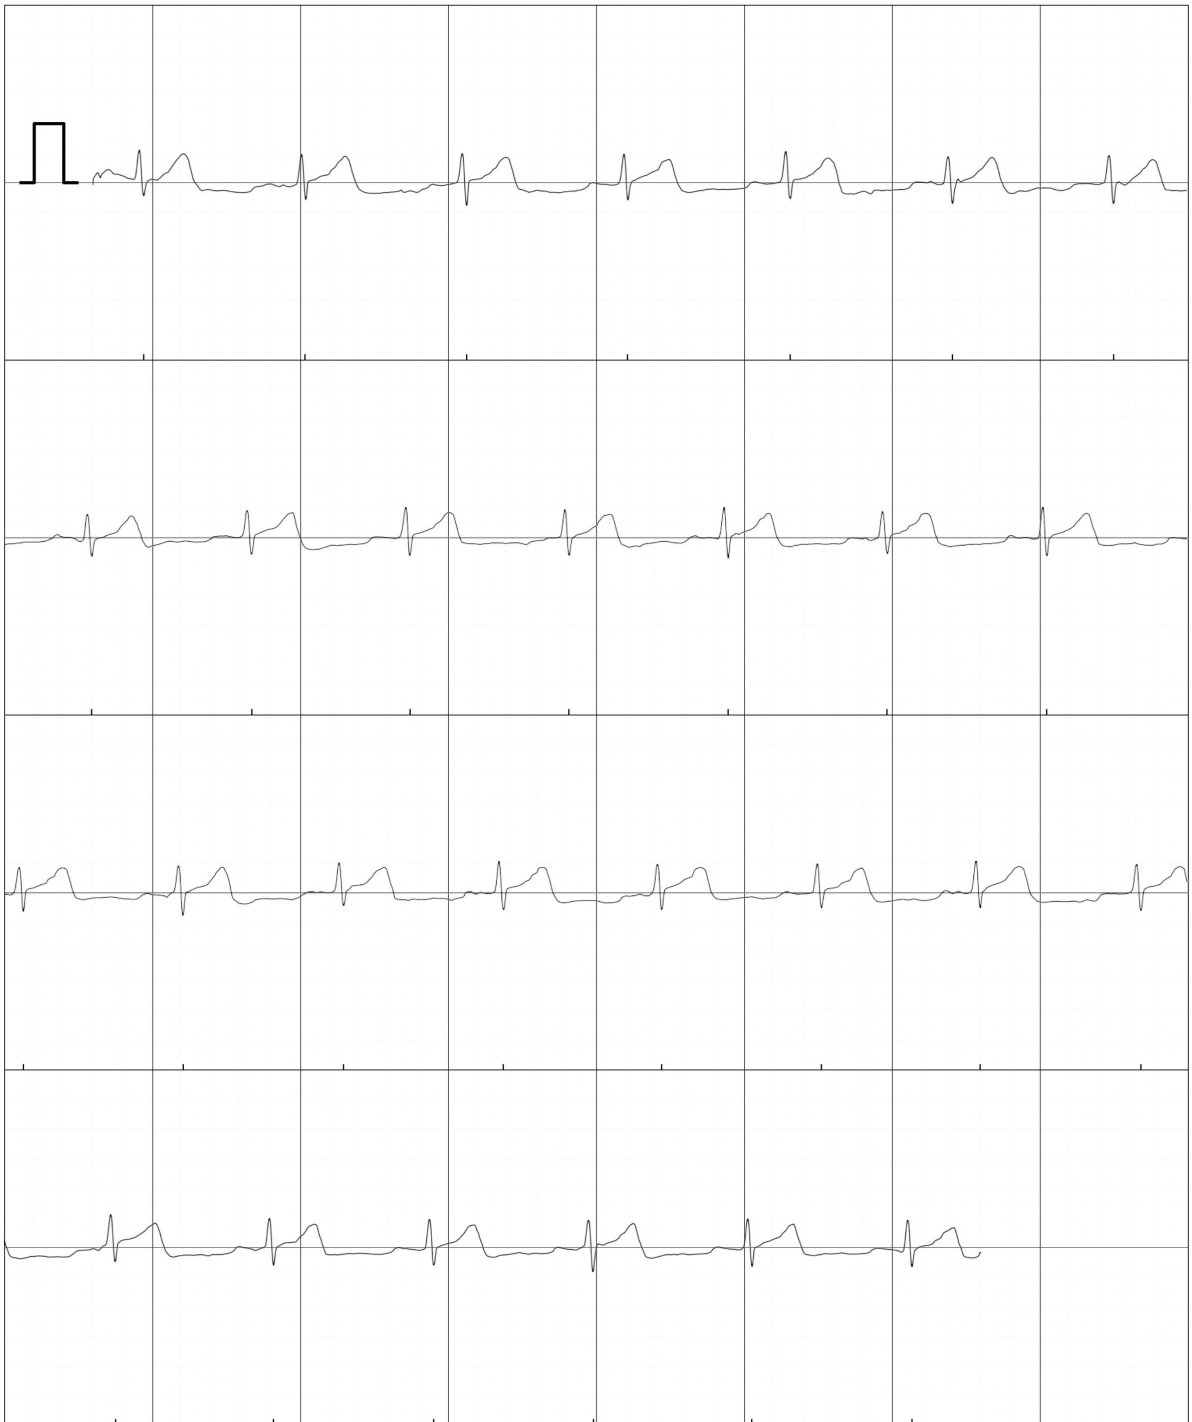



## INTERPRET-AF\_Single-lead\_ECG

\* 29. How would you classify the following measurement?

- ☐ Regular rhythm      ☐ One or more ectopic/missed heartbeats      ☐ Atrial flutter      ☐ Atrial fibrillation      ☐ Unreadable
- ☐ Other (please specify)

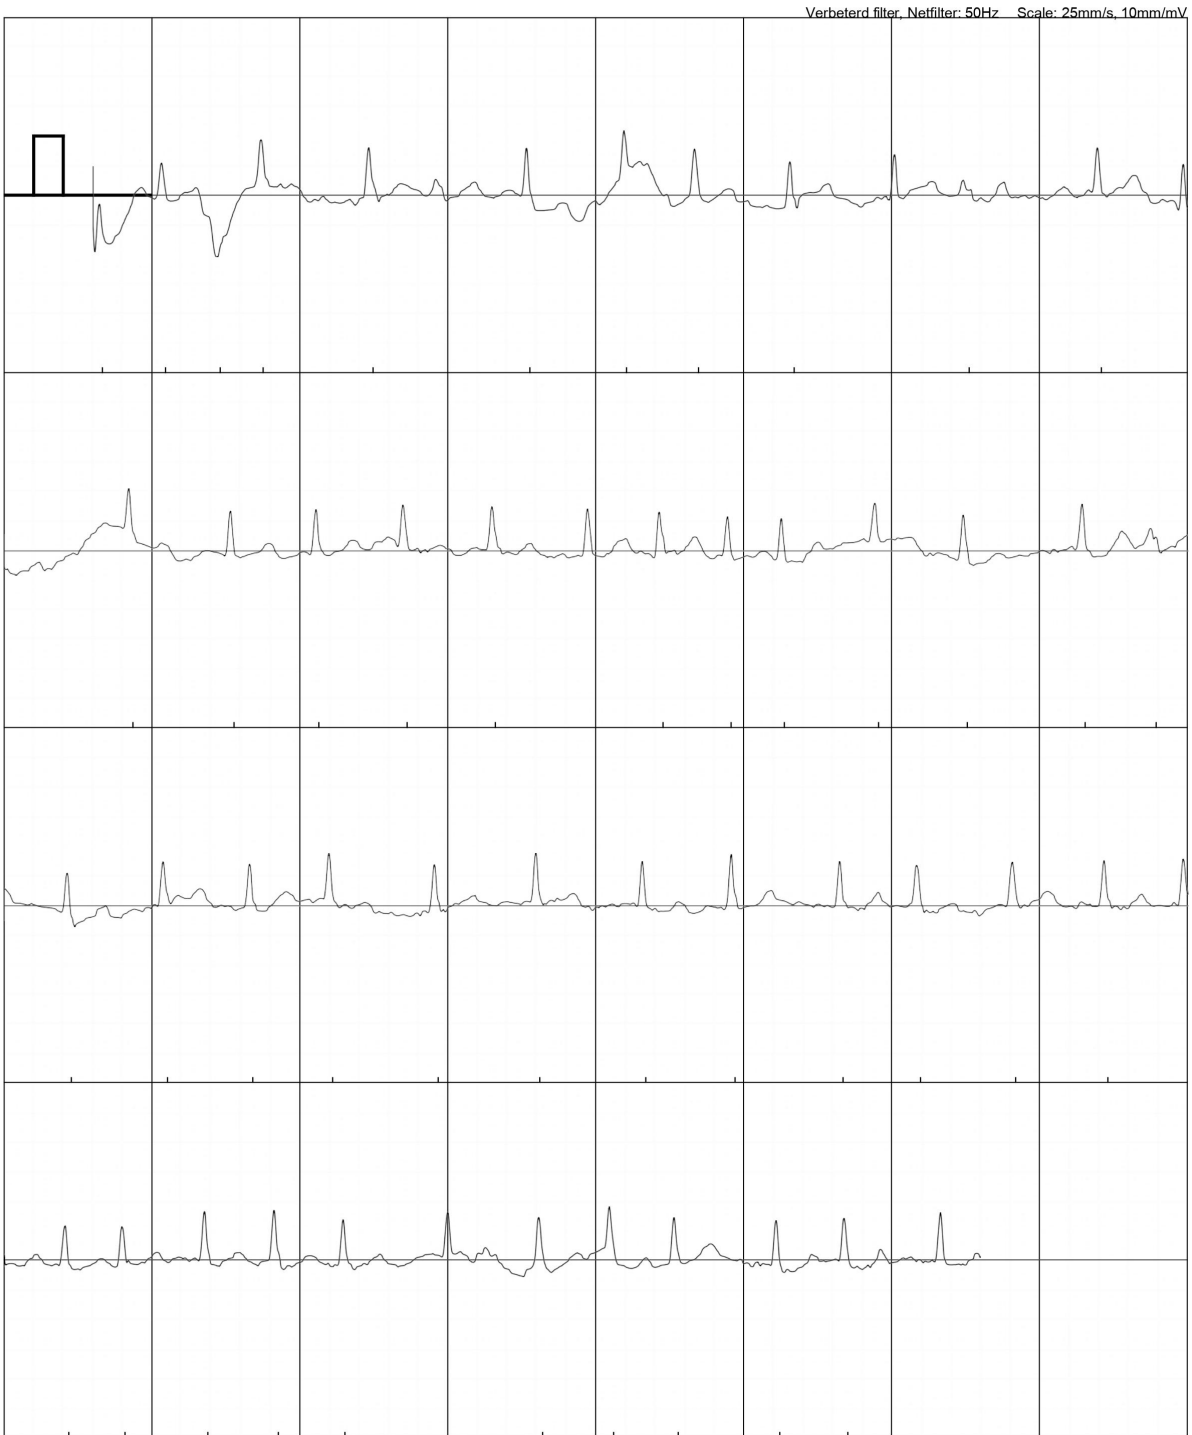





## INTERPRET-AF\_Single-lead\_ECG

\* 30. How would you classify the following measurement?

- ☐ Regular rhythm
- ☐ One or more ectopic/missed heartbeats
- ☐ Atrial flutter
- ☐ Atrial fibrillation
- ☐ Unreadable
- ☐ Other (please specify)

Enhanced filter, Netfilter: 50 Hz    Schaal: 25mm/s, 10mm/mV

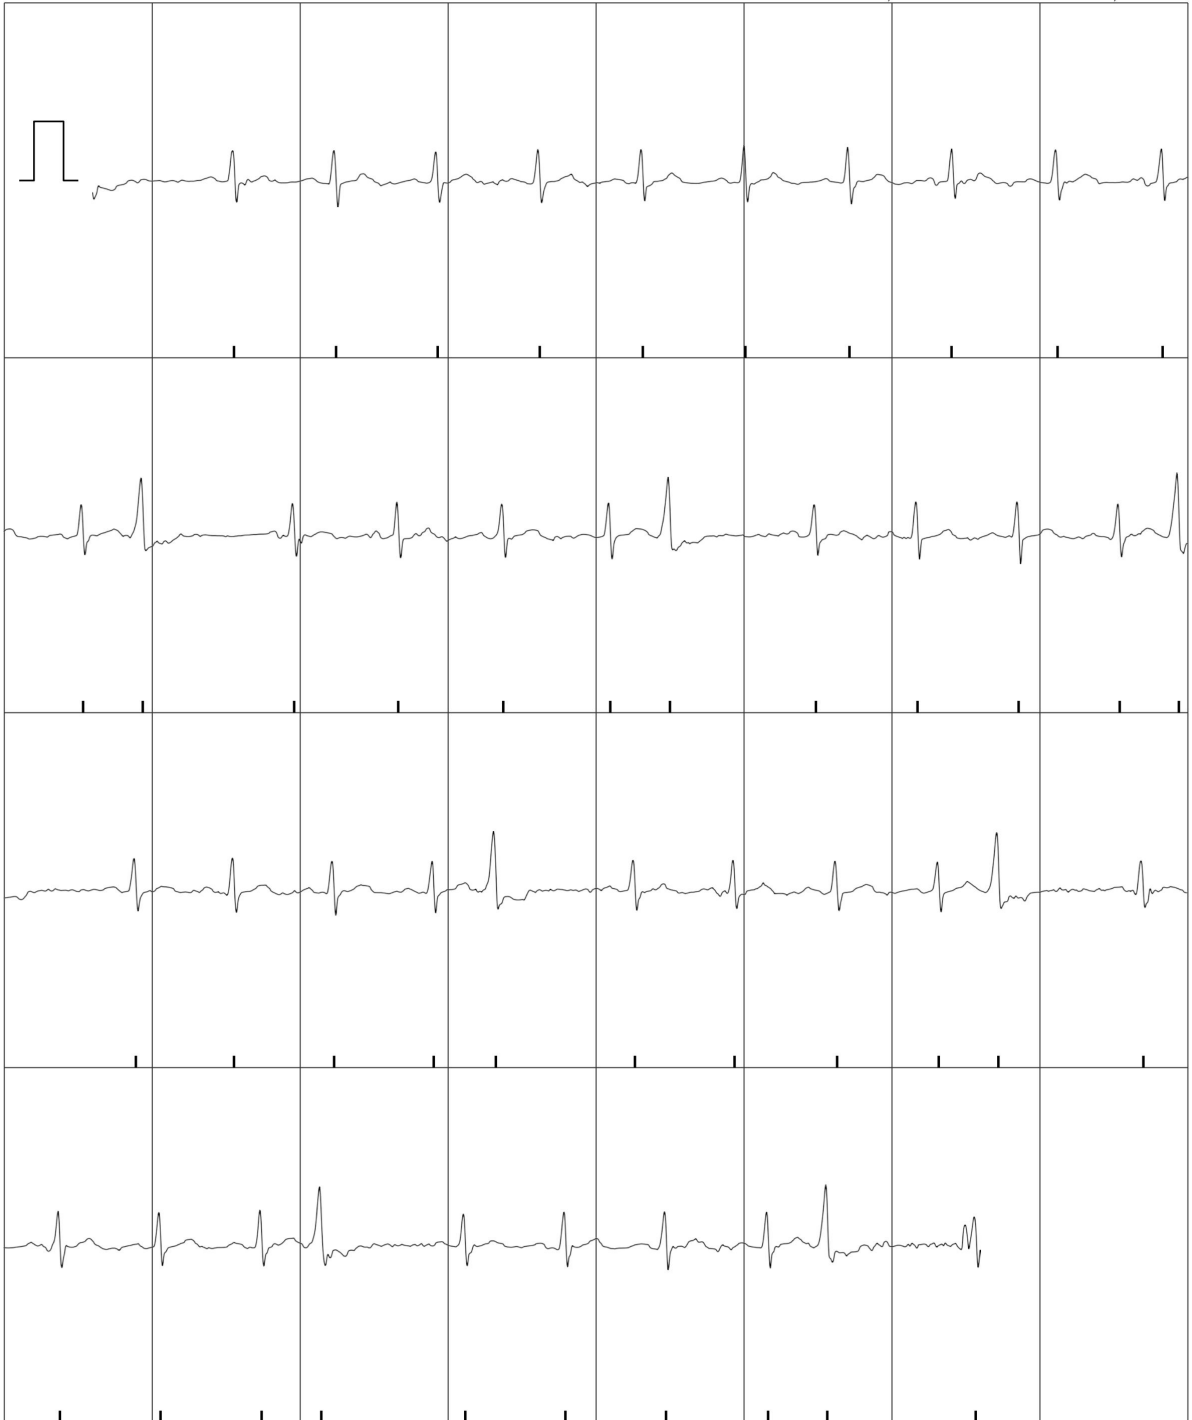



## INTERPRET-AF\_Single-lead\_ECG

\* 31. How would you classify the following measurement?

- ☐ Regular rhythm
- ☐ One or more ectopic/missed heartbeats
- ☐ Atrial flutter
- ☐ Atrial fibrillation
- ☐ Unreadable
- ☐ Other (please specify)

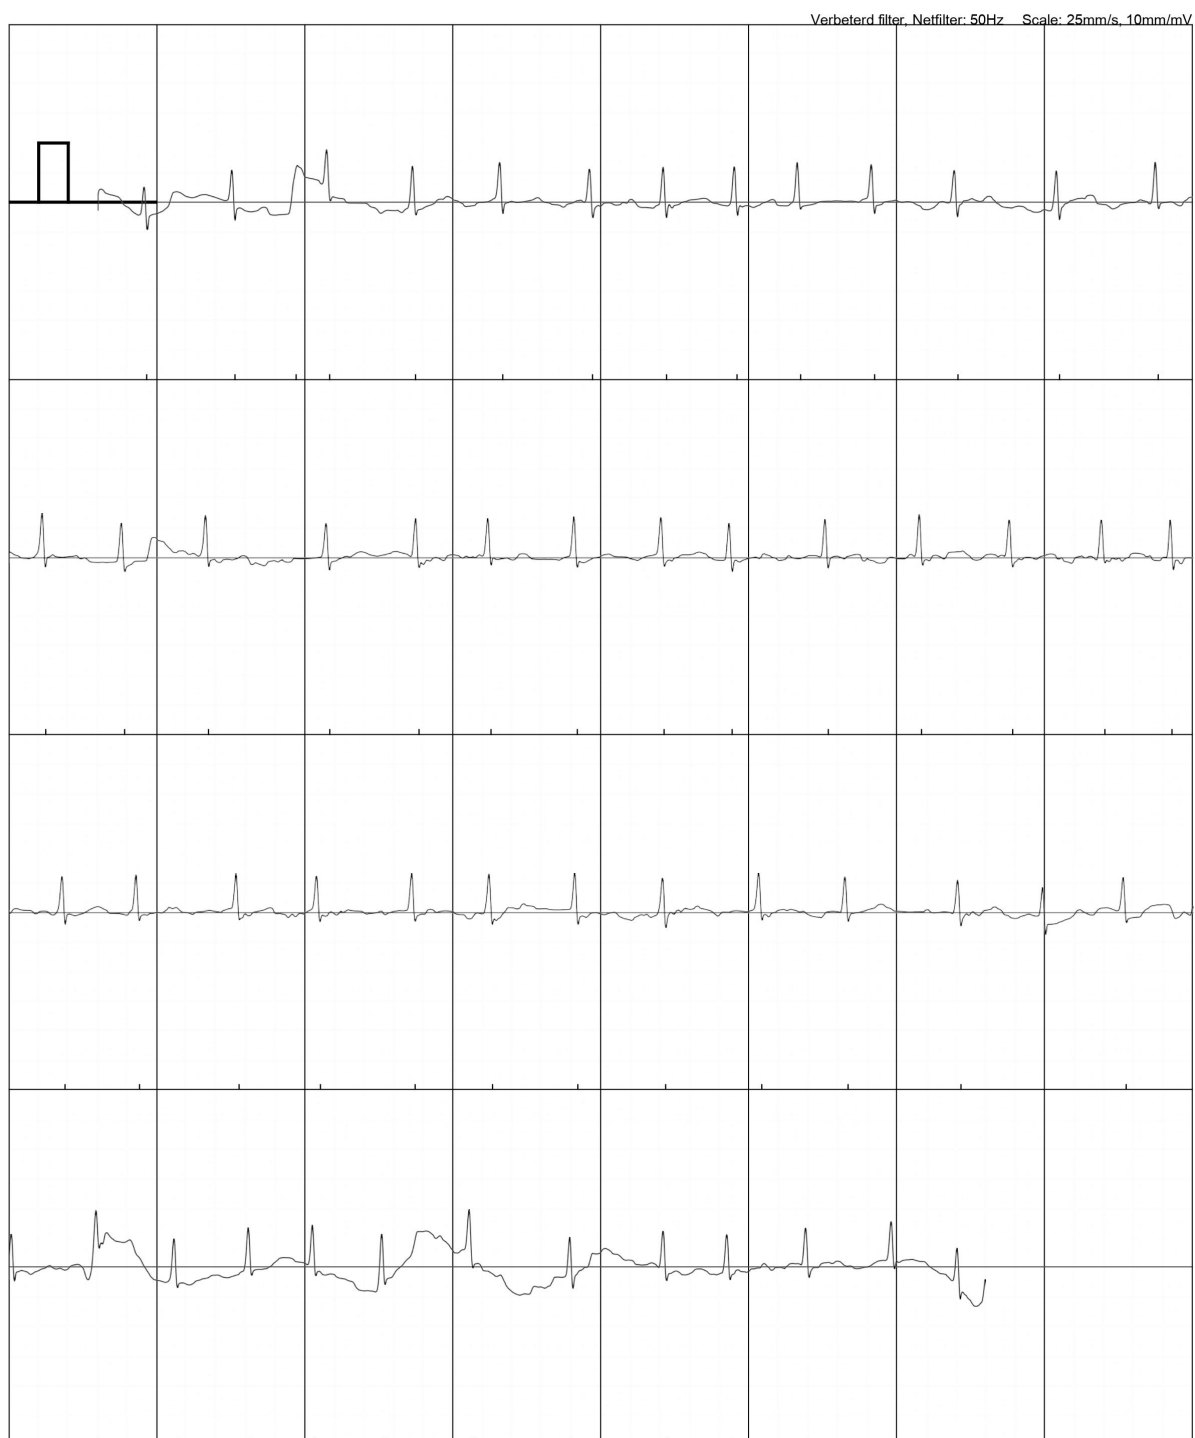

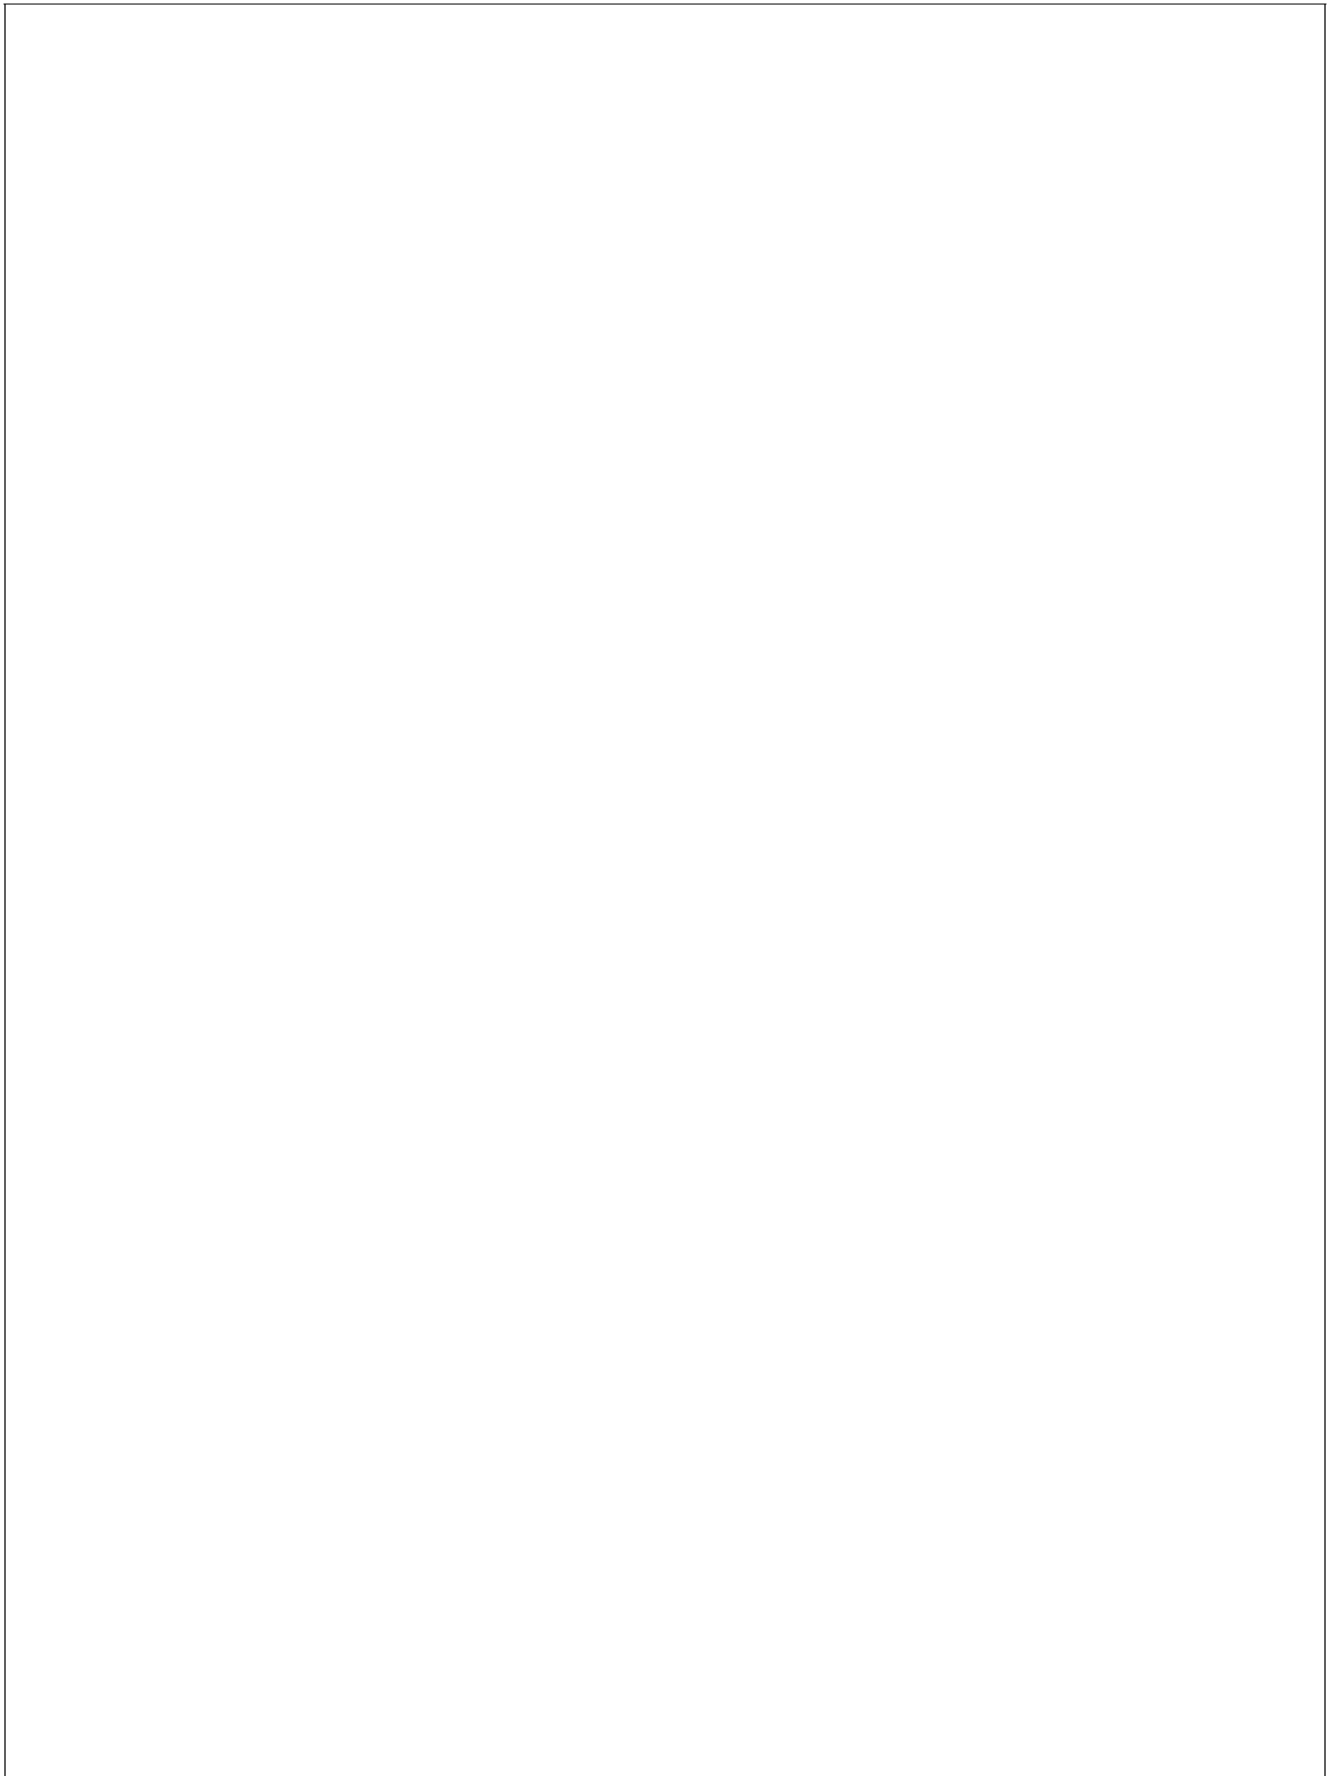

Supplement: Data_Sheet_2.PDF [file Data_Sheet_2.PDF]
