# Supplementary material for: Accuracy of Physicians Interpreting Photoplethysmography and Electrocardiography Tracings to Detect Atrial Fibrillation: INTERPRET-AF
Source: Frontiers journal article supplement (doi:10.3389/fcvm.2021.734737), 2021-09-20

## INTERPRET-AF I\_PPG

\* 9. How would you classify the following measurement?

- ☐ Regular rhythm      ☐ One or more ectopic/missed heartbeats      ☐ Atrial flutter      ☐ Atrial fibrillation      ☐ Unreadable
- ☐ Other (please specify)

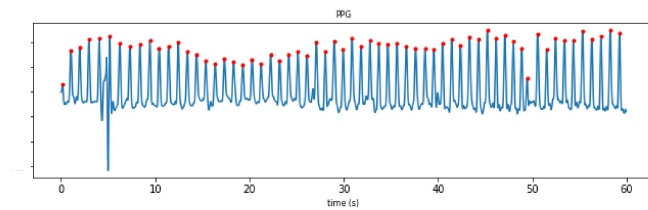

**Red dot:** potential heartbeat detected by the algorithm

## INTERPRET-AF I\_PPG

\* 10. How would you classify this measurement?

- ☐ Regular rhythm      ☐ One or more ectopic/missed heartbeats      ☐ Atrial flutter      ☐ Atrial fibrillation      ☐ Unreadable
- ☐ Other (please specify)

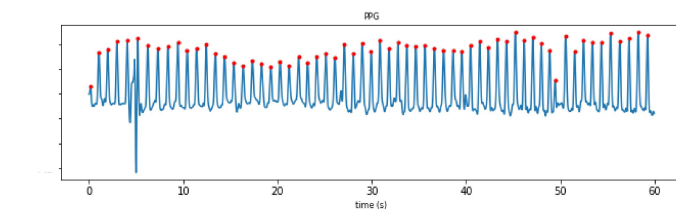

**Red dot:** potential heartbeat detected by the algorithm  
**Tachogram:** time between the detected peaks (RR-interval)  
**Poincaré:** duration of each RR-interval (RR n) in function of its preceding RR-interval (RR n-1)

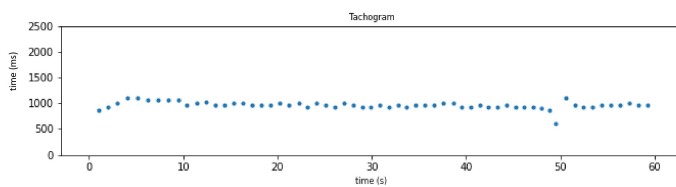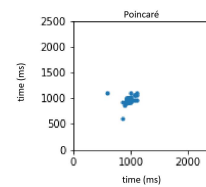

## INTERPRET-AF I\_PPG

\* 11. How would you classify the following measurement?

- ☐ Regular rhythm
- ☐ One or more ectopic/missed heartbeats
- ☐ Atrial flutter
- ☐ Atrial fibrillation
- ☐ Unreadable
- ☐ Other (please specify)

Algorithm output: normal (62 beats per minute)

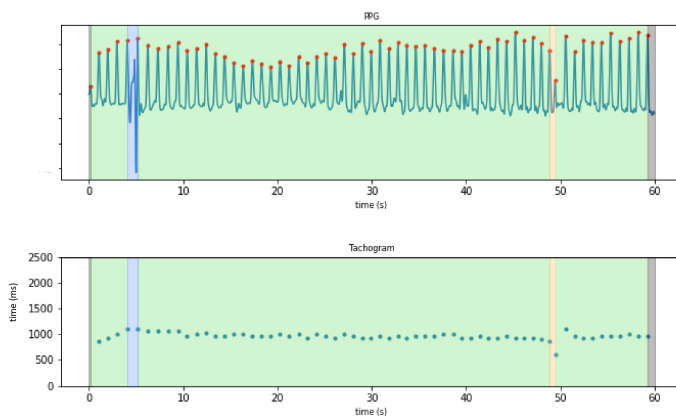

**Red dot:** potential heartbeat detected by the algorithm

**Tachogram:** time between the detected peaks (RR-interval)

**Poincaré:** duration of each RR-interval (RR n) in function of its preceding RR-interval (RR n-1)

**Green colour:** regular rhythm

**Orange colour:** one or more ectopic heartbeats

**Red colour:** atrial fibrillation

**Blue:** insufficient signal quality

## INTERPRET-AF I\_PPG

\* 12. How would you classify the following measurement?

- ☐ Regular rhythm      ☐ One or more ectopic/missed heartbeats      ☐ Atrial flutter      ☐ Atrial fibrillation      ☐ Unreadable
- ☐ Other (please specify)

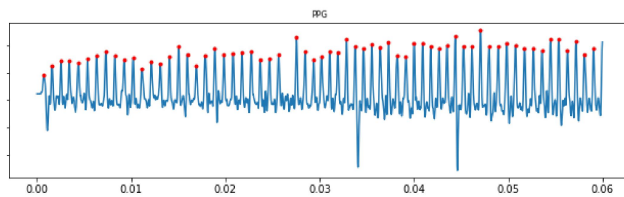

**Red dot:** potential heartbeat detected by the algorithm



## INTERPRET-AF I\_PPG

\* 13. How would you classify the following measurement?

- ☐ Regular rhythm      ☐ One or more ectopic/missed heartbeats      ☐ Atrial flutter      ☐ Atrial fibrillation      ☐ Unreadable
- ☐ Other (please specify)

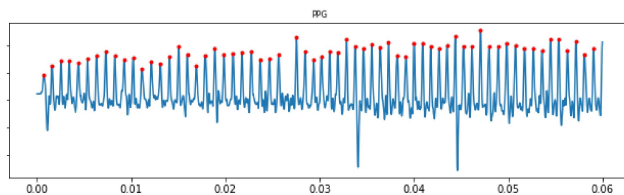

**Red dot:** potential heartbeat detected by the algorithm  
**Tachogram:** time between the detected peaks (RR-interval)  
**Poincaré:** duration of each RR-interval (RR n) in function of its preceding RR-interval (RR n-1)

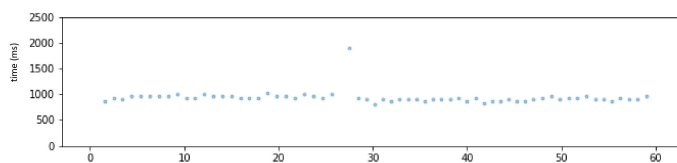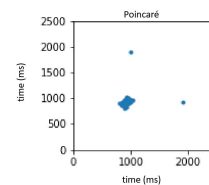

## INTERPRET-AF I\_PPG

\* 14. How would you classify the following measurement?

- ☐ Regular rhythm      ☐ One or more ectopic/missed heartbeats      ☐ Atrial flutter      ☐ Atrial fibrillation      ☐ Unreadable
- ☐ Other (please specify)

Algorithm output: normal (55 beats per minute)

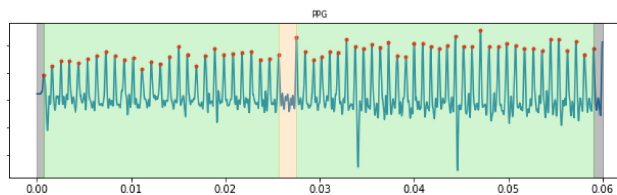

**Red dot:** potential heartbeat detected by the algorithm  
**Tachogram:** time between the detected peaks (RR-interval)  
**Poincaré:** duration of each RR-interval (RR n) in function of its preceding RR-interval (RR n-1)  
**Green colour:** regular rhythm  
**Orange colour:** one or more ectopic heartbeats  
**Red colour:** atrial fibrillation  
**Blue:** insufficient signal quality

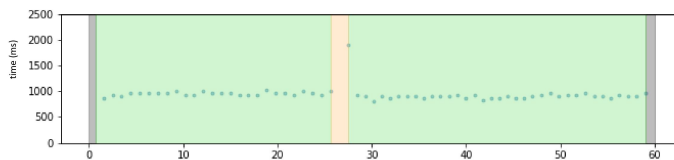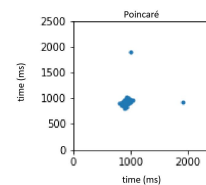

## INTERPRET-AF I\_PPG

\* 15. How would you classify the following measurement?

- ☐ Regular rhythm      ☐ One or more ectopic/missed heartbeats      ☐ Atrial flutter      ☐ Atrial fibrillation      ☐ Unreadable
- ☐ Other (please specify)

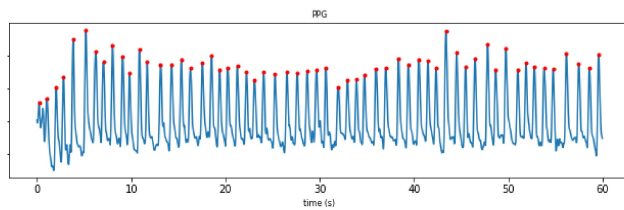

**Red dot:** potential heartbeat detected by the algorithm

## INTERPRET-AF I\_PPG

\* 16. How would you classify the following measurement?

- ☐ Regular rhythm      ☐ One or more ectopic/missed heartbeats      ☐ Atrial flutter      ☐ Atrial fibrillation      ☐ Unreadable
- ☐ Other (please specify)

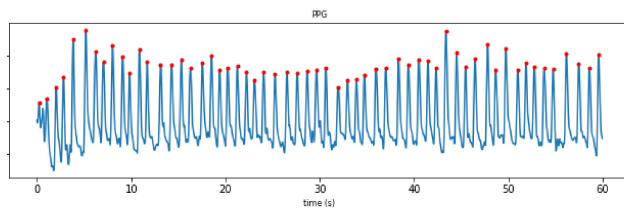

**Red dot:** potential heartbeat detected by the algorithm  
**Tachogram:** time between the detected peaks (RR-interval)  
**Poincaré:** duration of each RR-interval (RR n) in function of its preceding RR-interval (RR n-1)

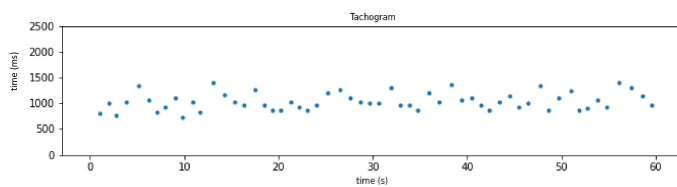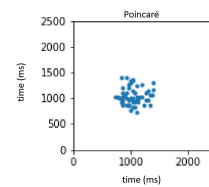

## INTERPRET-AF I\_PPG

\* 17. How would you classify the following measurement?

- ☐ Regular rhythm      ☐ One or more ectopic/missed heartbeats      ☐ Atrial flutter      ☐ Atrial fibrillation      ☐ Unreadable
- ☐ Other (please specify)

Algorithm output: urgent (58 beats per minute)

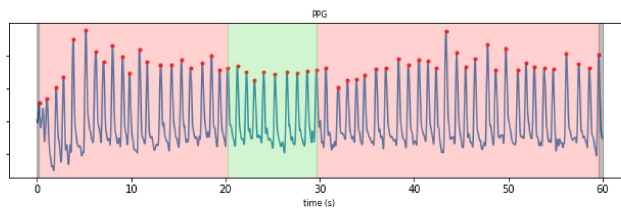

**Red dot:** potential heartbeat detected by the algorithm  
**Tachogram:** time between the detected peaks (RR-interval)  
**Poincaré:** duration of each RR-interval (RR n) in function of its preceding RR-interval (RR n-1)  
**Green colour:** regular rhythm  
**Orange colour:** one or more ectopic heartbeats  
**Red colour:** atrial fibrillation  
**Blue:** insufficient signal quality

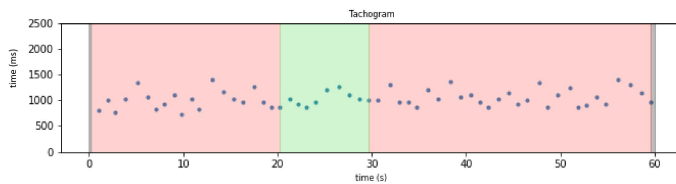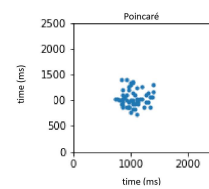

## INTERPRET-AF I\_PPG

\* 18. How would you classify the following measurement?

- ☐ Regular rhythm      ☐ One or more ectopic/missed heartbeats      ☐ Atrial flutter      ☐ Atrial fibrillation      ☐ Unreadable
- ☐ Other (please specify)

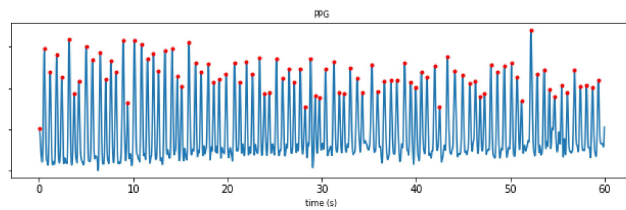

**Red dot:** potential heartbeat detected by the algorithm

## INTERPRET-AF I\_PPG

\* 19. How would you classify the following measurement?

- ☐ Regular rhythm      ☐ One or more ectopic/missed heartbeats      ☐ Atrial flutter      ☐ Atrial fibrillation      ☐ Unreadable
- ☐ Other (please specify)

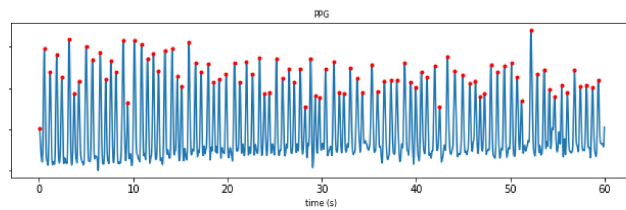

**Red dot:** potential heartbeat detected by the algorithm  
**Tachogram:** time between the detected peaks (RR-interval)  
**Poincaré:** duration of each RR-interval (RR n) in function of its preceding RR-interval (RR n-1)

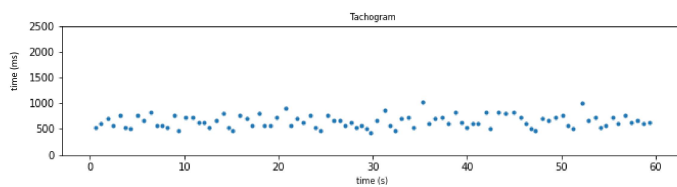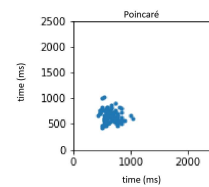

## INTERPRET-AF I\_PPG

\* 20. How would you classify the following measurement?

- ☐ Regular rhythm      ☐ One or more ectopic/missed heartbeats      ☐ Atrial flutter      ☐ Atrial fibrillation      ☐ Unreadable
- ☐ Other (please specify)

Algorithm output: urgent (58 beats per minute)

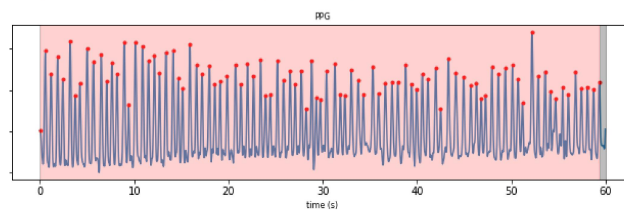

**Red dot:** potential heartbeat detected by the algorithm  
**Tachogram:** time between the detected peaks (RR-interval)  
**Poincaré:** duration of each RR-interval (RR n) in function of its preceding RR-interval (RR n-1)  
**Green colour:** regular rhythm  
**Orange colour:** one or more ectopic heartbeats  
**Red colour:** atrial fibrillation  
**Blue:** insufficient signal quality

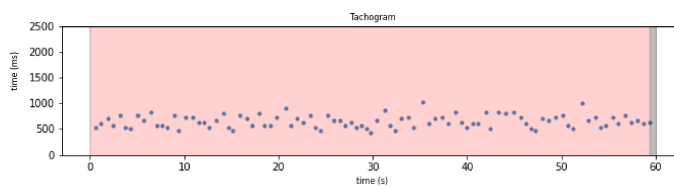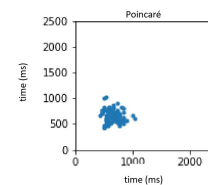



## INTERPRET-AF I\_PPG

\* 21. How would you classify the following measurement?

- ☐ Regular rhythm      ☐ One or more ectopic/missed heartbeats      ☐ Atrial flutter      ☐ Atrial fibrillation      ☐ Unreadable
- ☐ Other (please specify)

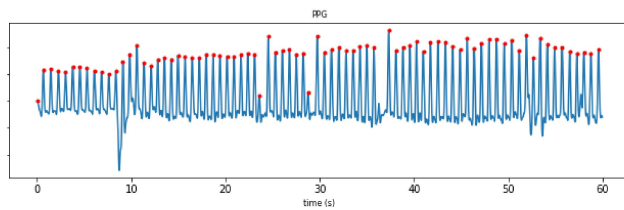

**Red dot:** potential heartbeat detected by the algorithm

## INTERPRET-AF I\_PPG

\* 22. How would you classify the following measurement?

- ☐ Regular rhythm      ☐ One or more ectopic/missed heartbeats      ☐ Atrial flutter      ☐ Atrial fibrillation      ☐ Unreadable
- ☐ Other (please specify)

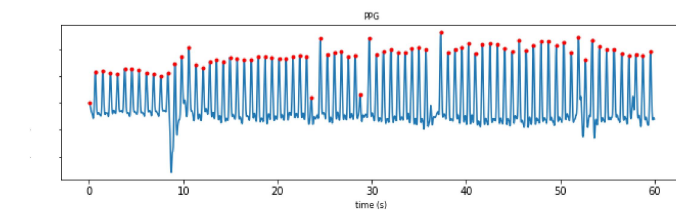

**Red dot:** potential heartbeat detected by the algorithm

**Tachogram:** time between the detected peaks (RR-interval)

**Poincaré:** duration of each RR-interval (RR n) in function of its preceding RR-interval (RR n-1)

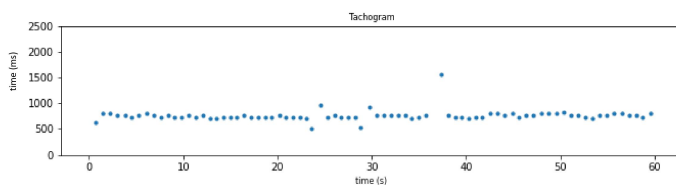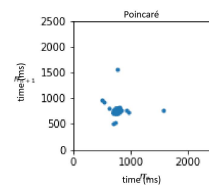

## INTERPRET-AF I\_PPG

\* 23. How would you classify the following measurement?

- ☐ Regular rhythm      ☐ One or more ectopic/missed heartbeats      ☐ Atrial flutter      ☐ Atrial fibrillation      ☐ Unreadable
- ☐ Other (please specify)

Algorithm output: warning (79 beats per minute)

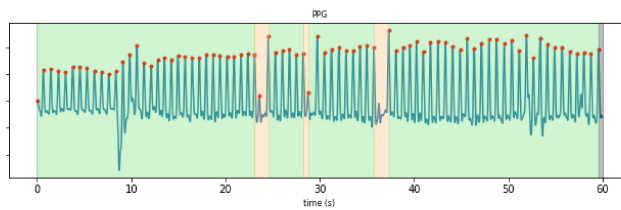

**Red dot:** potential heartbeat detected by the algorithm  
**Tachogram:** time between the detected peaks (RR-interval)  
**Poincaré:** duration of each RR-interval (RR n) in function of its preceding RR-interval (RR n-1)  
**Green colour:** regular rhythm  
**Orange colour:** one or more ectopic heartbeats  
**Red colour:** atrial fibrillation  
**Blue:** insufficient signal quality

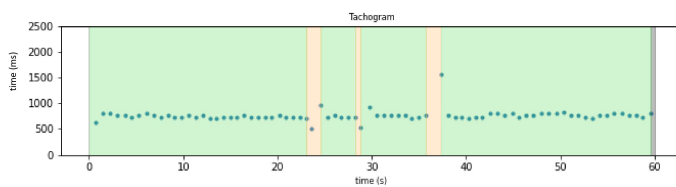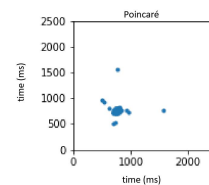

## INTERPRET-AF I\_PPG

\* 24. How would you classify the following measurement?

- ☐ Regular rhythm      ☐ One or more ectopic/missed heartbeats      ☐ Atrial flutter      ☐ Atrial fibrillation      ☐ Unreadable
- ☐ Other (please specify)

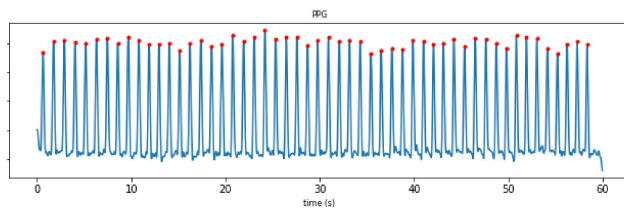

**Red dot:** potential heartbeat detected by the algorithm

## INTERPRET-AF I\_PPG

\* 25. How would you classify the following measurement?

- ☐ Regular rhythm      ☐ One or more ectopic/missed heartbeats      ☐ Atrial flutter      ☐ Atrial fibrillation      ☐ Unreadable
- ☐ Other (please specify)



**Red dot:** potential heartbeat detected by the algorithm  
**Tachogram:** time between the detected peaks (RR-interval)  
**Poincaré:** duration of each RR-interval (RR n) in function of its preceding RR-interval (RR n-1)

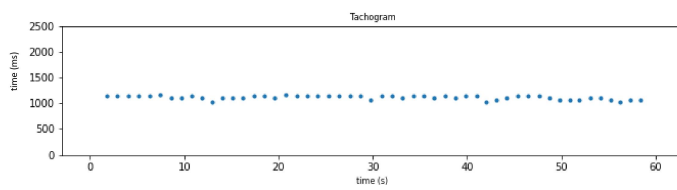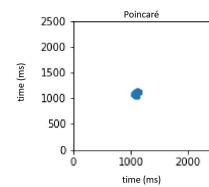

## INTERPRET-AF I\_PPG

\* 26. How would you classify the following measurement?

- ☐ Regular rhythm      ☐ One or more ectopic/missed heartbeats      ☐ Atrial flutter      ☐ Atrial fibrillation      ☐ Unreadable
- ☐ Other (please specify)

Algorithm output: normal (54 beats per minute)

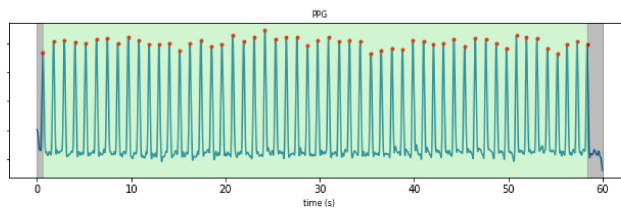

**Red dot:** potential heartbeat detected by the algorithm  
**Tachogram:** time between the detected peaks (RR-interval)  
**Poincaré:** duration of each RR-interval (RR n) in function of its preceding RR-interval (RR n-1)  
**Green colour:** regular rhythm  
**Orange colour:** one or more ectopic heartbeats  
**Red colour:** atrial fibrillation  
**Blue:** insufficient signal quality

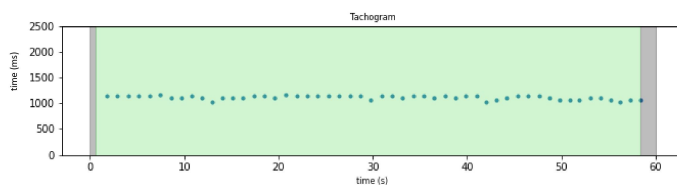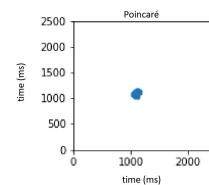

## INTERPRET-AF I\_PPG

\* 27. How would you classify the following measurement?

- ☐ Regular rhythm      ☐ One or more ectopic/missed heartbeats      ☐ Atrial flutter      ☐ Atrial fibrillation      ☐ Unreadable
- ☐ Other (please specify)

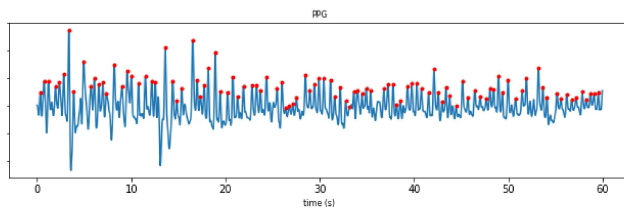

**Red dot:** potential heartbeat detected by the algorithm

## INTERPRET-AF I\_PPG

\* 28. How would you classify the following measurement?

- ☐ Regular rhythm      ☐ One or more ectopic/missed heartbeats      ☐ Atrial flutter      ☐ Atrial fibrillation      ☐ Unreadable
- ☐ Other (please specify)



**Red dot:** potential heartbeat detected by the algorithm  
**Tachogram:** time between the detected peaks (RR-interval)  
**Poincaré:** duration of each RR-interval (RR n) in function of its preceding RR-interval (RR n-1)

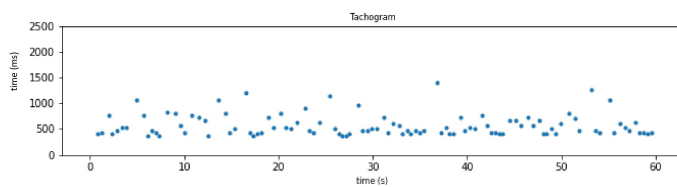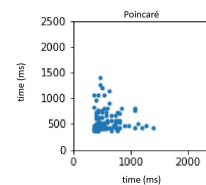



## INTERPRET-AF I\_PPG

\* 29. How would you classify the following measurement?

- ☐ Regular rhythm      ☐ One or more ectopic/missed heartbeats      ☐ Atrial flutter      ☐ Atrial fibrillation      ☐ Unreadable
- ☐ Other (please specify)

Algorithm output: urgent (105 beats per minute)

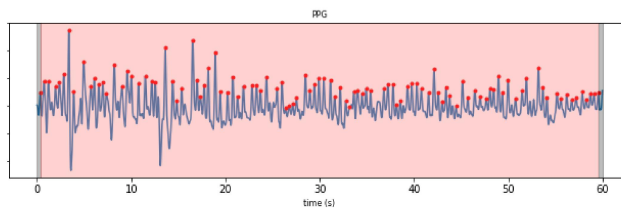

**Red dot:** potential heartbeat detected by the algorithm  
**Tachogram:** time between the detected peaks (RR-interval)  
**Poincaré:** duration of each RR-interval (RR n) in function of its preceding RR-interval (RR n-1)  
**Green colour:** regular rhythm  
**Orange colour:** one or more ectopic heartbeats  
**Red colour:** atrial fibrillation  
**Blue:** insufficient signal quality

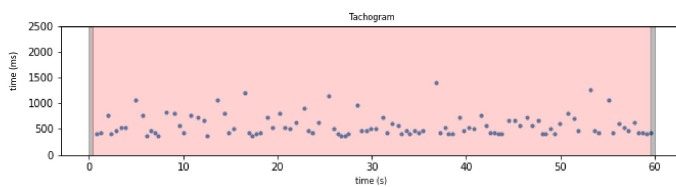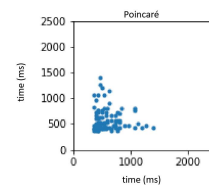

## INTERPRET-AF I\_PPG

\* 30. How would you classify the following measurement?

- ☐ Regular rhythm      ☐ One or more ectopic/missed heartbeats      ☐ Atrial flutter      ☐ Atrial fibrillation      ☐ Unreadable
- ☐ Other (please specify)

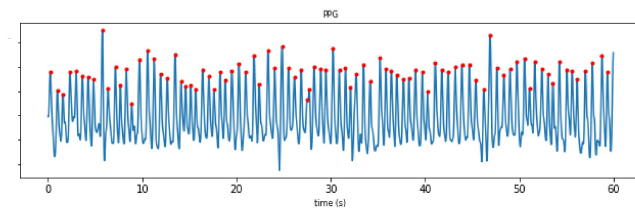

**Red dot:** potential heartbeat detected by the algorithm

## INTERPRET-AF I\_PPG

\* 31. How would you classify the following measurement?

- ☐ Regular rhythm      ☐ One or more ectopic/missed heartbeats      ☐ Atrial flutter      ☐ Atrial fibrillation      ☐ Unreadable
- ☐ Other (please specify)

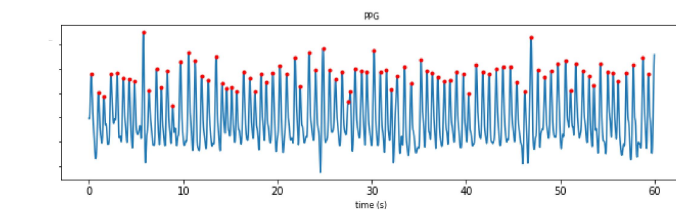

**Red dot:** potential heartbeat detected by the algorithm  
**Tachogram:** time between the detected peaks (RR-interval)  
**Poincaré:** duration of each RR-interval (RR n) in function of its preceding RR-interval (RR n-1)

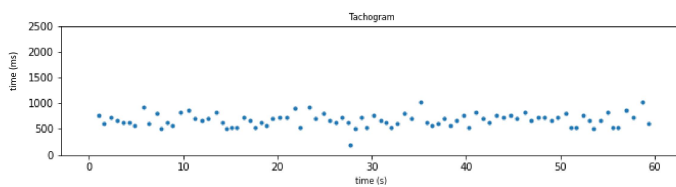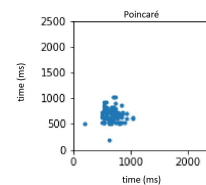

## INTERPRET-AF I\_PPG

\* 32. How would you classify the following measurement?

- ☐ Regular rhythm      ☐ One or more ectopic/missed heartbeats      ☐ Atrial flutter      ☐ Atrial fibrillation      ☐ Unreadable
- ☐ Other (please specify)

Algorithm output: urgent (88 beats per minute)

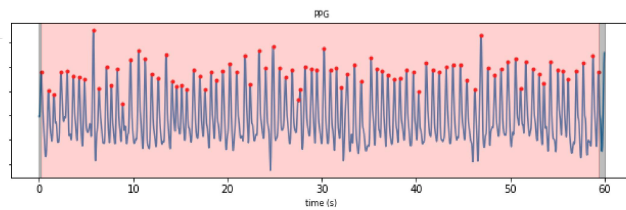

**Red dot:** potential heartbeat detected by the algorithm  
**Tachogram:** time between the detected peaks (RR-interval)  
**Poincaré:** duration of each RR-interval (RR n) in function of its preceding RR-interval (RR n-1)  
**Green colour:** regular rhythm  
**Orange colour:** one or more ectopic heartbeats  
**Red colour:** atrial fibrillation  
**Blue:** insufficient signal quality

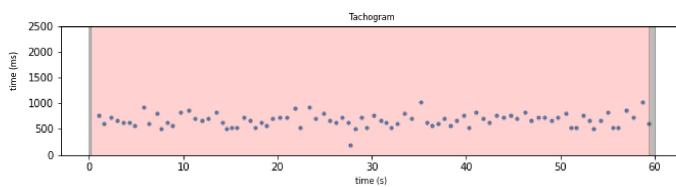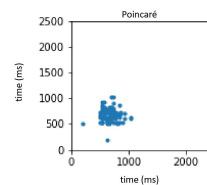

## INTERPRET-AF I\_PPG

\* 33. How would you classify the following measurement?

- ☐ Regular rhythm      ☐ One or more ectopic/missed heartbeats      ☐ Atrial flutter      ☐ Atrial fibrillation      ☐ Unreadable
- ☐ Other (please specify)

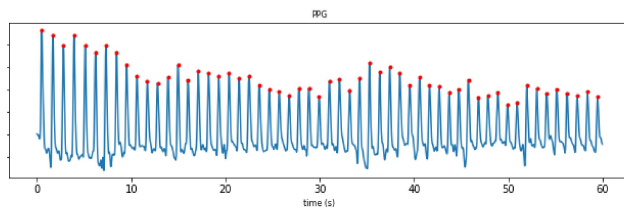

**Red dot:** potential heartbeat detected by the algorithm

## INTERPRET-AF I\_PPG

\* 34. How would you classify the following measurement?

- ☐ Regular rhythm      ☐ One or more ectopic/missed heartbeats      ☐ Atrial flutter      ☐ Atrial fibrillation      ☐ Unreadable
- ☐ Other (please specify)



**Red dot:** potential heartbeat detected by the algorithm  
**Tachogram:** time between the detected peaks (RR-interval)  
**Poincaré:** duration of each RR-interval (RR n) in function of its preceding RR-interval (RR n-1)

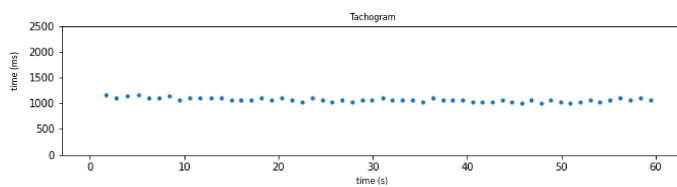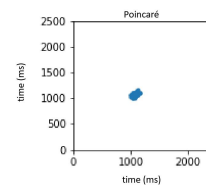

## INTERPRET-AF I\_PPG

\* 35. How would you classify the following measurement?

- ☐ Regular rhythm      ☐ One or more ectopic/missed heartbeats      ☐ Atrial flutter      ☐ Atrial fibrillation      ☐ Unreadable
- ☐ Other (please specify)

Algorithm output: normal (56 beats per minute)

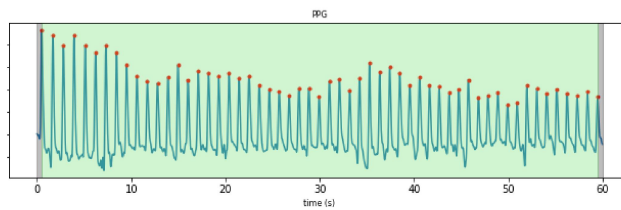

**Red dot:** potential heartbeat detected by the algorithm

**Tachogram:** time between the detected peaks (RR-interval)

**Poincaré:** duration of each RR-interval (RR n) in function of its preceding RR-interval (RR n-1)

**Green colour:** regular rhythm

**Orange colour:** one or more ectopic heartbeats

**Red colour:** atrial fibrillation

**Blue:** insufficient signal quality

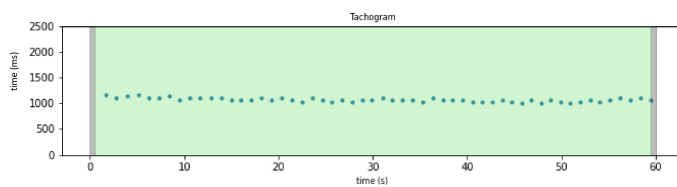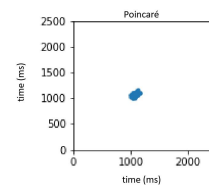

## INTERPRET-AF I\_PPG

\* 36. How would you classify the following measurement?

- ☐ Regular rhythm      ☐ One or more ectopic/missed heartbeats      ☐ Atrial flutter      ☐ Atrial fibrillation      ☐ Unreadable
- ☐ Other (please specify)

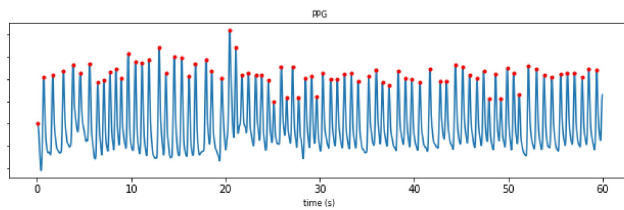

**Red dot:** potential heartbeat detected by the algorithm



## INTERPRET-AF I\_PPG

\* 37. How would you classify the following measurement?

- ☐ Regular rhythm      ☐ One or more ectopic/missed heartbeats      ☐ Atrial flutter      ☐ Atrial fibrillation      ☐ Unreadable
- ☐ Other (please specify)

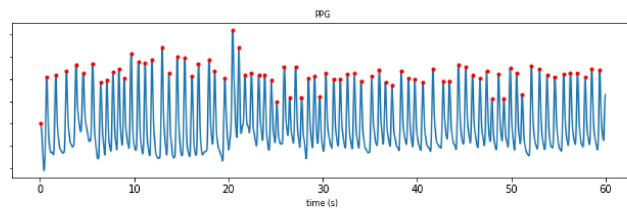

**Red dot:** potential heartbeat detected by the algorithm  
**Tachogram:** time between the detected peaks (RR-interval)  
**Poincaré:** duration of each RR-interval (RR n) in function of its preceding RR-interval (RR n-1)

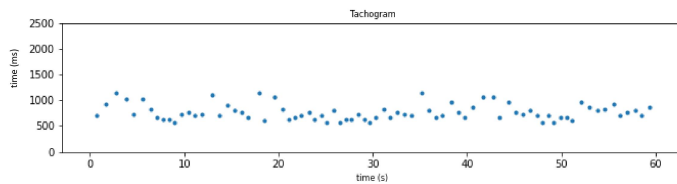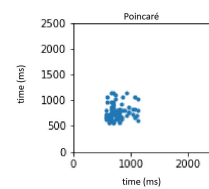

## INTERPRET-AF I\_PPG

\* 38. How would you classify the following measurement?

- ☐ Regular rhythm      ☐ One or more ectopic/missed heartbeats      ☐ Atrial flutter      ☐ Atrial fibrillation      ☐ Unreadable
- ☐ Other (please specify)

Algorithm output: urgent (78 beats per minute)

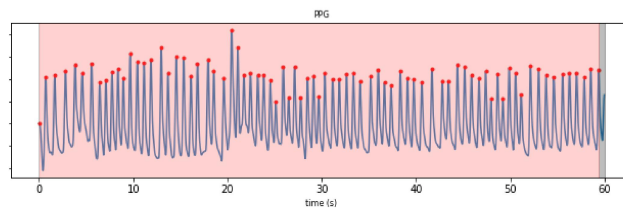

**Red dot:** potential heartbeat detected by the algorithm  
**Tachogram:** time between the detected peaks (RR-interval)  
**Poincaré:** duration of each RR-interval (RR n) in function of its preceding RR-interval (RR n-1)  
**Green colour:** regular rhythm  
**Orange colour:** one or more ectopic heartbeats  
**Red colour:** atrial fibrillation  
**Blue:** insufficient signal quality

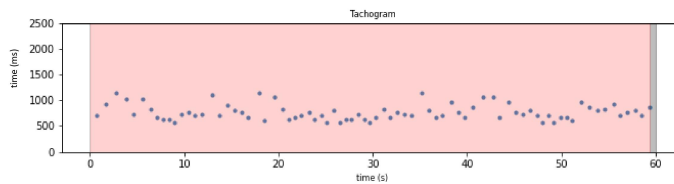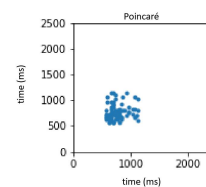

## INTERPRET-AF I\_PPG

\* 39. How would you classify the following measurement?

- ☐ Regular rhythm      ☐ One or more ectopic/missed heartbeats      ☐ Atrial flutter      ☐ Atrial fibrillation      ☐ Unreadable
- ☐ Other (please specify)

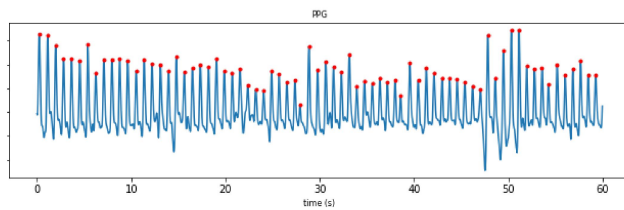

**Red dot:** potential heartbeat detected by the algorithm

## INTERPRET-AF I\_PPG

\* 40. How would you classify the following measurement?

- ☐ Regular rhythm      ☐ One or more ectopic/missed heartbeats      ☐ Atrial flutter      ☐ Atrial fibrillation      ☐ Unreadable
- ☐ Other (please specify)



**Red dot:** potential heartbeat detected by the algorithm  
**Tachogram:** time between the detected peaks (RR-interval)  
**Poincaré:** duration of each RR-interval (RR n) in function of its preceding RR-interval (RR n-1)

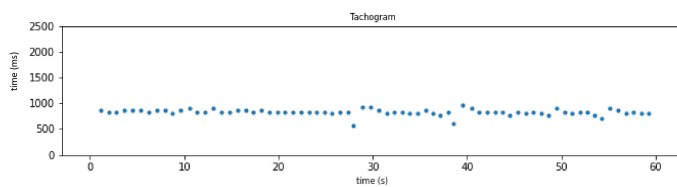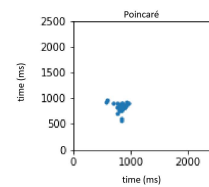

## INTERPRET-AF I\_PPG

\* 41. How would you classify the following measurement?

- ☐ Regular rhythm      ☐ One or more ectopic/missed heartbeats      ☐ Atrial flutter      ☐ Atrial fibrillation      ☐ Unreadable
- ☐ Other (please specify)

Algorithm output: warning (72 beats per minute)

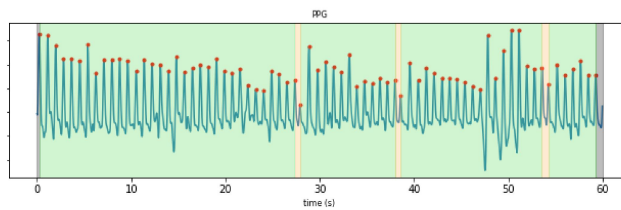

**Red dot:** potential heartbeat detected by the algorithm  
**Tachogram:** time between the detected peaks (RR-interval)  
**Poincaré:** duration of each RR-interval (RR n) in function of its preceding RR-interval (RR n-1)  
**Green colour:** regular rhythm  
**Orange colour:** one or more ectopic heartbeats  
**Red colour:** atrial fibrillation  
**Blue:** insufficient signal quality

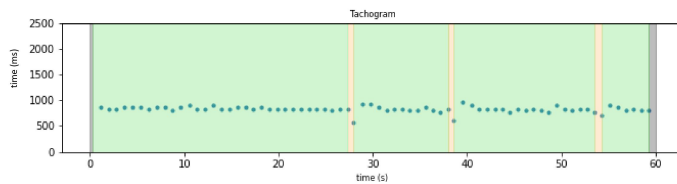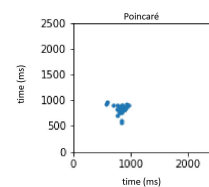

## INTERPRET-AF I\_PPG

\* 42. How would you classify the following measurement?

- ☐ Regular rhythm      ☐ One or more ectopic/missed heartbeats      ☐ Atrial flutter      ☐ Atrial fibrillation      ☐ Unreadable
- ☐ Other (please specify)

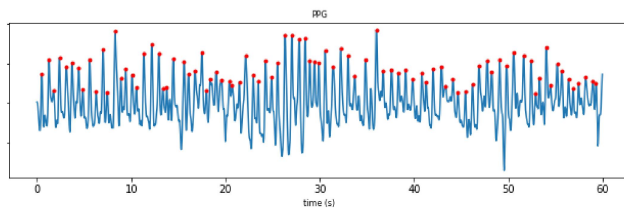

**Red dot:** potential heartbeat detected by the algorithm

## INTERPRET-AF I\_PPG

\* 43. How would you classify the following measurement?

- ☐ Regular rhythm      ☐ One or more ectopic/missed heartbeats      ☐ Atrial flutter      ☐ Atrial fibrillation      ☐ Unreadable
- ☐ Other (please specify)



**Red dot:** potential heartbeat detected by the algorithm  
**Tachogram:** time between the detected peaks (RR-interval)  
**Poincaré:** duration of each RR-interval (RR n) in function of its preceding RR-interval (RR n-1)

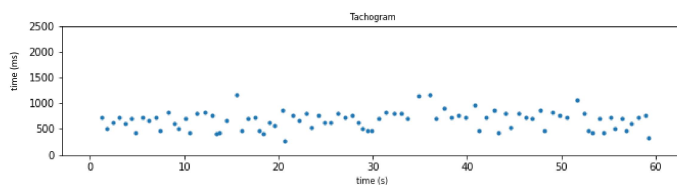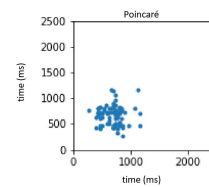

## INTERPRET-AF I\_PPG

\* 44. How would you classify the following measurement?

- ☐ Regular rhythm      ☐ One or more ectopic/missed heartbeats      ☐ Atrial flutter      ☐ Atrial fibrillation      ☐ Unreadable
- ☐ Other (please specify)

Algorithm output: urgent (89 beats per minute)

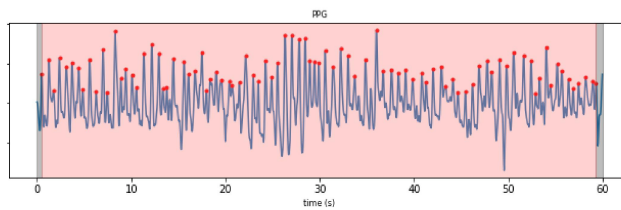

**Red dot:** potential heartbeat detected by the algorithm

**Tachogram:** time between the detected peaks (RR-interval)

**Poincaré:** duration of each RR-interval (RR n) in function of its preceding RR-interval (RR n-1)

**Green colour:** regular rhythm

**Orange colour:** one or more ectopic heartbeats

**Red colour:** atrial fibrillation

**Blue:** insufficient signal quality

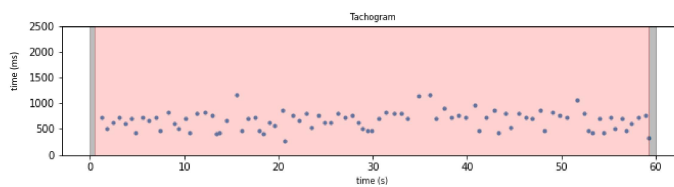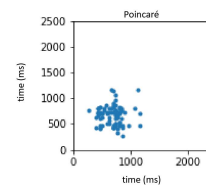



## INTERPRET-AF I\_PPG

\* 45. How would you classify the following measurement?

- ☐ Regular rhythm      ☐ One or more ectopic/missed heartbeats      ☐ Atrial flutter      ☐ Atrial fibrillation      ☐ Unreadable
- ☐ Other (please specify)

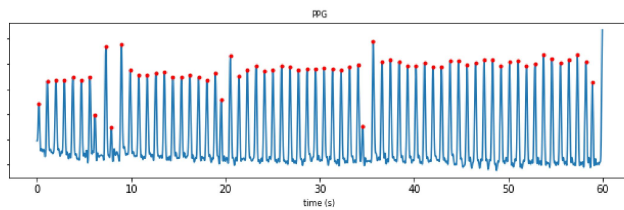

**Red dot:** potential heartbeat detected by the algorithm

## INTERPRET-AF I\_PPG

\* 46. How would you classify the following measurement?

- ☐ Regular rhythm      ☐ One or more ectopic/missed heartbeats      ☐ Atrial flutter      ☐ Atrial fibrillation      ☐ Unreadable
- ☐ Other (please specify)

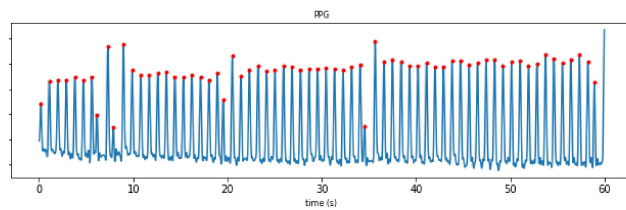

**Red dot:** potential heartbeat detected by the algorithm  
**Tachogram:** time between the detected peaks (RR-interval)  
**Poincaré:** duration of each RR-interval (RR n) in function of its preceding RR-interval (RR n-1)

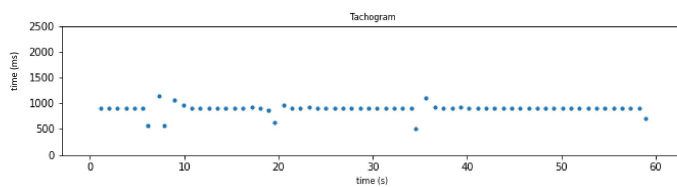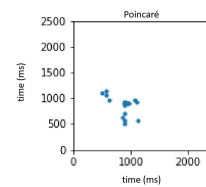

## INTERPRET-AF I\_PPG

\* 47. How would you classify the following measurement?

- ☐ Regular rhythm      ☐ One or more ectopic/missed heartbeats      ☐ Atrial flutter      ☐ Atrial fibrillation      ☐ Unreadable
- ☐ Other (please specify)

Algorithm output: warning (67 beats per minute)

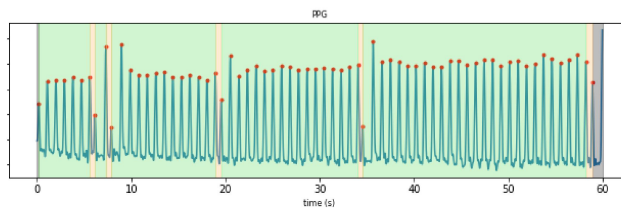

**Red dot:** potential heartbeat detected by the algorithm  
**Tachogram:** time between the detected peaks (RR-interval)  
**Poincaré:** duration of each RR-interval (RR n) in function of its preceding RR-interval (RR n-1)  
**Green colour:** regular rhythm  
**Orange colour:** one or more ectopic heartbeats  
**Red colour:** atrial fibrillation  
**Blue:** insufficient signal quality

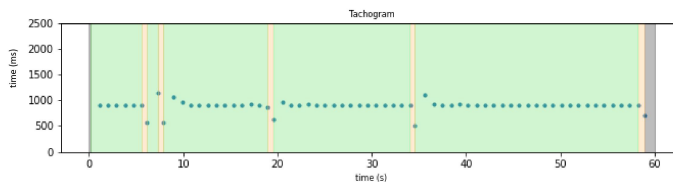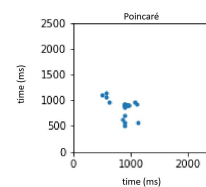

## INTERPRET-AF I\_PPG

\* 48. How would you classify the following measurement?

- ☐ Regular rhythm      ☐ One or more ectopic/missed heartbeats      ☐ Atrial flutter      ☐ Atrial fibrillation      ☐ Unreadable
- ☐ Other (please specify)

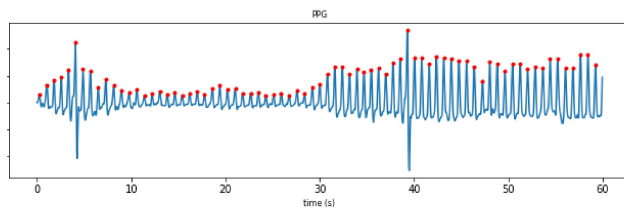

**Red dot:** potential heartbeat detected by the algorithm

## INTERPRET-AF I\_PPG

\* 49. How would you classify the following measurement?

- ☐ Regular rhythm      ☐ One or more ectopic/missed heartbeats      ☐ Atrial flutter      ☐ Atrial fibrillation      ☐ Unreadable
- ☐ Other (please specify)



**Red dot:** potential heartbeat detected by the algorithm  
**Tachogram:** time between the detected peaks (RR-interval)  
**Poincaré:** duration of each RR-interval (RR n) in function of its preceding RR-interval (RR n-1)

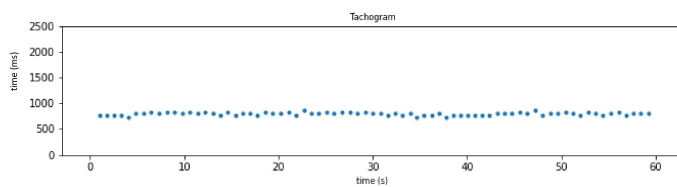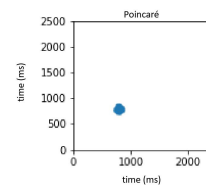

## INTERPRET-AF I\_PPG

\* 50. How would you classify the following measurement?

- ☐ Regular rhythm      ☐ One or more ectopic/missed heartbeats      ☐ Atrial flutter      ☐ Atrial fibrillation      ☐ Unreadable
- ☐ Other (please specify)

Algorithm output: normal (75 beats per minute)

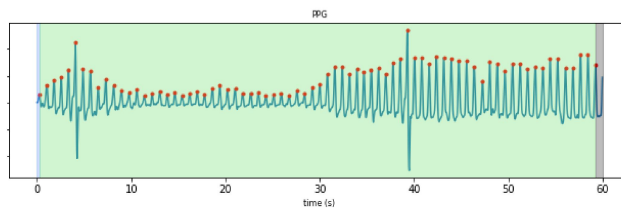

**Red dot:** potential heartbeat detected by the algorithm  
**Tachogram:** time between the detected peaks (RR-interval)  
**Poincaré:** duration of each RR-interval (RR n) in function of its preceding RR-interval (RR n-1)  
**Green colour:** regular rhythm  
**Orange colour:** one or more ectopic heartbeats  
**Red colour:** atrial fibrillation  
**Blue:** insufficient signal quality

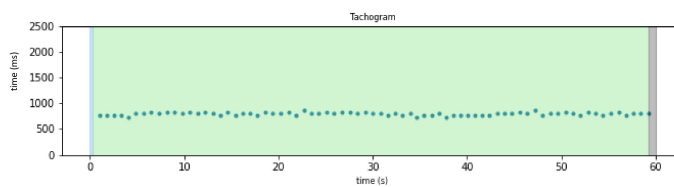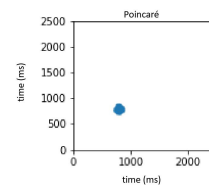

## INTERPRET-AF I\_PPG

\* 51. How would you classify the following measurement?

- ☐ Regular rhythm      ☐ One or more ectopic/missed heartbeats      ☐ Atrial flutter      ☐ Atrial fibrillation      ☐ Unreadable
- ☐ Other (please specify)

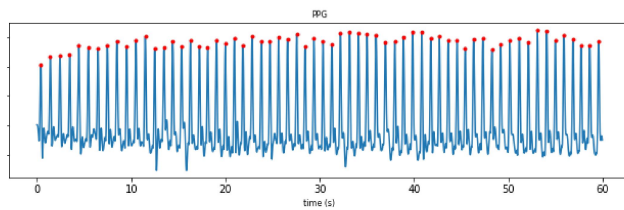

**Red dot:** potential heartbeat detected by the algorithm

## INTERPRET-AF I\_PPG

\* 52. How would you classify the following measurement?

- ☐ Regular rhythm      ☐ One or more ectopic/missed heartbeats      ☐ Atrial flutter      ☐ Atrial fibrillation      ☐ Unreadable
- ☐ Other (please specify)



**Red dot:** potential heartbeat detected by the algorithm  
**Tachogram:** time between the detected peaks (RR-interval)  
**Poincaré:** duration of each RR-interval (RR n) in function of its preceding RR-interval (RR n-1)

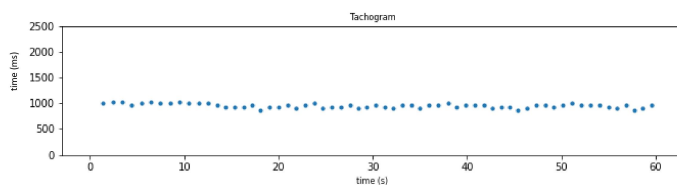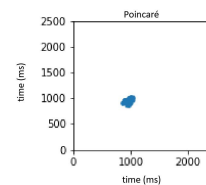



## INTERPRET-AF I\_PPG

\* 53. How would you classify the following measurement?

- ☐ Regular rhythm      ☐ One or more ectopic/missed heartbeats      ☐ Atrial flutter      ☐ Atrial fibrillation      ☐ Unreadable
- ☐ Other (please specify)

Algorithm output: normal (63 beats per minute)

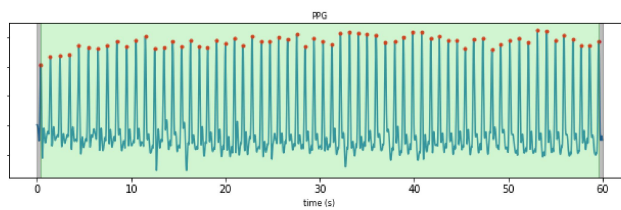

**Red dot:** potential heartbeat detected by the algorithm

**Tachogram:** time between the detected peaks (RR-interval)

**Poincaré:** duration of each RR-interval (RR n) in function of its preceding RR-interval (RR n-1)

**Green colour:** regular rhythm

**Orange colour:** one or more ectopic heartbeats

**Red colour:** atrial fibrillation

**Blue:** insufficient signal quality

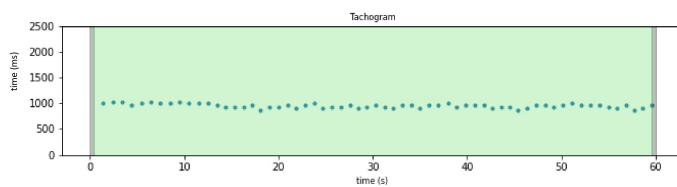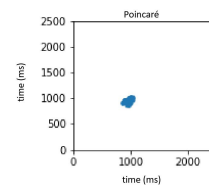

Supplement: Data_Sheet_3.PDF [file Data_Sheet_3.PDF]
