# Supplementary material for: Accuracy of Physicians Interpreting Photoplethysmography and Electrocardiography Tracings to Detect Atrial Fibrillation: INTERPRET-AF
Source: Frontiers journal article supplement (doi:10.3389/fcvm.2021.734737), 2021-09-20

## INTERPRET-AF I\_PPG

\* 54. How would you classify the following measurement?

- ☐ Regular rhythm      ☐ One or more ectopic/missed heartbeats      ☐ Atrial flutter      ☐ Atrial fibrillation      ☐ Unreadable
- ☐ Other (please specify)

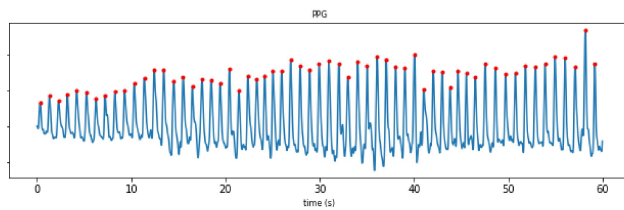

**Red dot:** potential heartbeat detected by the algorithm

## INTERPRET-AF I\_PPG

\* 55. How would you classify the following measurement?

- ☐ Regular rhythm      ☐ One or more ectopic/missed heartbeats      ☐ Atrial flutter      ☐ Atrial fibrillation      ☐ Unreadable
- ☐ Other (please specify)

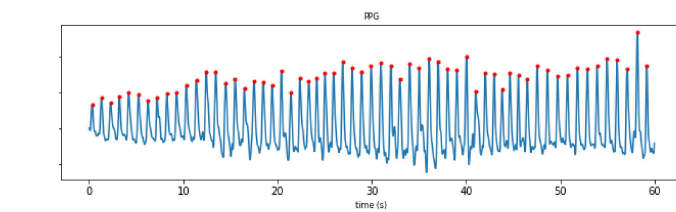

**Red dot:** potential heartbeat detected by the algorithm  
**Tachogram:** time between the detected peaks (RR-interval)  
**Poincaré:** duration of each RR-interval (RR n) in function of its preceding RR-interval (RR n-1)

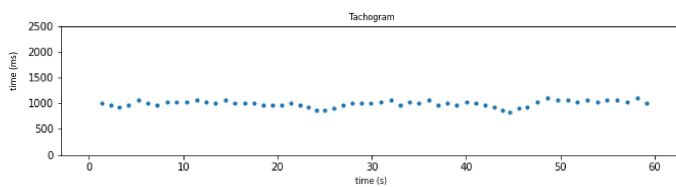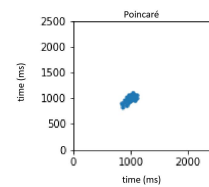

## INTERPRET-AF I\_PPG

\* 56. How would you classify the following measurement?

- ☐ Regular rhythm      ☐ One or more ectopic/missed heartbeats      ☐ Atrial flutter      ☐ Atrial fibrillation      ☐ Unreadable
- ☐ Other (please specify)

Algorithm output: normal (93 beats per minute)

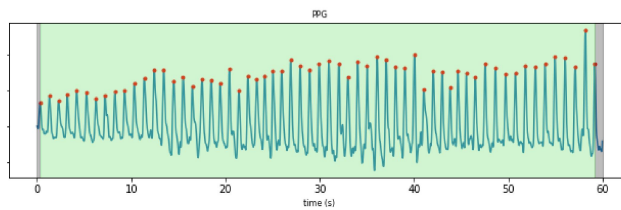

**Red dot:** potential heartbeat detected by the algorithm  
**Tachogram:** time between the detected peaks (RR-interval)  
**Poincaré:** duration of each RR-interval (RR n) in function of its preceding RR-interval (RR n-1)  
**Green colour:** regular rhythm  
**Orange colour:** one or more ectopic heartbeats  
**Red colour:** atrial fibrillation  
**Blue:** insufficient signal quality

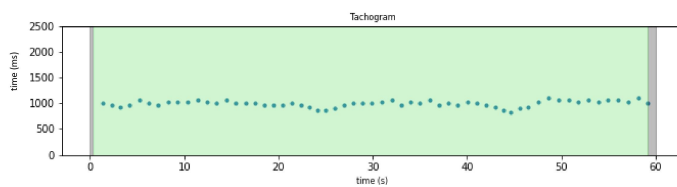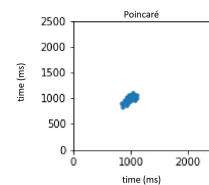

## INTERPRET-AF I\_PPG

\* 57. How would you classify the following measurement?

- ☐ Regular rhythm      ☐ One or more ectopic/missed heartbeats      ☐ Atrial flutter      ☐ Atrial fibrillation      ☐ Unreadable
- ☐ Other (please specify)

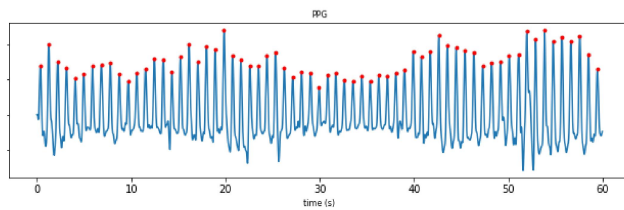

**Red dot:** potential heartbeat detected by the algorithm



## INTERPRET-AF I\_PPG

\* 58. How would you classify the following measurement?

- ☐ Regular rhythm      ☐ One or more ectopic/missed heartbeats      ☐ Atrial flutter      ☐ Atrial fibrillation      ☐ Unreadable
- ☐ Other (please specify)



**Red dot:** potential heartbeat detected by the algorithm  
**Tachogram:** time between the detected peaks (RR-interval)  
**Poincaré:** duration of each RR-interval (RR n) in function of its preceding RR-interval (RR n-1)

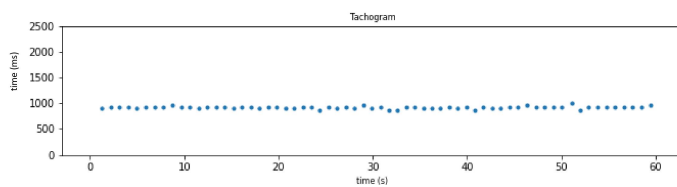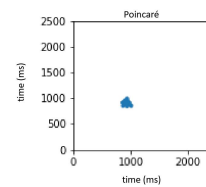

## INTERPRET-AF I\_PPG

\* 59. How would you classify the following measurement?

- ☐ Regular rhythm      ☐ One or more ectopic/missed heartbeats      ☐ Atrial flutter      ☐ Atrial fibrillation      ☐ Unreadable
- ☐ Other (please specify)

Algorithm output: normal (77 beats per minute)

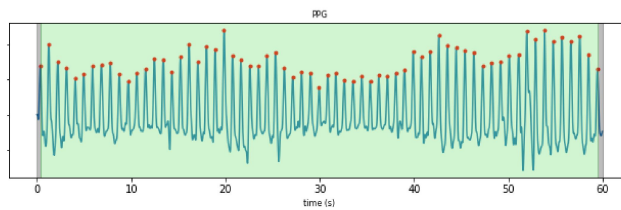

**Red dot:** potential heartbeat detected by the algorithm  
**Tachogram:** time between the detected peaks (RR-interval)  
**Poincaré:** duration of each RR-interval (RR n) in function of its preceding RR-interval (RR n-1)  
**Green colour:** regular rhythm  
**Orange colour:** one or more ectopic heartbeats  
**Red colour:** atrial fibrillation  
**Blue:** insufficient signal quality

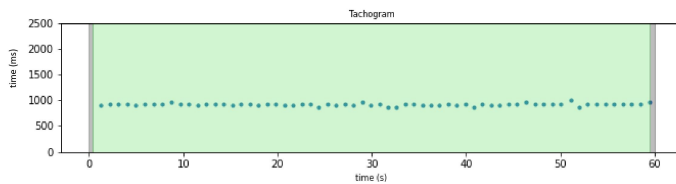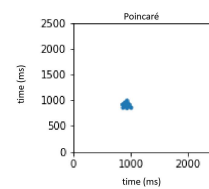

## INTERPRET-AF I\_PPG

\* 60. How would you classify the following measurement?

- ☐ Regular rhythm      ☐ One or more ectopic/missed heartbeats      ☐ Atrial flutter      ☐ Atrial fibrillation      ☐ Unreadable
- ☐ Other (please specify)

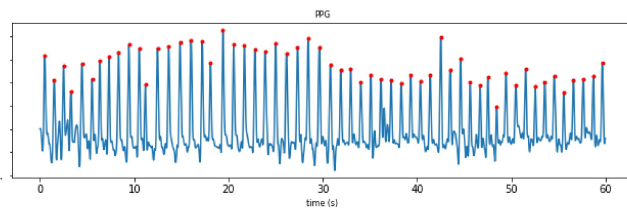

**Red dot:** potential heartbeat detected by the algorithm

## INTERPRET-AF I\_PPG

\* 61. How would you classify the following measurement?

- ☐ Regular rhythm      ☐ One or more ectopic/missed heartbeats      ☐ Atrial flutter      ☐ Atrial fibrillation      ☐ Unreadable
- ☐ Other (please specify)

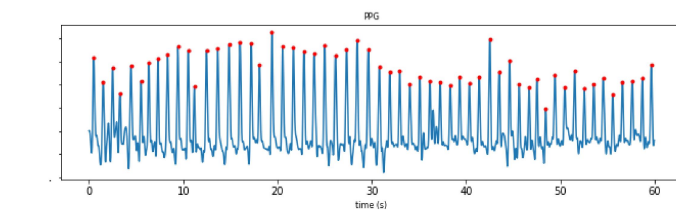

**Red dot:** potential heartbeat detected by the algorithm  
**Tachogram:** time between the detected peaks (RR-interval)  
**Poincaré:** duration of each RR-interval (RR n) in function of its preceding RR-interval (RR n-1)

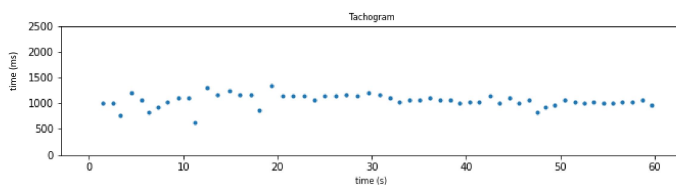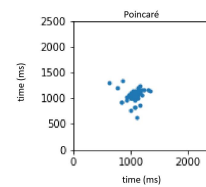

## INTERPRET-AF I\_PPG

\* 62. How would you classify the following measurement?

- ☐ Regular rhythm      ☐ One or more ectopic/missed heartbeats      ☐ Atrial flutter      ☐ Atrial fibrillation      ☐ Unreadable
- ☐ Other (please specify)

Algorithm output: warning (57 beats per minute)

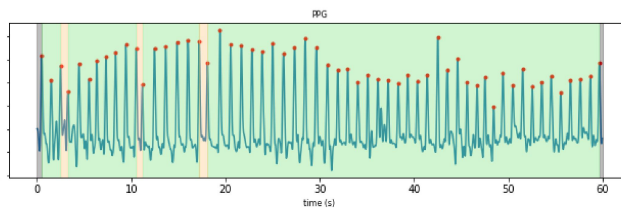

**Red dot:** potential heartbeat detected by the algorithm  
**Tachogram:** time between the detected peaks (RR-interval)  
**Poincaré:** duration of each RR-interval (RR n) in function of its preceding RR-interval (RR n-1)  
**Green colour:** regular rhythm  
**Orange colour:** one or more ectopic heartbeats  
**Red colour:** atrial fibrillation  
**Blue:** insufficient signal quality

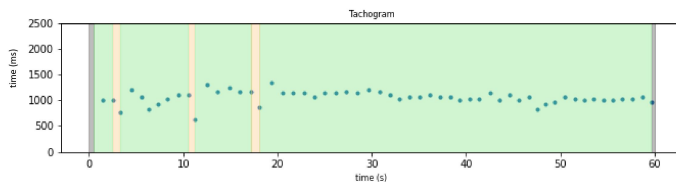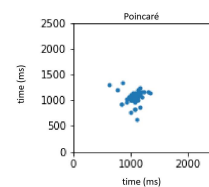

## INTERPRET-AF I\_PPG

\* 63. How would you classify the following measurement?

- ☐ Regular rhythm      ☐ One or more ectopic/missed heartbeats      ☐ Atrial flutter      ☐ Atrial fibrillation      ☐ Unreadable
- ☐ Other (please specify)

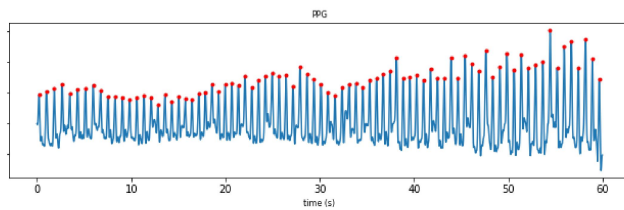

**Red dot:** potential heartbeat detected by the algorithm

## INTERPRET-AF I\_PPG

\* 64. How would you classify the following measurement?

- ☐ Regular rhythm      ☐ One or more ectopic heartbeats      ☐ Atrial flutter      ☐ Atrial fibrillation      ☐ Unreadable
- ☐ Other (please specify)

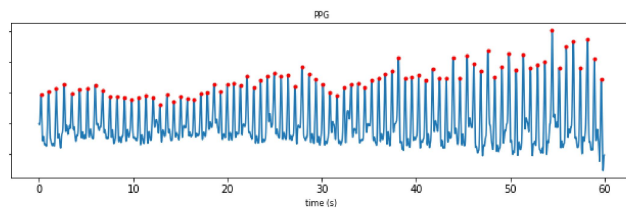

**Red dot:** potential heartbeat detected by the algorithm  
**Tachogram:** time between the detected peaks (RR-interval)  
**Poincaré:** duration of each RR-interval (RR n) in function of its preceding RR-interval (RR n-1)

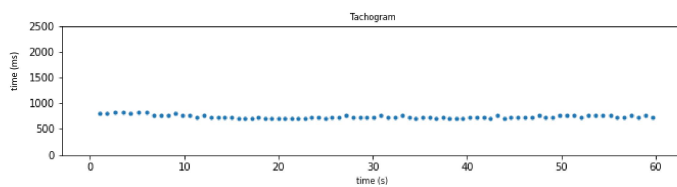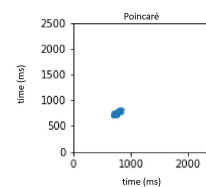

## INTERPRET-AF I\_PPG

\* 65. How would you classify the following measurement?

- ☐ Regular rhythm      ☐ One or more ectopic/missed heartbeats      ☐ Atrial flutter      ☐ Atrial fibrillation      ☐ Unreadable
- ☐ Other (please specify)

Algorithm output: normal (81 beats per minute)

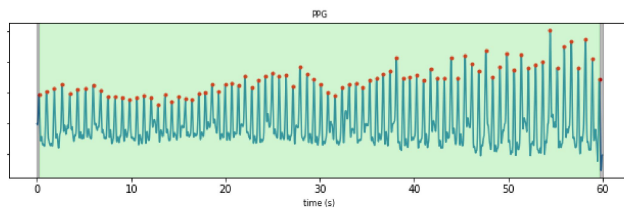

**Red dot:** potential heartbeat detected by the algorithm  
**Tachogram:** time between the detected peaks (RR-interval)  
**Poincaré:** duration of each RR-interval (RR n) in function of its preceding RR-interval (RR n-1)  
**Green colour:** regular rhythm  
**Orange colour:** one or more ectopic heartbeats  
**Red colour:** atrial fibrillation  
**Blue:** insufficient signal quality

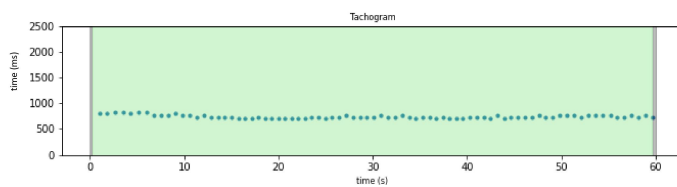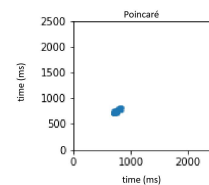



## INTERPRET-AF I\_PPG

\* 66. How would you classify the following measurement?

- ☐ Regular rhythm      ☐ One or more ectopic/missed heartbeats      ☐ Atrial flutter      ☐ Atrial fibrillation      ☐ Unreadable
- ☐ Other (please specify)

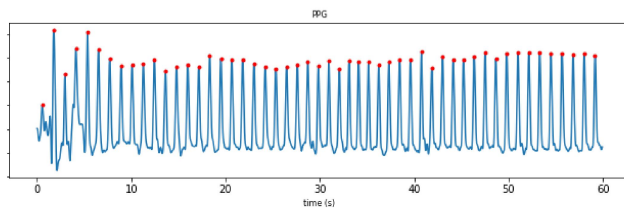

**Red dot:** potential heartbeat detected by the algorithm

## INTERPRET-AF I\_PPG

\* 67. How would you classify the following measurement?

- ☐ Regular rhythm      ☐ One or more ectopic/missed heartbeats      ☐ Atrial flutter      ☐ Atrial fibrillation      ☐ Unreadable
- ☐ Other (please specify)

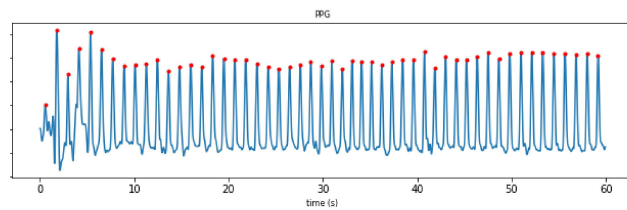

**Red dot:** potential heartbeat detected by the algorithm  
**Tachogram:** time between the detected peaks (RR-interval)  
**Poincaré:** duration of each RR-interval (RR n) in function of its preceding RR-interval (RR n-1)

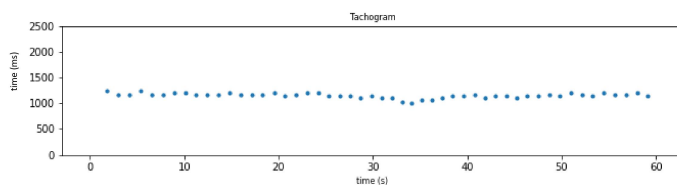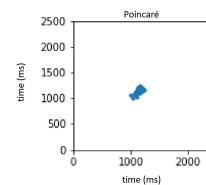

## INTERPRET-AF I\_PPG

\* 68. How would you classify the following measurement?

- ☐ Regular rhythm      ☐ One or more ectopic/missed heartbeats      ☐ Atrial flutter      ☐ Atrial fibrillation      ☐ Unreadable
- ☐ Other (please specify)

Algorithm output: normal (52 beats per minute)

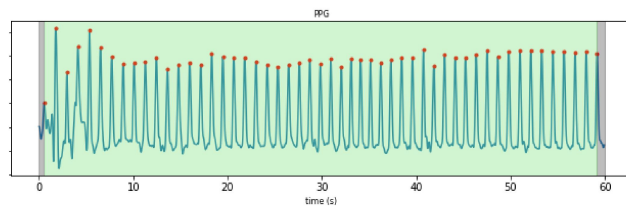

**Red dot:** potential heartbeat detected by the algorithm  
**Tachogram:** time between the detected peaks (RR-interval)  
**Poincaré:** duration of each RR-interval (RR n) in function of its preceding RR-interval (RR n-1)  
**Green colour:** regular rhythm  
**Orange colour:** one or more ectopic heartbeats  
**Red colour:** atrial fibrillation  
**Blue:** insufficient signal quality

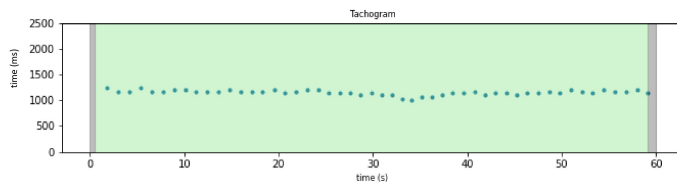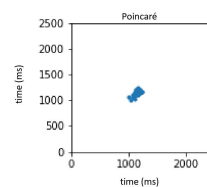

## INTERPRET-AF I\_PPG

\* 69. How would you classify the following measurement?

- ☐ Regular rhythm      ☐ One or more ectopic/missed heartbeats      ☐ Atrial flutter      ☐ Atrial fibrillation      ☐ Unreadable
- ☐ Other (please specify)

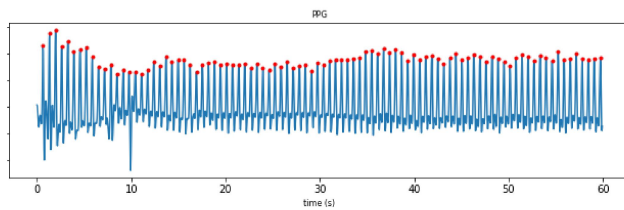

**Red dot:** potential heartbeat detected by the algorithm

## INTERPRET-AF I\_PPG

\* 70. How would you classify the following measurement?

- ☐ Regular rhythm      ☐ One or more ectopic/missed heartbeats      ☐ Atrial flutter      ☐ Atrial fibrillation      ☐ Unreadable
- ☐ Other (please specify)

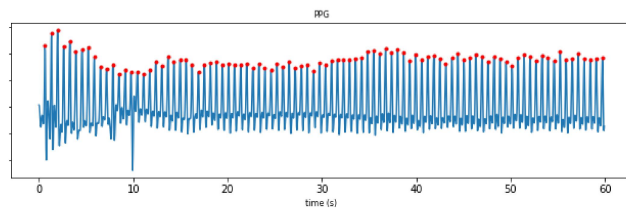

**Red dot:** potential heartbeat detected by the algorithm  
**Tachogram:** time between the detected peaks (RR-interval)  
**Poincaré:** duration of each RR-interval (RR n) in function of its preceding RR-interval (RR n-1)

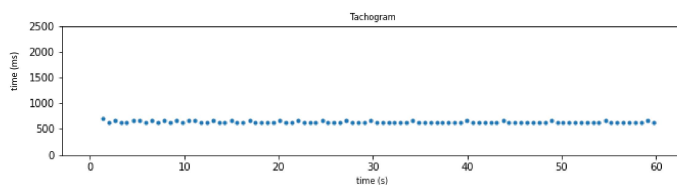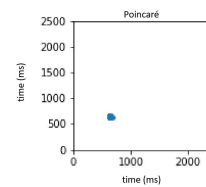

## INTERPRET-AF I\_PPG

\* 71. How would you classify the following measurement?

- ☐ Regular rhythm      ☐ One or more ectopic/missed heartbeats      ☐ Atrial flutter      ☐ Atrial fibrillation      ☐ Unreadable
- ☐ Other (please specify)

Algorithm output: normal (93 beats per minute)

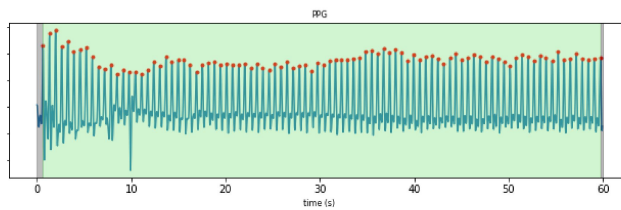

**Red dot:** potential heartbeat detected by the algorithm  
**Tachogram:** time between the detected peaks (RR-interval)  
**Poincaré:** duration of each RR-interval (RR n) in function of its preceding RR-interval (RR n-1)  
**Green colour:** regular rhythm  
**Orange colour:** one or more ectopic heartbeats  
**Red colour:** atrial fibrillation  
**Blue:** insufficient signal quality

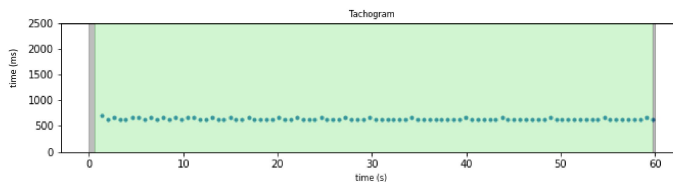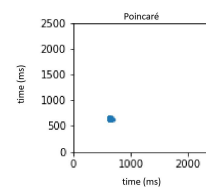

## INTERPRET-AF I\_PPG

\* 72. How would you classify the following measurement?

- ☐ Regular rhythm      ☐ One or more ectopic/missed heartbeats      ☐ Atrial flutter      ☐ Atrial fibrillation      ☐ Unreadable
- ☐ Other (please specify)

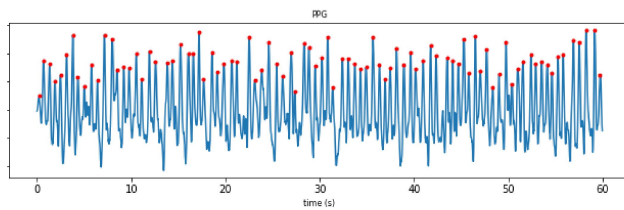

**Red dot:** potential heartbeat detected by the algorithm

## INTERPRET-AF I\_PPG

\* 73. How would you classify the following measurement?

- ☐ Regular rhythm      ☐ One or more ectopic/missed heartbeats      ☐ Atrial flutter      ☐ Atrial fibrillation      ☐ Unreadable
- ☐ Other (please specify)



**Red dot:** potential heartbeat detected by the algorithm  
**Tachogram:** time between the detected peaks (RR-interval)  
**Poincaré:** duration of each RR-interval (RR n) in function of its preceding RR-interval (RR n-1)

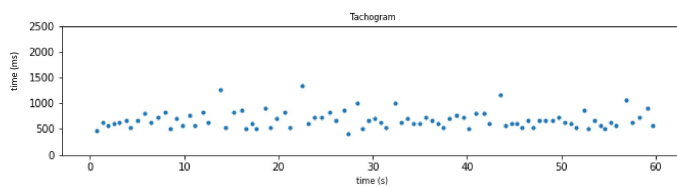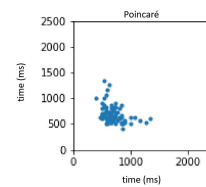



## INTERPRET-AF I\_PPG

\* 74. How would you classify the following measurement?

- ☐ Regular rhythm      ☐ One or more ectopic/missed heartbeats      ☐ Atrial flutter      ☐ Atrial fibrillation      ☐ Unreadable
- ☐ Other (please specify)

Algorithm output: urgent (88 beats per minute)

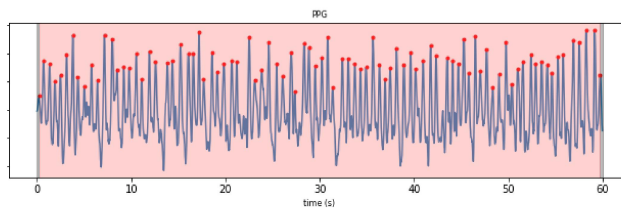

**Red dot:** potential heartbeat detected by the algorithm  
**Tachogram:** time between the detected peaks (RR-interval)  
**Poincaré:** duration of each RR-interval (RR n) in function of its preceding RR-interval (RR n-1)  
**Green colour:** regular rhythm  
**Orange colour:** one or more ectopic heartbeats  
**Red colour:** atrial fibrillation  
**Blue:** insufficient signal quality

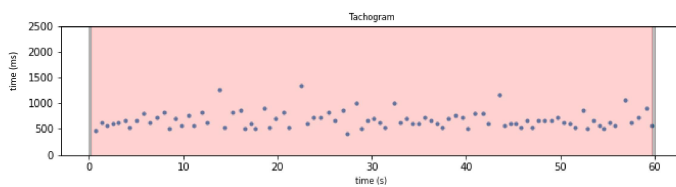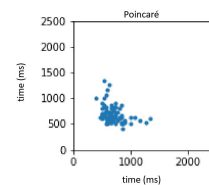

## INTERPRET-AF I\_PPG

\* 75. How would you classify the following measurement?

- ☐ Regular rhythm      ☐ One or more ectopic/missed heartbeats      ☐ Atrial flutter      ☐ Atrial fibrillation      ☐ Unreadable
- ☐ Other (please specify)

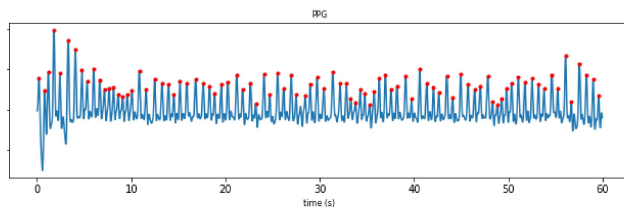

**Red dot:** potential heartbeat detected by the algorithm

## INTERPRET-AF I\_PPG

\* 76. How would you classify the following measurement?

- ☐ Regular rhythm      ☐ One or more ectopic/missed heartbeats      ☐ Atrial flutter      ☐ Atrial fibrillation      ☐ Unreadable
- ☐ Other (please specify)

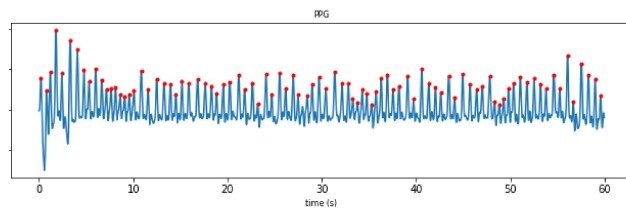

**Red dot:** potential heartbeat detected by the algorithm  
**Tachogram:** time between the detected peaks (RR-interval)  
**Poincaré:** duration of each RR-interval (RR n) in function of its preceding RR-interval (RR n-1)

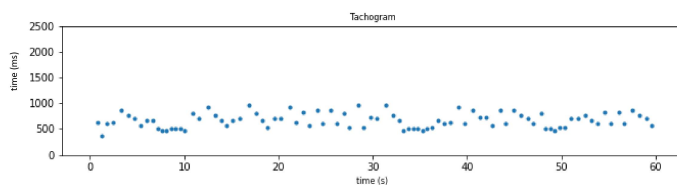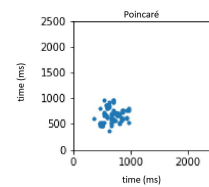

## INTERPRET-AF I\_PPG

\* 77. How would you classify the following measurement?

- ☐ Regular rhythm      ☐ One or more ectopic/missed heartbeats      ☐ Atrial flutter      ☐ Atrial fibrillation      ☐ Unreadable
- ☐ Other (please specify)

Algorithm output: urgent (90 beats per minute)

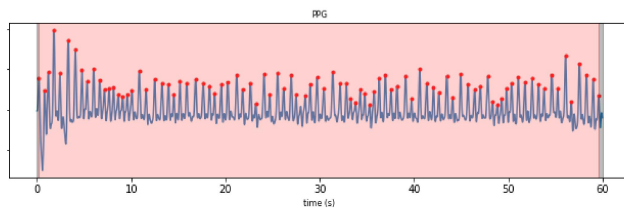

**Red dot:** potential heartbeat detected by the algorithm  
**Tachogram:** time between the detected peaks (RR-interval)  
**Poincaré:** duration of each RR-interval (RR n) in function of its preceding RR-interval (RR n-1)  
**Green colour:** regular rhythm  
**Orange colour:** one or more ectopic heartbeats  
**Red colour:** atrial fibrillation  
**Blue:** insufficient signal quality

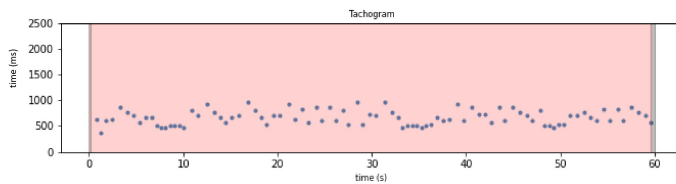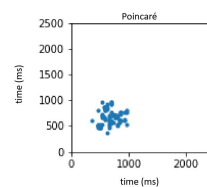

## INTERPRET-AF I\_PPG

\* 78. How would you classify the following measurement?

- ☐ Regular rhythm      ☐ One or more ectopic/missed heartbeats      ☐ Atrial flutter      ☐ Atrial fibrillation      ☐ Unreadable
- ☐ Other (please specify)

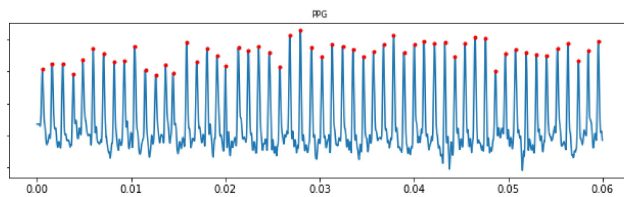

**Red dot:** potential heartbeat detected by the algorithm

## INTERPRET-AF I\_PPG

\* 79. How would you classify the following measurement?

- ☐ Regular rhythm      ☐ One or more ectopic/missed heartbeats      ☐ Atrial flutter      ☐ Atrial fibrillation      ☐ Unreadable
- ☐ Other (please specify)

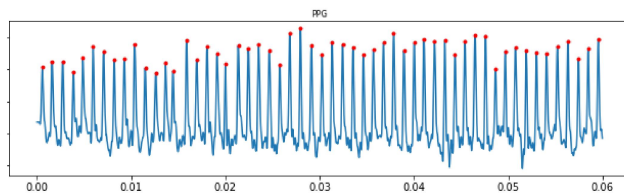

**Red dot:** potential heartbeat detected by the algorithm  
**Tachogram:** time between the detected peaks (RR-interval)  
**Poincaré:** duration of each RR-interval (RR n) in function of its preceding RR-interval (RR n-1)

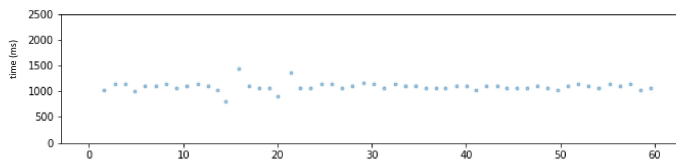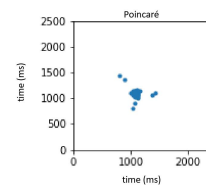

## INTERPRET-AF I\_PPG

\* 80. How would you classify the following measurement?

- ☐ Regular rhythm      ☐ One or more ectopic/missed heartbeats      ☐ Atrial flutter      ☐ Atrial fibrillation      ☐ Unreadable
- ☐ Other (please specify)

Algorithm output: normal (55 beats per minute)

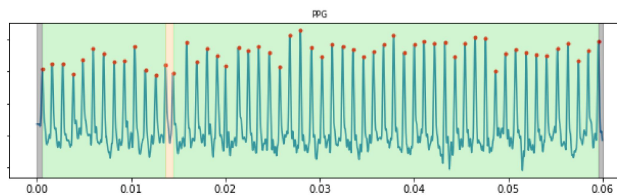

**Red dot:** potential heartbeat detected by the algorithm

**Tachogram:** time between the detected peaks (RR-interval)

**Poincaré:** duration of each RR-interval (RR n) in function of its preceding RR-interval (RR n-1)

**Green colour:** regular rhythm

**Orange colour:** one or more ectopic heartbeats

**Red colour:** atrial fibrillation

**Blue:** insufficient signal quality

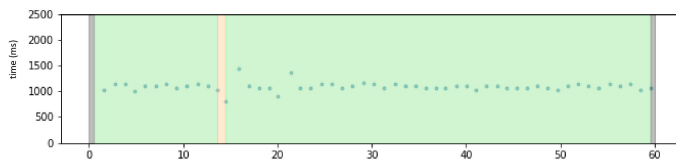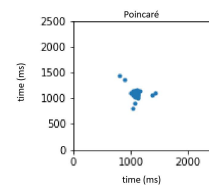

## INTERPRET-AF I\_PPG

\* 81. How would you classify the following measurement?

- ☐ Regular rhythm      ☐ One or more ectopic/missed heartbeats      ☐ Atrial flutter      ☐ Atrial fibrillation      ☐ Unreadable
- ☐ Other (please specify)

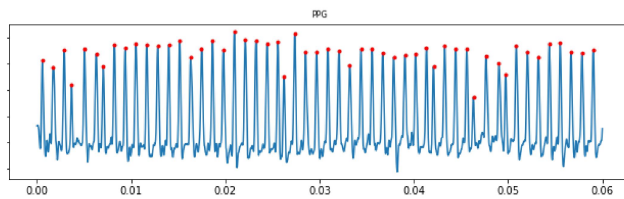

**Red dot:** potential heartbeat detected by the algorithm



## INTERPRET-AF I\_PPG

\* 82. How would you classify the following measurement?

- ☐ Regular rhythm      ☐ One or more ectopic/missed heartbeats      ☐ Atrial flutter      ☐ Atrial fibrillation      ☐ Unreadable
- ☐ Other (please specify)

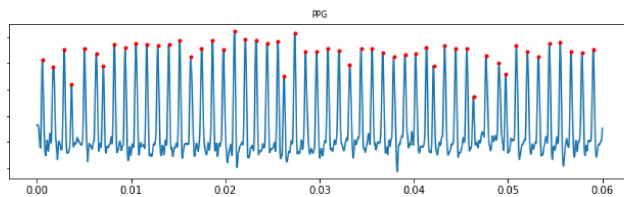

**Red dot:** potential heartbeat detected by the algorithm  
**Tachogram:** time between the detected peaks (RR-interval)  
**Poincaré:** duration of each RR-interval (RR n) in function of its preceding RR-interval (RR n-1)

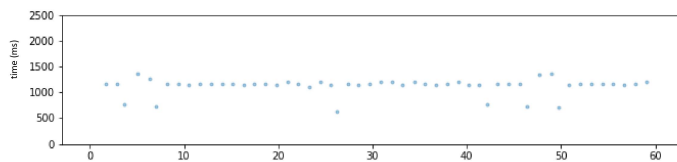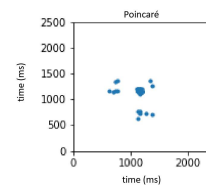

## INTERPRET-AF I\_PPG

\* 83. How would you classify the following measurement?

- ☐ Regular rhythm      ☐ One or more ectopic/missed heartbeats      ☐ Atrial flutter      ☐ Atrial fibrillation      ☐ Unreadable
- ☐ Other (please specify)

Algorithm output: warning (53 beats per minute)

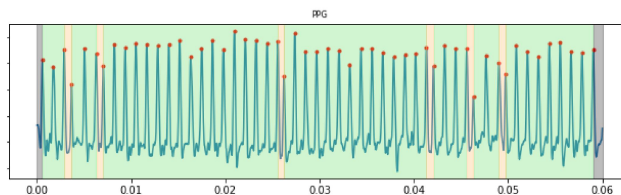

**Red dot:** potential heartbeat detected by the algorithm  
**Tachogram:** time between the detected peaks (RR-interval)  
**Poincaré:** duration of each RR-interval (RR n) in function of its preceding RR-interval (RR n-1)  
**Green colour:** regular rhythm  
**Orange colour:** one or more ectopic heartbeats  
**Red colour:** atrial fibrillation  
**Blue:** insufficient signal quality

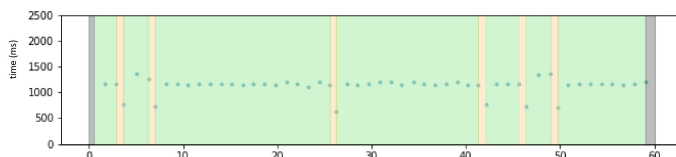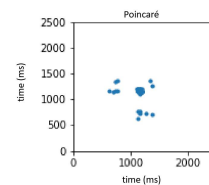

## INTERPRET-AF I\_PPG

\* 84. How would you classify the following measurement?

- ☐ Regular rhythm      ☐ One or more ectopic/missed heartbeats      ☐ Atrial flutter      ☐ Atrial fibrillation      ☐ Unreadable
- ☐ Other (please specify)

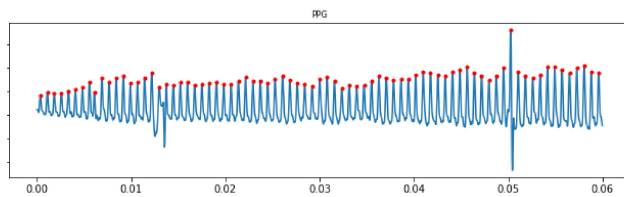

**Red dot:** potential heartbeat detected by the algorithm

## INTERPRET-AF I\_PPG

\* 85. How would you classify the following measurement?

- ☐ Regular rhythm      ☐ One or more ectopic/missed heartbeats      ☐ Atrial flutter      ☐ Atrial fibrillation      ☐ Unreadable
- ☐ Other (please specify)

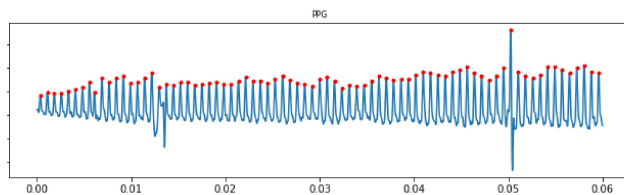

**Red dot:** potential heartbeat detected by the algorithm  
**Tachogram:** time between the detected peaks (RR-interval)  
**Poincaré:** duration of each RR-interval (RR n) in function of its preceding RR-interval (RR n-1)

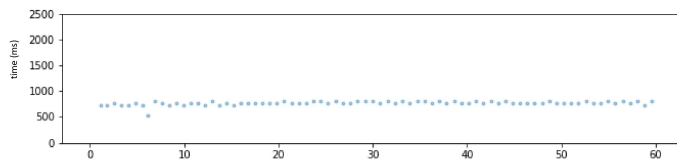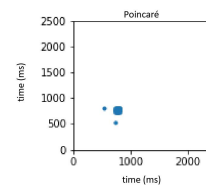

## INTERPRET-AF I\_PPG

\* 86. How would you classify the following measurement?

- ☐ Regular rhythm      ☐ One or more ectopic/missed heartbeats      ☐ Atrial flutter      ☐ Atrial fibrillation      ☐ Unreadable
- ☐ Other (please specify)

Algorithm output: normal (78 beats per minute)

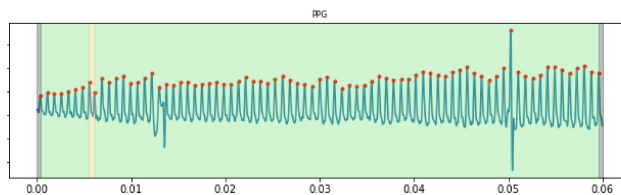

**Red dot:** potential heartbeat detected by the algorithm  
**Tachogram:** time between the detected peaks (RR-interval)  
**Poincaré:** duration of each RR-interval (RR n) in function of its preceding RR-interval (RR n-1)  
**Green colour:** regular rhythm  
**Orange colour:** one or more ectopic heartbeats  
**Red colour:** atrial fibrillation  
**Blue:** insufficient signal quality

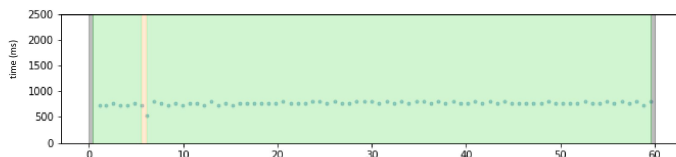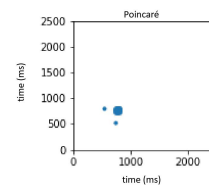

## INTERPRET-AF I\_PPG

\* 87. How would you classify the following measurement?

- ☐ Regular rhythm      ☐ One or more ectopic/missed heartbeats      ☐ Atrial flutter      ☐ Atrial fibrillation      ☐ Unreadable
- ☐ Other (please specify)

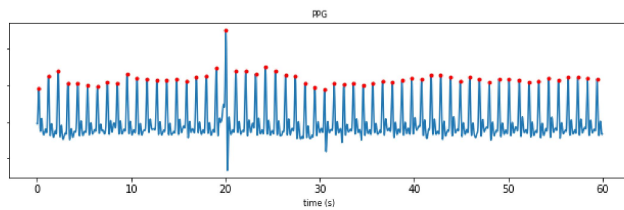

**Red dot:** potential heartbeat detected by the algorithm

## INTERPRET-AF I\_PPG

\* 88. How would you classify the following measurement?

- ☐ Regular rhythm      ☐ One or more ectopic/missed heartbeats      ☐ Atrial flutter      ☐ Atrial fibrillation      ☐ Unreadable
- ☐ Other (please specify)



**Red dot:** potential heartbeat detected by the algorithm  
**Tachogram:** time between the detected peaks (RR-interval)  
**Poincaré:** duration of each RR-interval (RR n) in function of its preceding RR-interval (RR n-1)

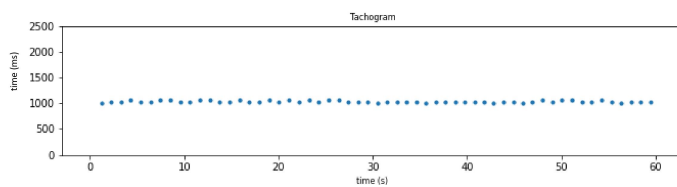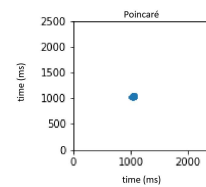

## INTERPRET-AF I\_PPG

\* 89. How would you classify the following measurement?

- ☐ Regular rhythm      ☐ One or more ectopic/missed heartbeats      ☐ Atrial flutter      ☐ Atrial fibrillation      ☐ Unreadable
- ☐ Other (please specify)

Algorithm output: normal (58 beats per minute)

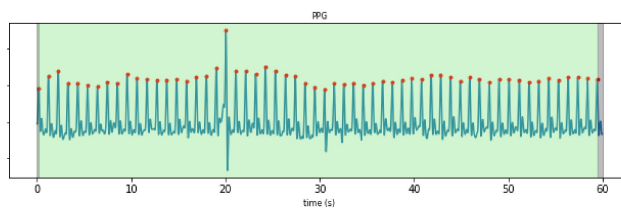

**Red dot:** potential heartbeat detected by the algorithm  
**Tachogram:** time between the detected peaks (RR-interval)  
**Poincaré:** duration of each RR-interval (RR n) in function of its preceding RR-interval (RR n-1)  
**Green colour:** regular rhythm  
**Orange colour:** one or more ectopic heartbeats  
**Red colour:** atrial fibrillation  
**Blue:** insufficient signal quality

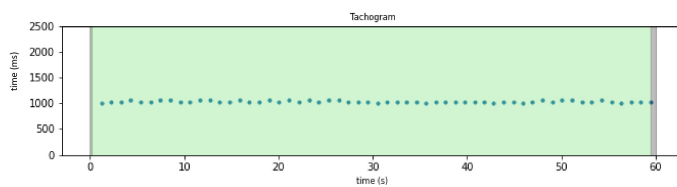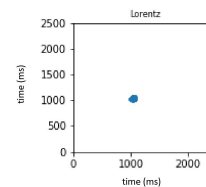



## INTERPRET-AF I\_PPG

\* 90. How would you classify the following measurement?

- ☐ Regular rhythm      ☐ One or more ectopic/missed heartbeats      ☐ Atrial flutter      ☐ Atrial fibrillation      ☐ Unreadable
- ☐ Other (please specify)

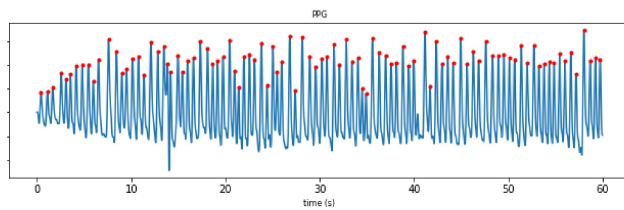

**Red dot:** potential heartbeat detected by the algorithm

## INTERPRET-AF I\_PPG

\* 91. How would you classify the following measurement?

- ☐ Regular rhythm      ☐ One or more ectopic/missed heartbeats      ☐ Atrial flutter      ☐ Atrial fibrillation      ☐ Unreadable
- ☐ Other (please specify)



**Red dot:** potential heartbeat detected by the algorithm  
**Tachogram:** time between the detected peaks (RR-interval)  
**Poincaré:** duration of each RR-interval (RR n) in function of its preceding RR-interval (RR n-1)

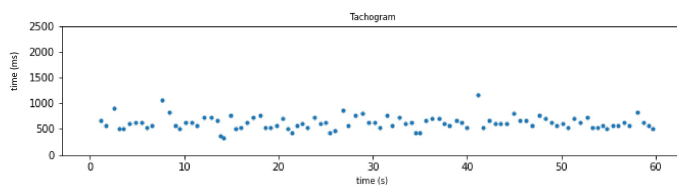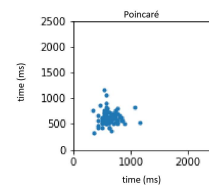

## INTERPRET-AF I\_PPG

\* 92. How would you classify the following measurement?

- ☐ Regular rhythm      ☐ One or more ectopic/missed heartbeats      ☐ Atrial flutter      ☐ Atrial fibrillation      ☐ Unreadable
- ☐ Other (please specify)

Algorithm output: urgent (96 beats per minute)

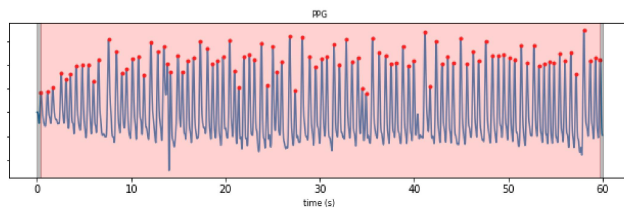

**Red dot:** potential heartbeat detected by the algorithm

**Tachogram:** time between the detected peaks (RR-interval)

**Poincaré:** duration of each RR-interval (RR n) in function of its preceding RR-interval (RR n-1)

**Green colour:** regular rhythm

**Orange colour:** one or more ectopic heartbeats

**Red colour:** atrial fibrillation

**Blue:** insufficient signal quality

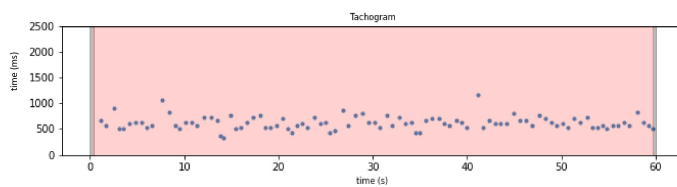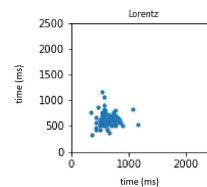

## INTERPRET-AF I\_PPG

\* 93. How would you classify the following measurement?

- ☐ Regular rhythm      ☐ One or more ectopic/missed heartbeats      ☐ Atrial flutter      ☐ Atrial fibrillation      ☐ Unreadable
- ☐ Other (please specify)

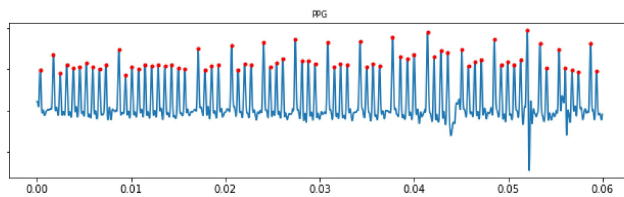

**Red dot:** potential heartbeat detected by the algorithm

## INTERPRET-AF I\_PPG

\* 94. How would you classify the following measurement?

- ☐ Regular rhythm      ☐ One or more ectopic/missed heartbeats      ☐ Atrial flutter      ☐ Atrial fibrillation      ☐ Unreadable
- ☐ Other (please specify)

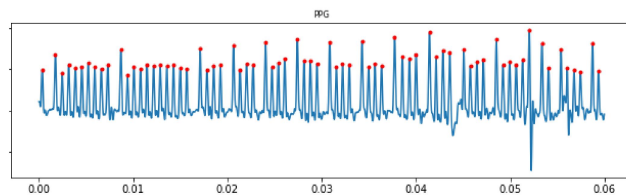

**Red dot:** potential heartbeat detected by the algorithm  
**Tachogram:** time between the detected peaks (RR-interval)  
**Poincaré:** duration of each RR-interval (RR n) in function of its preceding RR-interval (RR n-1)

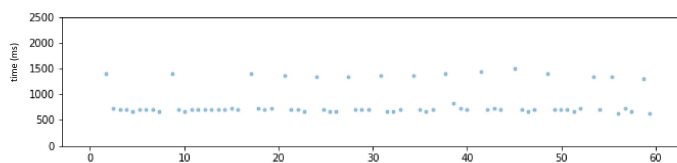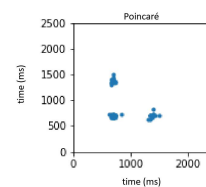

## INTERPRET-AF I\_PPG

\* 95. How would you classify the following measurement?

- ☐ Regular rhythm      ☐ One or more ectopic/missed heartbeats      ☐ Atrial flutter      ☐ Atrial fibrillation      ☐ Unreadable
- ☐ Other (please specify)

Algorithm output: warning (71 beats per minute)

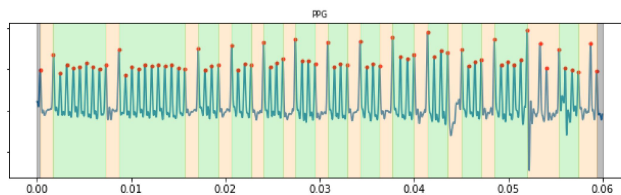

**Red dot:** potential heartbeat detected by the algorithm  
**Tachogram:** time between the detected peaks (RR-interval)  
**Poincaré:** duration of each RR-interval (RR n) in function of its preceding RR-interval (RR n-1)  
**Green colour:** regular rhythm  
**Orange colour:** one or more ectopic heartbeats  
**Red colour:** atrial fibrillation  
**Blue:** insufficient signal quality

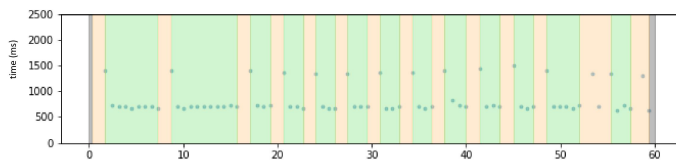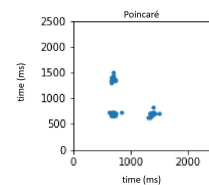

## INTERPRET-AF I\_PPG

\* 96. How would you classify the following measurement?

- ☐ Regular rhythm      ☐ One or more ectopic/missed heartbeats      ☐ Atrial flutter      ☐ Atrial fibrillation      ☐ Unreadable
- ☐ Other (please specify)

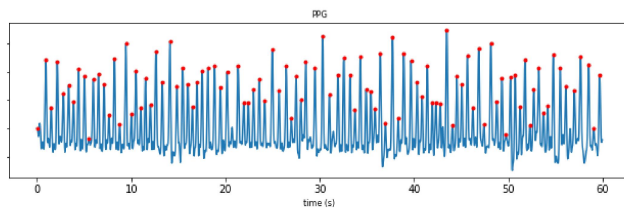

**Red dot:** potential heartbeat detected by the algorithm

## INTERPRET-AF I\_PPG

\* 97. How would you classify the following measurement?

- ☐ Regular rhythm      ☐ One or more ectopic/missed heartbeats      ☐ Atrial flutter      ☐ Atrial fibrillation      ☐ Unreadable
- ☐ Other (please specify)



**Red dot:** potential heartbeat detected by the algorithm

**Tachogram:** time between the detected peaks (RR-interval)

**Poincaré:** duration of each RR-interval (RR n) in function of its preceding RR-interval (RR n-1)

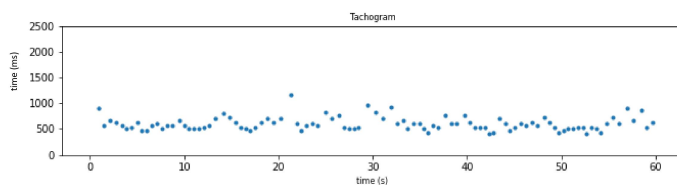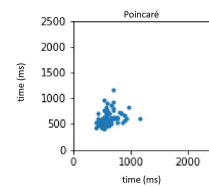



## INTERPRET-AF I\_PPG

\* 98. How would you classify the following measurement?

- ☐ Regular rhythm      ☐ One or more ectopic/missed heartbeats      ☐ Atrial flutter      ☐ Atrial fibrillation      ☐ Unreadable
- ☐ Other (please specify)

Algorithm output: urgent (100 beats per minute)

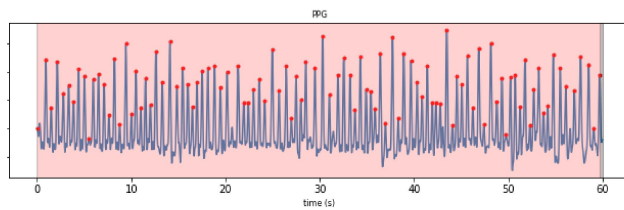

**Red dot:** potential heartbeat detected by the algorithm  
**Tachogram:** time between the detected peaks (RR-interval)  
**Poincaré:** duration of each RR-interval (RR n) in function of its preceding RR-interval (RR n-1)  
**Green colour:** regular rhythm  
**Orange colour:** one or more ectopic heartbeats  
**Red colour:** atrial fibrillation  
**Blue:** insufficient signal quality

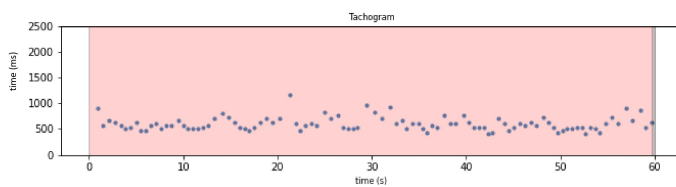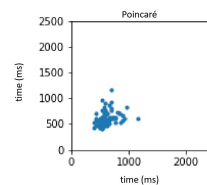

Supplement: Data_Sheet_4.PDF [file Data_Sheet_4.PDF]
